# Supplementary material for: Gene expression of Hanwoo satellite cell differentiation in longissimus dorsi and semimembranosus
Source: BMC Genomics. 2019 Feb 26;20:156. doi: 10.1186/s12864-019-5530-7 (PMC6390542; doi:10.1186/s12864-019-5530-7)
Supplement: Supplementary file 3 — Table S2. List of differentially expressed genes from the contrast LD vs SM and contrasts at each time point. (XLSX 380 kb) [file 12864_2019_5530_MOESM3_ESM.xlsx]

## Sheet: LDvsSM
LD0vsSM0
ENSEMBL	SYMBOL		logFC	logCPM	F	PValue	FDR
ENSBTAG00000004602	PITX1	paired-like homeodomain transcription factor 1	-3.00452	1.10432	73.2846	3.30985e-09	3.68276e-05
ENSBTAG00000039599	HOXB4		2.85001	1.97907	70.8113	4.66704e-09	3.68276e-05
ENSBTAG00000006879	HOXC11		-5.65131	0.646922	47.2361	2.13129e-07	0.000840901
ENSBTAG00000046177	IGFN1		4.72506	4.14194	35.0078	2.57627e-06	0.00813175
ENSBTAG00000025246	ZIC2		4.94928	-0.539649	31.5974	7.37752e-06	0.0194053
ENSBTAG00000021447	SIM2		-5.29684	2.44657	26.2343	2.15985e-05	0.0426084
LD1vsSM1
ENSEMBL			logFC	logCPM	F	PValue	FDR
ENSBTAG00000039599	HOXB4		2.79363	1.97907	66.7093	8.41767e-09	0.000108914
ENSBTAG00000006879	HOXC11		-7.44493	0.646922	61.1529	1.99661e-08	0.000108914
ENSBTAG00000012149	HOXC8		2.10137	3.5687	60.8561	2.07034e-08	0.000108914
ENSBTAG00000025246	ZIC2		7.88771	-0.539649	45.1389	4.69235e-07	0.00185137
ENSBTAG00000045643	FOXD1		2.1154	0.337817	33.2656	3.78527e-06	0.0119478
ENSBTAG00000021447	SIM2		-5.55267	2.44657	30.8845	6.70907e-06	0.0176471
ENSBTAG00000025009	HOXB9		3.64642	0.496715	29.5215	9.35226e-06	0.0210853
LD2vsSM2
ENSEMBL			logFC	logCPM	F	PValue	FDR
ENSBTAG00000039599	HOXB4		2.53342	1.97907	56.8114	3.92159e-08	0.000618906
ENSBTAG00000006879	HOXC11		-6.41955	0.646922	52.3522	8.4977e-08	0.000670554
ENSBTAG00000025246	ZIC2		5.85905	-0.539649	34.1615	4.16883e-06	0.0164481
ENSBTAG00000025009	HOXB9		3.19915	0.496715	28.5381	1.19473e-05	0.0377104
LD4vsSM4
ENSEMBL			logFC	logCPM	F	PValue	FDR
ENSBTAG00000039599	HOXB4		2.74189	1.97907	66.2052	9.06672e-09	0.000143091
ENSBTAG00000006879	HOXC11		-7.02027	0.646922	51.2073	1.03832e-07	0.000819341
ENSBTAG00000025009	HOXB9		4.68602	0.496715	47.5591	2.0073e-07	0.00105597
ENSBTAG00000014749	ZIC4		2.96712	1.91894	30.753	6.92513e-06	0.0218585
ENSBTAG00000021447	SIM2		-5.75421	2.44657	29.185	1.01645e-05	0.0267361
ENSBTAG00000025246	ZIC2		5.01128	-0.539649	28.7358	1.44145e-05	0.0324986
LD7vsSM7
ENSEMBL			logFC	logCPM	F	PValue	FDR
ENSBTAG00000025009	HOXB9		5.52671	0.496715	55.6632	4.83804e-08	0.000488239
ENSBTAG00000039599	HOXB4		2.44523	1.97907	54.0878	6.18729e-08	0.000488239
ENSBTAG00000006879	HOXC11		-6.17839	0.646922	47.2117	2.14101e-07	0.000844736
ENSBTAG00000009968	TBX4		-8.97893	-0.121987	42.4976	1.14816e-06	0.00362404
LD14vsSM14
ENSEMBL			logFC	logCPM	F	PValue	FDR
ENSBTAG00000039599	HOXB4		3.0743	1.97907	81.6411	1.10117e-09	1.73787e-05
ENSBTAG00000006879	HOXC11		-6.24374	0.646922	48.3689	1.72918e-07	0.0013645
ENSBTAG00000009968	TBX4		-9.47561	-0.121987	48.985	3.77492e-07	0.00166235
ENSBTAG00000014738	HOXA11		-2.10179	0.522891	43.1364	4.60291e-07	0.00166235
ENSBTAG00000014749	ZIC4		3.62981	1.91894	42.5327	5.2666e-07	0.00166235
ENSBTAG00000004602	PITX1		-2.21931	1.10432	41.0226	7.03522e-07	0.0018505
ENSBTAG00000009979	HOXB2		2.27898	2.49673	38.3322	1.24523e-06	0.00280745

## Sheet: LD
LD: d1 vs d0							LD: d2 vs d0							LD: d4 vs d0							LD: d7 vs d0							LD: d14 vs d0
ENSEMBL	logFC	logCPM	F	PValue	FDR		ENSEMBL	logFC	logCPM	F	PValue	FDR		ENSEMBL	logFC	logCPM	F	PValue	FDR		ENSEMBL	logFC	logCPM	F	PValue	FDR		ENSEMBL	logFC	logCPM	F	PValue	FDR
ENSBTAG00000019093	-3.33483	3.02628	57.9468	3.32434e-08	0.000262324		ENSBTAG00000014831	-2.42896	4.68888	44.3871	3.65975e-07	0.00251961		ENSBTAG00000011461	2.73665	5.8248	44.3941	3.65486e-07	0.00285149		ENSBTAG00000015460	5.31574	1.41354	57.9624	3.31595e-08	0.000523323		ENSBTAG00000007741	-4.56095	4.09426	52.6917	8.01203e-08	0.000890652
ENSBTAG00000016800	-3.12702	4.65452	50.8842	1.09934e-07	0.000373893		ENSBTAG00000027320	2.59365	5.95282	43.8229	4.0841e-07	0.00251961		ENSBTAG00000004510	2.24755	3.70025	36.1186	2.01342e-06	0.00453941		ENSBTAG00000018747	2.83152	1.35955	51.3408	9.98541e-08	0.00067217		ENSBTAG00000007661	2.07529	2.86348	50.1182	1.23782e-07	0.000890652
ENSBTAG00000018946	-4.26777	1.96959	45.5521	2.92613e-07	0.000507953		ENSBTAG00000004602	2.16954	1.10432	39.2695	1.0107e-06	0.00254715		ENSBTAG00000001917	2.53461	2.87037	33.0248	4.04742e-06	0.00489687		ENSBTAG00000004732	3.9599	5.41206	48.3012	1.75079e-07	0.00067217		ENSBTAG00000013462	-2.97108	3.99764	45.9847	2.69541e-07	0.000890652
ENSBTAG00000015366	-5.59824	8.81657	45.4834	2.96471e-07	0.000507953		ENSBTAG00000011461	2.52301	5.8248	38.3883	1.23344e-06	0.00254715		ENSBTAG00000007741	-3.33854	4.09426	32.4251	4.65423e-06	0.00489687		ENSBTAG00000044046	2.07154	4.71689	47.2405	2.12955e-07	0.00067217		ENSBTAG00000030210	3.86383	-0.377567	45.742	2.79636e-07	0.000890652
ENSBTAG00000012514	-5.4808	7.9684	42.2026	5.62505e-07	0.000571702		ENSBTAG00000006253	2.08053	10.082	38.1729	1.29117e-06	0.00254715		ENSBTAG00000009495	2.17444	6.69091	31.7407	5.4684e-06	0.00506105		ENSBTAG00000008866	2.66162	4.70539	46.0667	2.6539e-07	0.000698063		ENSBTAG00000006194	-3.66266	4.28245	44.3897	3.65794e-07	0.00096216
ENSBTAG00000029897	-2.63658	2.02466	41.8947	5.96944e-07	0.000571702		ENSBTAG00000047036	-4.39867	-0.709251	32.1464	4.96588e-06	0.00489822		ENSBTAG00000004940	-2.76038	-0.771403	30.7633	6.83706e-06	0.00506105		ENSBTAG00000001564	2.74764	8.75128	45.0335	3.23106e-07	0.000728465		ENSBTAG00000004732	3.68013	5.41206	42.7465	5.0476e-07	0.00113802
ENSBTAG00000015792	-2.93933	1.93461	41.895	5.98263e-07	0.000571702		ENSBTAG00000007782	-6.00489	4.91387	31.1764	6.25512e-06	0.00538299		ENSBTAG00000022699	2.87838	6.79287	30.4923	7.37575e-06	0.00506105		ENSBTAG00000047326	6.95977	0.11323	47.8124	4.5797e-07	0.000803075		ENSBTAG00000008497	4.67096	2.16018	36.8755	1.70645e-06	0.00224427
ENSBTAG00000004602	2.22888	1.10432	41.4287	6.47783e-07	0.000571702		ENSBTAG00000021035	-3.01233	11.8779	31.0287	6.4806e-06	0.00538299		ENSBTAG00000013290	2.19222	6.96015	29.9699	8.37638e-06	0.00528784		ENSBTAG00000007791	3.67725	1.23485	40.1971	8.45115e-07	0.00133376		ENSBTAG00000019567	-2.29129	1.58383	35.3416	2.36656e-06	0.00265107
ENSBTAG00000001898	-2.48202	4.59443	41.2009	6.88274e-07	0.000571702		ENSBTAG00000004322	-3.16064	4.50601	30.5136	7.33775e-06	0.00579022		ENSBTAG00000018566	4.58964	2.60864	28.4168	1.23176e-05	0.00627084		ENSBTAG00000008842	3.1147	5.25345	38.4801	1.20968e-06	0.00173556		ENSBTAG00000038523	2.18121	2.1766	35.1902	2.4635e-06	0.00265107
ENSBTAG00000011803	-9.52046	11.7072	40.8719	7.35917e-07	0.000580712		ENSBTAG00000006037	-5.55732	3.95783	29.7363	8.8703e-06	0.00608657		ENSBTAG00000043948	-2.71715	1.85136	28.2459	1.28606e-05	0.00634267		ENSBTAG00000013290	2.40909	6.96015	35.6411	2.23726e-06	0.00235389		ENSBTAG00000013290	2.36254	6.96015	34.3963	2.95658e-06	0.00265107
ENSBTAG00000014831	-2.29217	4.68888	40.0424	8.72538e-07	0.0006337		ENSBTAG00000000604	-2.88765	9.23824	29.2744	9.94146e-06	0.00627584		ENSBTAG00000003741	2.61944	3.40603	26.4882	2.02076e-05	0.00777845		ENSBTAG00000006823	3.75637	5.98082	34.4546	2.91784e-06	0.0025583		ENSBTAG00000008866	2.25545	4.70539	34.0477	3.20001e-06	0.00265107
ENSBTAG00000007782	-9.02017	4.91387	39.9638	8.8683e-07	0.0006337		ENSBTAG00000006686	-4.05757	0.823719	28.3071	1.26632e-05	0.00715169		ENSBTAG00000021992	2.29525	7.00683	25.784	2.4325e-05	0.00797293		ENSBTAG00000044126	2.62798	5.60432	33.9938	3.23954e-06	0.0025686		ENSBTAG00000017282	3.84665	0.590658	33.9942	3.23929e-06	0.00265107
ENSBTAG00000019382	-3.04986	5.34171	39.6571	9.45043e-07	0.0006337		ENSBTAG00000046885	2.40143	2.8262	28.2993	1.26883e-05	0.00715169		ENSBTAG00000013760	2.45851	0.844823	24.8156	3.15289e-05	0.00904707		ENSBTAG00000008248	2.32188	4.21025	33.3629	3.74337e-06	0.0025686		ENSBTAG00000015460	3.92892	1.41354	33.9312	3.28611e-06	0.00265107
ENSBTAG00000012516	-3.46931	1.15009	39.5018	9.76089e-07	0.0006337		ENSBTAG00000007239	-2.25156	3.70123	27.1563	1.69873e-05	0.00820912		ENSBTAG00000046323	3.34988	3.49357	24.6369	3.30927e-05	0.00928083		ENSBTAG00000008105	2.12886	4.63373	32.7902	4.27405e-06	0.00264105		ENSBTAG00000008868	5.16702	5.39791	33.8343	3.35961e-06	0.00265107
ENSBTAG00000017515	-2.77553	1.33066	38.5228	1.19528e-06	0.0006337		ENSBTAG00000045889	-5.35035	3.8715	26.9003	1.81508e-05	0.00820912		ENSBTAG00000046512	2.82115	7.28709	24.4486	3.48324e-05	0.00931736		ENSBTAG00000006491	3.22652	6.54025	32.7233	4.34107e-06	0.00264105		ENSBTAG00000020989	2.85656	1.5175	32.6312	4.43537e-06	0.00270774
ENSBTAG00000017135	-2.86869	4.23929	38.4743	1.21115e-06	0.0006337		ENSBTAG00000018566	4.43558	2.60864	26.9001	1.81514e-05	0.00820912		ENSBTAG00000006338	2.26149	2.57155	24.3106	3.61694e-05	0.00935778		ENSBTAG00000018465	2.12737	3.12691	32.5359	4.53512e-06	0.00265086		ENSBTAG00000018249	3.46824	4.32595	32.5196	4.55246e-06	0.00270774
ENSBTAG00000009387	-9.08892	8.23421	38.3996	1.23048e-06	0.0006337		ENSBTAG00000005567	5.47979	0.76929	26.6271	1.94873e-05	0.00820912		ENSBTAG00000017409	-3.27141	1.36472	23.9145	4.03231e-05	0.0101013		ENSBTAG00000010598	2.63759	6.5356	31.2843	6.09582e-06	0.00331738		ENSBTAG00000009338	3.10184	-0.425166	32.4552	4.59293e-06	0.00270774
ENSBTAG00000000604	-3.35763	9.23824	37.9769	1.34621e-06	0.0006337		ENSBTAG00000002853	-4.31836	4.06775	25.8597	2.38422e-05	0.00836172		ENSBTAG00000010578	4.14389	2.68016	23.6777	4.30496e-05	0.0102723		ENSBTAG00000008868	4.89854	5.39791	31.1297	6.32551e-06	0.00332764		ENSBTAG00000001603	2.48793	1.02882	32.3724	4.69499e-06	0.00270774
ENSBTAG00000021218	-9.42939	10.0809	37.6443	1.44552e-06	0.0006337		ENSBTAG00000002092	-7.12219	7.01445	25.4994	2.62385e-05	0.00881055		ENSBTAG00000021588	-5.93378	0.048542	23.6311	4.36096e-05	0.0102723		ENSBTAG00000020991	4.1198	-0.0454804	30.5189	7.32838e-06	0.0035069		ENSBTAG00000018747	2.20993	1.35955	32.2501	4.804e-06	0.00270774
ENSBTAG00000013909	-3.59542	4.93768	36.9185	1.69058e-06	0.000721099		ENSBTAG00000022020	4.18913	1.4173	24.572	3.36814e-05	0.0100294		ENSBTAG00000018571	-5.09643	5.23593	23.196	4.92282e-05	0.0109425		ENSBTAG00000013117	3.81035	3.83428	30.5163	7.33289e-06	0.0035069		ENSBTAG00000003398	-3.96532	2.2497	32.001	5.14199e-06	0.0027983
ENSBTAG00000006037	-6.5254	3.95783	36.6736	1.78307e-06	0.000740538		ENSBTAG00000017448	-3.09052	5.50212	24.2876	3.63972e-05	0.010444		ENSBTAG00000008333	-2.48328	4.98511	22.757	5.56951e-05	0.0115655		ENSBTAG00000002151	4.6699	1.33465	31.1156	8.23738e-06	0.00371435		ENSBTAG00000001564	2.25115	8.75128	31.4213	5.89978e-06	0.00305483
ENSBTAG00000015052	-2.07908	2.20304	36.3847	1.88066e-06	0.000743013		ENSBTAG00000046323	3.29416	3.49357	23.9809	3.95921e-05	0.0109919		ENSBTAG00000005850	2.61367	2.00334	22.1787	6.56446e-05	0.0130581		ENSBTAG00000046838	4.46692	2.37789	29.8746	8.57422e-06	0.00375884		ENSBTAG00000013339	3.48717	0.147891	31.3147	6.05173e-06	0.00305483
ENSBTAG00000009702	-10.4672	8.68963	36.0915	2.02544e-06	0.000779645		ENSBTAG00000012370	-8.05261	6.08456	23.9711	3.96994e-05	0.0109919		ENSBTAG00000005534	2.67551	7.07937	22.1497	6.61923e-05	0.0130581		ENSBTAG00000008436	-3.1338	5.09581	29.616	9.13689e-06	0.00381571		ENSBTAG00000043480	-4.63779	-1.00204	31.1786	6.19405e-06	0.00305483
ENSBTAG00000011500	-8.74278	8.51407	35.8089	2.15567e-06	0.000810017		ENSBTAG00000015059	-9.38161	2.65073	23.6518	4.33599e-05	0.0115984		ENSBTAG00000005288	-3.82532	6.74258	21.9858	6.93769e-05	0.0130605		ENSBTAG00000046333	5.51295	3.02108	29.5936	9.1875e-06	0.00381571		ENSBTAG00000044027	3.8291	3.46631	30.2933	7.74085e-06	0.00363413
ENSBTAG00000021035	-3.2661	11.8779	35.6726	2.22166e-06	0.000815401		ENSBTAG00000002473	3.32133	2.89126	23.461	4.57195e-05	0.0116218		ENSBTAG00000038141	3.38405	5.07383	21.9771	6.9551e-05	0.0130605		ENSBTAG00000003741	2.76015	3.40603	29.1635	1.02189e-05	0.00393812		ENSBTAG00000007791	3.14482	1.23485	30.2333	7.85478e-06	0.00363413
ENSBTAG00000003514	-4.41786	5.57205	35.242	2.44488e-06	0.000832689		ENSBTAG00000006472	-2.49971	1.87154	23.4136	4.63257e-05	0.0116218		ENSBTAG00000006491	2.56886	6.54025	21.8769	7.15841e-05	0.0131365		ENSBTAG00000020141	4.63808	1.52685	29.0988	1.03847e-05	0.00393812		ENSBTAG00000002151	4.66608	1.33465	31.0805	8.30428e-06	0.00363413
ENSBTAG00000005163	-5.72477	6.6428	35.1289	2.50743e-06	0.000832689		ENSBTAG00000005288	-3.94866	6.74258	23.3519	4.71295e-05	0.0116218		ENSBTAG00000006434	2.21855	8.7983	21.3724	8.2843e-05	0.0142246		ENSBTAG00000004860	4.84919	-0.29614	28.8921	1.09335e-05	0.00393812		ENSBTAG00000018975	5.65923	0.466765	29.8284	8.672e-06	0.00363413
ENSBTAG00000045822	-3.14222	6.38356	34.9731	2.5964e-06	0.000832689		ENSBTAG00000003312	2.68819	1.32924	22.9869	5.22012e-05	0.0120853		ENSBTAG00000004004	2.51669	5.87067	21.1523	8.83404e-05	0.0144021		ENSBTAG00000013760	2.65479	0.844823	28.8265	1.11143e-05	0.00393812		ENSBTAG00000001274	2.87037	2.79752	29.8236	8.68217e-06	0.00363413
ENSBTAG00000020236	-2.56856	3.93271	34.9334	2.61963e-06	0.000832689		ENSBTAG00000011548	-5.29937	5.9469	22.9438	5.28377e-05	0.0120853		ENSBTAG00000017659	2.01535	4.91536	21.0986	8.97399e-05	0.0144021		ENSBTAG00000002853	3.74157	4.06775	28.7562	1.13115e-05	0.00393812		ENSBTAG00000003403	4.52128	1.39057	29.2951	9.89071e-06	0.0038072
ENSBTAG00000006541	-7.46201	7.88715	34.6866	2.76902e-06	0.000832689		ENSBTAG00000002739	-4.14654	1.80143	22.7815	5.53099e-05	0.0122944		ENSBTAG00000047894	-7.09018	0.0918519	21.0335	9.14699e-05	0.0144021		ENSBTAG00000017282	3.51105	0.590658	28.6872	1.15087e-05	0.00393812		ENSBTAG00000008842	2.66355	5.25345	29.1426	1.02721e-05	0.00385988
ENSBTAG00000017448	-3.82738	5.50212	34.6156	2.8137e-06	0.000832689		ENSBTAG00000038849	-6.10831	4.21308	22.5309	5.93769e-05	0.0127025		ENSBTAG00000016170	3.89877	3.34475	20.9286	9.43322e-05	0.0144021		ENSBTAG00000018249	3.2216	4.32595	28.5994	1.1765e-05	0.00393812		ENSBTAG00000005432	-2.47439	7.70973	28.9101	1.08846e-05	0.00399489
ENSBTAG00000020080	-6.56337	4.10195	34.3399	2.99455e-06	0.000832689		ENSBTAG00000018946	-2.71063	1.96959	22.4698	6.04168e-05	0.0127025		ENSBTAG00000001139	2.95308	3.47775	20.7156	0.000100447	0.0144435		ENSBTAG00000007741	-3.08888	4.09426	28.5281	1.19775e-05	0.00393812		ENSBTAG00000006491	2.96815	6.54025	28.3005	1.26845e-05	0.00436367
ENSBTAG00000003396	-2.97069	5.14046	34.1302	3.14049e-06	0.000832689		ENSBTAG00000038141	3.42545	5.07383	22.4684	6.04398e-05	0.0127025		ENSBTAG00000030520	2.30752	4.52398	20.7095	0.000100628	0.0144435		ENSBTAG00000004079	3.38057	9.11776	28.3511	1.25235e-05	0.00403358		ENSBTAG00000016357	5.84736	-0.771345	29.0571	1.33459e-05	0.00448139
ENSBTAG00000038025	-2.72165	7.21416	34.0828	3.17457e-06	0.000832689		ENSBTAG00000039607	-3.41817	-0.266958	22.186	6.55076e-05	0.0132732		ENSBTAG00000012467	-2.64507	4.14589	20.4786	0.000107753	0.0146418		ENSBTAG00000043548	4.27601	1.28881	27.7335	1.46483e-05	0.00450628		ENSBTAG00000047326	5.52777	0.11323	29.9808	1.41245e-05	0.00454924
ENSBTAG00000046140	-3.93276	3.32429	33.995	3.23865e-06	0.000832689		ENSBTAG00000037735	-3.7059	0.658	22.171	6.57899e-05	0.0132732		ENSBTAG00000009576	2.0376	6.74747	20.4661	0.000108156	0.0146418		ENSBTAG00000046574	3.36573	4.47408	27.6864	1.48253e-05	0.00450628		ENSBTAG00000018204	5.48478	5.26335	28.6537	1.47024e-05	0.00455022
ENSBTAG00000045757	-7.97544	8.18483	33.9454	3.27553e-06	0.000832689		ENSBTAG00000012319	-6.4444	3.62209	22.1366	6.64416e-05	0.0132732		ENSBTAG00000008111	-4.11807	-0.209634	20.4063	0.000110097	0.0146418		ENSBTAG00000015368	2.87595	3.40006	27.588	1.5203e-05	0.00450628		ENSBTAG00000019052	2.10341	6.3301	27.3664	1.60924e-05	0.00461764
ENSBTAG00000007239	-2.54226	3.70123	33.7575	3.41913e-06	0.000832689		ENSBTAG00000007052	2.05475	2.82204	21.8983	7.11446e-05	0.0136927		ENSBTAG00000008497	3.35108	2.16018	20.27	0.000114661	0.0146418		ENSBTAG00000002964	3.32828	3.97946	27.4614	1.57043e-05	0.00450628		ENSBTAG00000012653	5.39743	3.72685	26.7141	1.90507e-05	0.00495316
ENSBTAG00000002898	-8.2918	5.84168	33.692	3.47078e-06	0.000832689		ENSBTAG00000018352	-5.79973	4.63308	21.494	7.99667e-05	0.0144426		ENSBTAG00000029803	-2.69943	-0.0466216	20.232	0.000115969	0.0146418		ENSBTAG00000014003	2.78043	4.81264	27.0979	1.72454e-05	0.00477485		ENSBTAG00000006823	3.22541	5.98082	26.6042	1.96041e-05	0.00495316
ENSBTAG00000015094	-6.11293	2.0489	33.6166	3.53132e-06	0.000832689		ENSBTAG00000020679	-2.90692	1.53922	21.1098	8.94481e-05	0.0152222		ENSBTAG00000033961	2.07815	4.21928	20.0205	0.000123554	0.014885		ENSBTAG00000008501	5.32238	-0.905563	31.9873	1.82119e-05	0.00487152		ENSBTAG00000030885	2.8528	3.15588	26.5335	1.99693e-05	0.00495316
ENSBTAG00000021508	-7.58863	7.29521	33.5315	3.60094e-06	0.000832689		ENSBTAG00000009055	-2.81498	2.7716	20.9386	9.4055e-05	0.0152222		ENSBTAG00000022020	3.75725	1.4173	19.9811	0.000125027	0.0149092		ENSBTAG00000003398	-3.50012	2.2497	26.5803	1.97268e-05	0.00500208		ENSBTAG00000003741	2.61847	3.40603	26.4985	2.01531e-05	0.00495316
ENSBTAG00000013242	-7.2818	6.94619	33.5139	3.61552e-06	0.000832689		ENSBTAG00000021855	-3.66781	0.0266897	20.8219	9.73436e-05	0.0152222		ENSBTAG00000015093	4.00147	-1.00162	19.7289	0.000134899	0.0154273		ENSBTAG00000001274	2.68795	2.79752	26.4684	2.03122e-05	0.00500208		ENSBTAG00000012900	2.4562	1.07665	26.3927	2.07188e-05	0.00495316
ENSBTAG00000001303	-3.11314	10.0407	33.4839	3.64058e-06	0.000832689		ENSBTAG00000047894	-6.55158	0.0918519	20.7924	9.81945e-05	0.0152222		ENSBTAG00000011743	2.23181	1.12414	19.5792	0.000141155	0.0156881		ENSBTAG00000039462	-4.82061	4.81919	26.4451	2.04367e-05	0.00500208		ENSBTAG00000013760	2.53049	0.844823	26.3281	2.10727e-05	0.00495316
ENSBTAG00000021916	-6.88312	7.23367	33.1791	3.90547e-06	0.000852304		ENSBTAG00000008240	-2.32177	3.14415	20.7727	9.87659e-05	0.0152222		ENSBTAG00000030973	3.3067	1.23249	19.4213	0.000148094	0.0157434		ENSBTAG00000016768	4.23427	2.4175	26.4144	2.06016e-05	0.00500208		ENSBTAG00000018571	-5.57187	5.23593	26.3059	2.11961e-05	0.00495316
ENSBTAG00000014885	-6.35611	6.44798	33.1675	3.91594e-06	0.000852304		ENSBTAG00000015366	-3.39808	8.81657	20.7183	0.000100366	0.0152222		ENSBTAG00000016026	-2.56578	5.12704	19.295	0.00015391	0.0160054		ENSBTAG00000018571	-5.56412	5.23593	26.2541	2.14861e-05	0.00512422		ENSBTAG00000010598	2.38975	6.5356	26.1711	2.19606e-05	0.00495316
ENSBTAG00000006862	-2.18472	4.37162	33.0837	3.99262e-06	0.000852304		ENSBTAG00000021685	-4.21616	6.1248	20.6246	0.000103188	0.0152222		ENSBTAG00000003432	2.74239	0.437394	19.1612	0.000160341	0.0163258		ENSBTAG00000038865	2.8023	3.76537	26.207	2.17541e-05	0.00512422		ENSBTAG00000005078	-2.30538	6.40209	26.1695	2.19694e-05	0.00495316
ENSBTAG00000000310	-3.72482	6.61943	32.6869	4.37807e-06	0.000865224		ENSBTAG00000003700	-2.46387	1.21883	20.5186	0.000106481	0.0153759		ENSBTAG00000003212	2.17586	7.60554	18.9704	0.000170013	0.0170901		ENSBTAG00000002749	3.94033	-1.00483	26.9609	2.22594e-05	0.0051261		ENSBTAG00000024947	-3.57355	2.63695	25.871	2.37709e-05	0.00502682
ENSBTAG00000010498	-2.2983	6.79368	32.6577	4.40799e-06	0.000865224		ENSBTAG00000000177	2.37071	4.85558	20.0784	0.000121426	0.0165203		ENSBTAG00000004499	-2.26009	6.45621	18.5612	0.00019295	0.0184554		ENSBTAG00000013124	3.95138	2.21162	25.8382	2.3978e-05	0.00540602		ENSBTAG00000008507	-2.94707	5.23037	25.78	2.43513e-05	0.00502682
ENSBTAG00000016140	-2.15822	3.75766	32.626	4.4407e-06	0.000865224		ENSBTAG00000006240	-2.56413	4.23839	19.6117	0.000139773	0.017287		ENSBTAG00000008250	-2.24366	3.31992	18.4404	0.000200343	0.0188113		ENSBTAG00000002981	-4.31491	4.70325	25.7368	2.4632e-05	0.00547524		ENSBTAG00000018819	2.50664	1.67274	25.6636	2.51156e-05	0.00502682
ENSBTAG00000003711	-4.28342	8.6699	31.7324	5.47915e-06	0.000947347		ENSBTAG00000015094	-3.88726	2.0489	19.545	0.00014263	0.0173153		ENSBTAG00000008842	2.0751	5.25345	18.3845	0.000203869	0.0188113		ENSBTAG00000047322	-4.28541	4.2611	25.6673	2.5091e-05	0.00549981		ENSBTAG00000009145	2.86058	1.40875	25.6149	2.54432e-05	0.00502682
ENSBTAG00000002092	-9.86355	7.01445	31.6682	5.56329e-06	0.000947347		ENSBTAG00000018204	-9.16911	5.26335	19.9545	0.000146469	0.0176456		ENSBTAG00000019772	2.39664	3.68351	18.3516	0.00020597	0.0188113		ENSBTAG00000008497	3.79577	2.16018	25.5726	2.57309e-05	0.0055628		ENSBTAG00000008150	2.2383	4.91105	25.6093	2.54813e-05	0.00502682
ENSBTAG00000037794	-10.8229	5.10803	32.7443	5.69651e-06	0.00095275		ENSBTAG00000009707	-5.12354	8.66243	19.1253	0.000162113	0.0184732		ENSBTAG00000020250	2.09056	1.01983	18.1057	0.000222471	0.0192914		ENSBTAG00000011944	3.75154	1.63741	25.3895	2.70199e-05	0.00576253		ENSBTAG00000044126	2.24299	5.60432	25.4595	2.65188e-05	0.00516019
ENSBTAG00000024081	-2.64159	7.13325	31.4994	5.79094e-06	0.00095275		ENSBTAG00000004388	-5.76091	-0.0510652	19.1235	0.000162204	0.0184732		ENSBTAG00000004599	2.11787	7.12807	18.0405	0.000227076	0.0195831		ENSBTAG00000008661	3.8603	0.261654	25.2688	2.79068e-05	0.00577543		ENSBTAG00000013614	2.48908	4.92416	25.4185	2.68113e-05	0.00516019
ENSBTAG00000021009	-6.06533	6.64133	31.4094	5.91653e-06	0.000952802		ENSBTAG00000000507	-2.73447	3.36105	19.0739	0.00016469	0.0184732		ENSBTAG00000001728	-2.19934	1.46613	17.9662	0.000232453	0.0197235		ENSBTAG00000002756	-3.68035	4.79564	25.1932	2.84788e-05	0.00577543		ENSBTAG00000000983	6.62162	2.06587	25.2137	2.83223e-05	0.00525862
ENSBTAG00000016399	-3.37452	0.459501	31.1348	6.31775e-06	0.000982106		ENSBTAG00000017655	-3.15116	3.45297	19.0669	0.000165044	0.0184732		ENSBTAG00000015059	-6.98345	2.65073	17.91	0.000236613	0.0198716		ENSBTAG00000008499	-3.53843	4.47857	25.1608	2.87272e-05	0.00577543		ENSBTAG00000038889	2.26958	2.89469	25.1106	2.91172e-05	0.00534335
ENSBTAG00000017743	-8.45768	6.9088	31.1153	6.34741e-06	0.000982106		ENSBTAG00000010991	-7.45427	5.33088	18.7682	0.000180957	0.019265		ENSBTAG00000000698	2.86497	5.90931	17.8157	0.000243778	0.0201429		ENSBTAG00000026704	-2.71056	3.36671	25.0904	2.9276e-05	0.00577543		ENSBTAG00000005333	6.13538	7.87878	24.9647	3.02841e-05	0.00549361
ENSBTAG00000004322	-3.19238	4.50601	31.0499	6.44767e-06	0.000987933		ENSBTAG00000006733	-5.45989	4.39469	19.2001	0.000182781	0.019265		ENSBTAG00000046332	3.28786	11.1183	17.5885	0.000261999	0.020684		ENSBTAG00000014326	-3.85559	4.64397	24.7982	3.16776e-05	0.00588978		ENSBTAG00000001086	-2.02828	7.26754	24.7994	3.16667e-05	0.00567914
ENSBTAG00000006240	-3.33666	4.23839	30.8215	6.81168e-06	0.000994505		ENSBTAG00000015074	-4.32949	5.38987	18.7157	0.000183922	0.019265		ENSBTAG00000015387	2.17571	2.72953	17.5156	0.000268158	0.020684		ENSBTAG00000016357	5.53332	-0.771345	25.5625	3.16997e-05	0.00588978		ENSBTAG00000021924	5.88496	-1.18872	24.6981	3.25483e-05	0.00570752
ENSBTAG00000013920	-3.48729	1.59914	30.7843	6.87309e-06	0.000994505		ENSBTAG00000019159	-4.91226	-0.111936	18.6666	0.000186742	0.019265		ENSBTAG00000015751	-2.07259	6.93304	17.4722	0.000271895	0.020684		ENSBTAG00000001938	-3.20234	5.32775	24.7851	3.17896e-05	0.00588978		ENSBTAG00000016026	-2.94431	5.12704	24.5703	3.36974e-05	0.00578189
ENSBTAG00000001176	-5.97815	7.58129	30.772	6.89346e-06	0.000994505		ENSBTAG00000024647	-3.00999	3.99834	18.5717	0.000192323	0.0194566		ENSBTAG00000014956	2.58699	4.77551	17.4434	0.000274411	0.020684		ENSBTAG00000013573	-3.13253	5.78505	24.7121	3.24246e-05	0.00588978		ENSBTAG00000002853	3.41324	4.06775	24.5694	3.37051e-05	0.00578189
ENSBTAG00000002804	-2.69489	8.57727	30.7558	6.92044e-06	0.000994505		ENSBTAG00000017504	-3.65739	3.35237	18.4764	0.000198111	0.0199146		ENSBTAG00000000792	-5.76759	-1.06652	17.4271	0.000275837	0.020684		ENSBTAG00000020125	2.35278	7.82178	24.7055	3.24831e-05	0.00588978		ENSBTAG00000015368	2.69272	3.40006	24.4965	3.43804e-05	0.00583432
ENSBTAG00000004840	-6.51479	8.83059	30.5496	7.27398e-06	0.00102196		ENSBTAG00000018460	2.0883	5.10428	18.3657	0.000205067	0.020295		ENSBTAG00000006037	-3.91469	3.95783	17.3878	0.000279331	0.020684		ENSBTAG00000009314	2.06947	0.723734	24.4834	3.42727e-05	0.00600991		ENSBTAG00000018071	2.33123	1.3127	23.8058	4.15514e-05	0.00632838
ENSBTAG00000048157	-3.13305	5.16513	30.2813	7.76348e-06	0.00106542		ENSBTAG00000019636	-6.71328	4.26294	18.1921	0.000216517	0.0207776		ENSBTAG00000040290	-2.02056	1.74412	17.3605	0.00028178	0.020684		ENSBTAG00000007247	-3.04043	3.97682	24.3691	3.55959e-05	0.00613752		ENSBTAG00000002744	2.77794	4.6084	23.758	4.21037e-05	0.00632838
ENSBTAG00000043553	-6.87446	8.66109	30.2397	7.84246e-06	0.00106698		ENSBTAG00000003276	-2.30696	2.02297	18.1856	0.000216957	0.0207776		ENSBTAG00000048029	-6.19255	-0.621148	17.5833	0.000298004	0.0213777		ENSBTAG00000018707	4.06419	5.20175	24.3504	3.57782e-05	0.00613752		ENSBTAG00000020679	2.76164	1.53922	23.6098	4.38679e-05	0.00645641
ENSBTAG00000019234	-2.67273	2.281	30.0516	8.2108e-06	0.00106894		ENSBTAG00000007654	-3.08469	1.77399	18.1402	0.000220075	0.0207776		ENSBTAG00000022244	3.34027	7.52411	16.9475	0.000321821	0.0222063		ENSBTAG00000000983	6.45216	2.06587	24.0548	3.87962e-05	0.00615303		ENSBTAG00000006601	2.12019	4.52222	23.5169	4.50137e-05	0.00645824
ENSBTAG00000012249	-2.66896	0.902924	29.8934	8.51965e-06	0.00106894		ENSBTAG00000045822	-2.16918	6.38356	18.0893	0.000223617	0.0208598		ENSBTAG00000005714	2.62581	11.1095	16.9437	0.000322219	0.0222063		ENSBTAG00000018947	-3.82553	1.78854	23.9747	3.96604e-05	0.00615303		ENSBTAG00000002964	3.0427	3.97946	23.461	4.57185e-05	0.00650026
ENSBTAG00000018352	-9.50434	4.63308	29.8829	8.55688e-06	0.00106894		ENSBTAG00000027126	-4.90142	-0.337372	18.4126	0.000231338	0.0211039		ENSBTAG00000008807	3.02736	1.9349	16.9155	0.000325176	0.0222401		ENSBTAG00000005269	-3.99372	3.89434	23.9085	4.03899e-05	0.00615303		ENSBTAG00000013079	2.47237	-0.358003	23.2605	4.80366e-05	0.00670897
ENSBTAG00000011483	-2.86837	4.39378	29.8605	8.60397e-06	0.00106894		ENSBTAG00000006453	-5.31581	0.505446	18.3038	0.000239078	0.0215206		ENSBTAG00000013347	2.41359	7.72633	16.847	0.000332471	0.0225167		ENSBTAG00000017719	3.03092	5.51824	23.6957	4.28356e-05	0.00633563		ENSBTAG00000046838	3.84567	2.37789	23.1755	4.95114e-05	0.00679468
ENSBTAG00000032588	-3.10251	2.84963	29.8373	8.65313e-06	0.00106894		ENSBTAG00000021272	-4.7159	3.64596	17.8651	0.000239997	0.0215206		ENSBTAG00000005765	2.55081	3.7875	16.821	0.000335282	0.0225167		ENSBTAG00000021992	2.19157	7.00683	23.6857	4.29548e-05	0.00633563		ENSBTAG00000007206	3.2477	4.69355	23.1184	5.03088e-05	0.00681821
ENSBTAG00000002036	-2.63468	6.01908	29.8203	8.68915e-06	0.00106894		ENSBTAG00000039356	-8.91871	-0.240503	19.4	0.000243182	0.021683		ENSBTAG00000018249	2.39814	4.32595	16.7528	0.000342794	0.0225688		ENSBTAG00000018216	-3.23669	2.99466	23.5689	4.43683e-05	0.00648352		ENSBTAG00000016255	-3.23216	2.08373	23.1016	5.05469e-05	0.00681821
ENSBTAG00000009707	-7.19855	8.66243	29.7978	8.73736e-06	0.00106894		ENSBTAG00000020342	-2.25498	5.1661	17.6832	0.000254231	0.021838		ENSBTAG00000014898	2.36787	2.31331	16.7183	0.000346655	0.0225688		ENSBTAG00000019276	-4.101	5.72649	23.4452	4.5921e-05	0.00659279		ENSBTAG00000027444	2.41495	6.86898	22.9978	5.20407e-05	0.00687926
ENSBTAG00000008419	-6.56593	6.25282	29.6926	8.96628e-06	0.00108175		ENSBTAG00000000140	-2.16226	3.63651	17.415	0.000276906	0.0227015		ENSBTAG00000005353	3.16013	10.7791	16.6426	0.000355311	0.0228257		ENSBTAG00000011992	2.74987	1.08752	23.4274	4.61486e-05	0.00659279		ENSBTAG00000047894	-7.90535	0.0918519	22.8414	5.43835e-05	0.00703246
ENSBTAG00000006999	-5.63626	7.62222	29.6148	9.13952e-06	0.00108175		ENSBTAG00000005163	-3.49985	6.6428	17.2484	0.000292085	0.0232813		ENSBTAG00000037397	2.22825	-0.550305	16.6237	0.000356027	0.0228257		ENSBTAG00000004428	-2.88835	7.2442	23.4103	4.63692e-05	0.00659279		ENSBTAG00000014465	-2.9006	9.51742	22.7381	5.5993e-05	0.00708856
ENSBTAG00000038195	-2.45403	6.39868	29.5864	9.20367e-06	0.00108175		ENSBTAG00000039696	3.17895	0.699716	16.8921	0.000327647	0.0249633		ENSBTAG00000045767	2.46301	-0.61782	16.5307	0.000368152	0.0231481		ENSBTAG00000016450	2.80712	1.22961	23.371	4.68798e-05	0.00660586		ENSBTAG00000040098	-3.32323	0.157467	22.6286	5.77537e-05	0.00708856
ENSBTAG00000008140	-3.61482	7.0753	29.5268	9.34004e-06	0.00108175		ENSBTAG00000027766	-3.0706	5.74854	16.8283	0.000334492	0.025019		ENSBTAG00000002110	-3.51088	-1.73583	16.2959	0.000397211	0.0242313		ENSBTAG00000016170	4.13614	3.34475	23.2072	4.90738e-05	0.00677765		ENSBTAG00000021189	4.44045	2.92629	22.5821	5.85207e-05	0.00708856
ENSBTAG00000003959	-2.16079	5.53952	29.5074	9.38481e-06	0.00108175		ENSBTAG00000006662	-2.22767	2.57247	16.7456	0.0003436	0.0255443		ENSBTAG00000018216	-2.58914	2.99466	16.2986	0.000397663	0.0242313		ENSBTAG00000021069	-2.98948	4.91053	23.1597	4.97305e-05	0.00677765		ENSBTAG00000007090	5.22904	6.40816	22.5577	5.89269e-05	0.00708856
ENSBTAG00000015046	-3.1447	2.46891	29.2821	9.92255e-06	0.00113477		ENSBTAG00000039995	-3.97251	6.42092	16.6693	0.000352238	0.0255443		ENSBTAG00000024663	3.1835	1.74385	16.1522	0.000417312	0.024947		ENSBTAG00000007206	3.24741	4.69355	23.1109	5.04159e-05	0.00680055		ENSBTAG00000044067	2.16525	0.629186	22.5293	5.92192e-05	0.00708856
ENSBTAG00000039607	-4.16727	-0.266958	29.1114	1.03523e-05	0.00115872		ENSBTAG00000021588	-4.1813	0.048542	16.6358	0.000356095	0.0255443		ENSBTAG00000009650	2.93873	0.0773755	16.0514	0.000431448	0.025209		ENSBTAG00000006907	3.88109	9.48275	22.9704	5.24443e-05	0.00696679		ENSBTAG00000009797	2.90328	0.860252	22.5268	5.94467e-05	0.00708856
ENSBTAG00000001503	-5.57036	6.30043	28.9695	1.07244e-05	0.00118481		ENSBTAG00000019577	-4.88772	2.01737	16.6103	0.000359069	0.0255443		ENSBTAG00000001003	2.10117	0.508603	15.8938	0.000454605	0.0256235		ENSBTAG00000029926	5.92424	-1.17853	25.2805	5.49296e-05	0.00722416		ENSBTAG00000013008	-3.39972	2.37203	22.5112	5.97104e-05	0.00708856
ENSBTAG00000024904	-3.06977	0.223996	28.9617	1.07355e-05	0.00118481		ENSBTAG00000003705	-2.35949	0.841538	16.5082	0.000371248	0.0259249		ENSBTAG00000008428	-3.40684	1.12251	15.8135	0.000466906	0.025885		ENSBTAG00000018975	4.9325	0.466765	22.7536	5.57485e-05	0.00727126		ENSBTAG00000015416	4.65856	-0.239192	22.4832	6.01867e-05	0.00708856
ENSBTAG00000009696	-6.49953	7.98845	28.8977	1.09182e-05	0.00119661		ENSBTAG00000000634	-2.26185	1.83989	16.4719	0.000375683	0.0260717		ENSBTAG00000018253	2.35467	7.92349	15.8079	0.000467777	0.025885		ENSBTAG00000008182	2.98058	0.197199	22.5859	5.84578e-05	0.00752881		ENSBTAG00000013537	2.18263	4.09866	22.3416	6.26621e-05	0.00711414
ENSBTAG00000006937	-3.43421	2.45386	28.7127	1.14354e-05	0.00123439		ENSBTAG00000026768	3.87762	2.57051	16.3674	0.000388784	0.0265618		ENSBTAG00000008652	2.08374	6.27097	15.679	0.000488335	0.0263914		ENSBTAG00000019777	-3.68198	4.5556	22.5584	5.89154e-05	0.00752881		ENSBTAG00000020685	-2.10697	6.22312	22.2997	6.34148e-05	0.00711414
ENSBTAG00000015086	-4.74802	3.89262	28.691	1.14976e-05	0.00123439		ENSBTAG00000004019	-3.63463	3.78565	16.3186	0.000395066	0.0265619		ENSBTAG00000018167	2.9861	4.70523	15.6662	0.000490429	0.0263914		ENSBTAG00000000660	-3.58031	4.08455	22.5158	5.96313e-05	0.00752881		ENSBTAG00000002756	-3.39226	4.79564	22.2152	6.49627e-05	0.00711414
ENSBTAG00000022147	-3.45412	4.03554	28.4709	1.21511e-05	0.0012545		ENSBTAG00000011483	-2.03189	4.39378	16.3027	0.000397133	0.0265619		ENSBTAG00000048049	4.28137	1.71912	15.6165	0.000498647	0.0265289		ENSBTAG00000015875	-3.99119	3.44476	22.4417	6.09003e-05	0.00759258		ENSBTAG00000009830	-2.0526	0.18472	22.1849	6.50802e-05	0.00711414
ENSBTAG00000011489	-2.36502	1.56253	28.4036	1.23587e-05	0.0012545		ENSBTAG00000019453	-2.98196	5.03093	16.2954	0.000398083	0.0265619		ENSBTAG00000046286	-2.09529	3.75125	15.4078	0.000534835	0.0275672		ENSBTAG00000007210	3.7844	3.80676	22.4254	6.1184e-05	0.00759258		ENSBTAG00000010986	3.28598	2.23569	22.0206	6.86879e-05	0.00728582
ENSBTAG00000017504	-4.87232	3.35237	28.3949	1.2386e-05	0.0012545		ENSBTAG00000048029	-5.22092	-0.621148	16.6286	0.000401588	0.0265619		ENSBTAG00000009035	-3.16564	4.16656	15.4028	0.000535744	0.0275672		ENSBTAG00000013008	-3.38389	2.37203	22.2767	6.3832e-05	0.00770941		ENSBTAG00000018707	3.82286	5.20175	22.0012	6.90719e-05	0.00728582
ENSBTAG00000012088	-4.04084	7.24712	28.3327	1.25818e-05	0.00125997		ENSBTAG00000016399	-2.26592	0.459501	16.2511	0.000403932	0.0265619		ENSBTAG00000013569	-3.4771	-1.17175	15.2941	0.000555735	0.0276776		ENSBTAG00000027444	2.36593	6.86898	22.1533	6.61235e-05	0.00785773		ENSBTAG00000010284	3.48967	0.0561774	21.9372	7.03522e-05	0.00728582
ENSBTAG00000018267	-8.76324	5.43047	28.3165	1.26334e-05	0.00125997		ENSBTAG00000048157	-2.19413	5.16513	16.1611	0.000416091	0.0271183		ENSBTAG00000045789	3.38819	7.2395	15.2467	0.000564706	0.0276776		ENSBTAG00000040290	-2.30335	1.74412	22.1403	6.6371e-05	0.00785773		ENSBTAG00000015101	-2.19398	5.35523	21.9209	7.0683e-05	0.00728582
ENSBTAG00000000140	-2.83975	3.63651	28.2745	1.2768e-05	0.00125997		ENSBTAG00000005556	-2.5214	5.57628	16.1065	0.000423662	0.0271183		ENSBTAG00000013147	-3.86978	2.12867	15.1577	0.000581968	0.0280306		ENSBTAG00000008758	-3.88474	6.07049	22.0703	6.77149e-05	0.00790507		ENSBTAG00000011101	2.09167	3.60691	21.8389	7.23717e-05	0.00736883
ENSBTAG00000021120	-6.91002	6.56314	28.2585	1.28195e-05	0.00125997		ENSBTAG00000005085	-2.16355	3.90646	16.0836	0.000426882	0.0271655		ENSBTAG00000000589	2.95011	3.41173	15.1547	0.000582564	0.0280306		ENSBTAG00000038889	2.11442	2.89469	21.9831	6.94302e-05	0.00790507		ENSBTAG00000016170	3.98575	3.34475	21.7846	7.35154e-05	0.0074373
ENSBTAG00000013160	-3.30245	2.45519	28.248	1.28536e-05	0.00125997		ENSBTAG00000043553	-4.4526	8.66109	16.0642	0.000429634	0.0272268		ENSBTAG00000017482	2.34069	4.33173	15.0779	0.000597939	0.0283329		ENSBTAG00000035319	-3.4412	4.32147	21.9722	6.96488e-05	0.00790507		ENSBTAG00000048029	-9.05708	-0.621148	22.3436	7.45246e-05	0.00749138
ENSBTAG00000045789	-5.25097	7.2395	28.1884	1.30489e-05	0.0012602		ENSBTAG00000021251	-4.74955	-1.63838	16.3241	0.000440882	0.0272649		ENSBTAG00000048267	3.00429	2.41167	15.0673	0.000600092	0.0283329		ENSBTAG00000046910	-3.76997	4.75843	21.9489	7.01162e-05	0.00790507		ENSBTAG00000046574	2.92651	4.47408	21.6696	7.59979e-05	0.00753945
ENSBTAG00000008612	-6.11923	8.30757	28.1395	1.32115e-05	0.0012602		ENSBTAG00000005234	-2.77355	1.73737	15.9358	0.000448306	0.0273728		ENSBTAG00000001078	2.75042	7.48414	15.0135	0.000611173	0.0286217		ENSBTAG00000002331	-4.31315	4.43896	21.9391	7.0315e-05	0.00790507		ENSBTAG00000038865	2.52167	3.76537	21.6372	7.67131e-05	0.00753945
ENSBTAG00000037735	-4.48668	0.658	28.0891	1.33812e-05	0.0012602		ENSBTAG00000014345	-6.7188	1.89112	15.7319	0.000479787	0.0281487		ENSBTAG00000016171	-2.58183	-1.24675	14.9846	0.000614726	0.0286648		ENSBTAG00000039686	4.14784	0.946305	21.8126	7.29223e-05	0.00801478		ENSBTAG00000039686	4.12507	0.946305	21.6068	7.73914e-05	0.00753945
ENSBTAG00000002739	-4.83659	1.80143	27.8819	1.41044e-05	0.00129797		ENSBTAG00000019540	2.77615	2.40827	15.7028	0.000484473	0.028251		ENSBTAG00000001219	4.08032	1.56561	14.9336	0.000628043	0.0290668		ENSBTAG00000046807	2.83305	1.05409	21.8	7.3188e-05	0.00801478		ENSBTAG00000000345	-2.39338	3.13021	21.5042	7.9729e-05	0.00760321
ENSBTAG00000012992	-4.70407	2.01639	27.8704	1.41459e-05	0.00129797		ENSBTAG00000000792	-4.70807	-1.06652	15.6335	0.000495818	0.0286789		ENSBTAG00000002744	2.14821	4.6084	14.8098	0.000655158	0.0298835		ENSBTAG00000033441	-4.10315	4.40998	21.7625	7.39852e-05	0.00801478		ENSBTAG00000016924	2.36057	6.48523	21.4716	8.04883e-05	0.00760321
ENSBTAG00000015745	-2.58076	5.15237	27.59	1.51953e-05	0.00134094		ENSBTAG00000000809	-3.36223	0.446328	15.5034	0.000517925	0.0294794		ENSBTAG00000003334	-4.9073	-1.27125	14.7693	0.000664307	0.0301144		ENSBTAG00000001717	-2.4192	4.54994	21.7371	7.45298e-05	0.00801478		ENSBTAG00000012285	4.16885	-0.0131011	21.4321	8.14164e-05	0.00760321
ENSBTAG00000013371	-2.42388	2.88611	27.5719	1.52661e-05	0.00134094		ENSBTAG00000004499	-2.04586	6.45621	15.4956	0.00051928	0.0294794		ENSBTAG00000001058	2.46514	5.55213	14.7423	0.00067048	0.0301468		ENSBTAG00000009819	-4.20247	5.48027	21.7314	7.46529e-05	0.00801478		ENSBTAG00000016450	2.67886	1.22961	21.4128	8.18764e-05	0.00760321
ENSBTAG00000037743	-5.50491	1.82247	27.5647	1.5294e-05	0.00134094		ENSBTAG00000039967	3.4607	-1.39824	15.4776	0.000522437	0.0295523		ENSBTAG00000043548	3.01972	1.28881	14.7138	0.000677046	0.0302695		ENSBTAG00000011044	-2.78467	5.39833	21.6771	7.58328e-05	0.00801992		ENSBTAG00000013117	3.09425	3.83428	21.2588	8.56332e-05	0.00763652
ENSBTAG00000032613	-2.86696	4.78736	27.5217	1.54637e-05	0.00134101		ENSBTAG00000010948	-3.12679	2.86096	15.3563	0.0005442	0.0303483		ENSBTAG00000009115	2.09882	2.05445	14.6816	0.000684574	0.0302745		ENSBTAG00000010276	-2.96913	3.34853	21.6593	7.62253e-05	0.00801992		ENSBTAG00000007319	2.78708	2.47719	21.2583	8.56459e-05	0.00763652
ENSBTAG00000008866	-2.06745	4.70539	27.4218	1.58649e-05	0.00136076		ENSBTAG00000014538	-2.53188	-0.548705	15.2642	0.000560835	0.0309479		ENSBTAG00000023216	2.71019	1.03241	14.6319	0.000696361	0.0304431		ENSBTAG00000011392	4.72686	6.83163	21.4295	8.14793e-05	0.00830108		ENSBTAG00000015341	3.49277	1.99792	21.2389	8.61325e-05	0.00763676
ENSBTAG00000030182	-3.93349	1.85615	27.3656	1.60957e-05	0.00136571		ENSBTAG00000020737	2.98616	4.14255	15.2233	0.0005692	0.0312068		ENSBTAG00000007109	2.92854	4.99906	14.5511	0.000715997	0.0309585		ENSBTAG00000031696	2.68086	3.83536	21.413	8.18704e-05	0.00830108		ENSBTAG00000007799	-3.48045	3.49905	21.1102	8.9438e-05	0.00788553
ENSBTAG00000039995	-5.51695	6.42092	27.327	1.62564e-05	0.00137197		ENSBTAG00000017716	-2.29687	0.776896	15.209	0.000571953	0.0312068		ENSBTAG00000011833	2.02531	5.05349	14.4639	0.000737842	0.0315572		ENSBTAG00000013537	2.13373	4.09866	21.4088	8.19715e-05	0.00830108		ENSBTAG00000046333	4.43508	3.02108	20.7782	9.86064e-05	0.00827753
ENSBTAG00000026986	-5.42682	10.5606	27.2569	1.65524e-05	0.00138217		ENSBTAG00000011833	2.07755	5.05349	15.2035	0.000573012	0.0312068		ENSBTAG00000016739	-3.33003	-0.981933	14.3336	0.000771885	0.0323684		ENSBTAG00000015280	-3.66345	4.68833	21.3633	8.30646e-05	0.00830108		ENSBTAG00000001120	2.41284	5.03086	20.7269	0.000100111	0.00827753
ENSBTAG00000018369	-10.0908	6.56236	27.235	1.66458e-05	0.00138265		ENSBTAG00000012394	2.11465	-1.2775	15.1609	0.000578947	0.0312909		ENSBTAG00000012889	-3.79069	2.06677	14.269	0.00078936	0.0326973		ENSBTAG00000026067	5.383	-0.836201	21.9492	8.31055e-05	0.00830108		ENSBTAG00000006907	3.63895	9.48275	20.6521	0.00010235	0.00827753
ENSBTAG00000012263	-2.36424	4.73238	27.188	1.68489e-05	0.00138495		ENSBTAG00000013160	-2.29283	2.45519	15.1265	0.000588156	0.0316094		ENSBTAG00000007445	3.59338	-0.984294	14.1053	0.000835625	0.0340771		ENSBTAG00000014053	2.39495	0.285704	21.3013	8.44793e-05	0.00833283		ENSBTAG00000004221	-5.59679	5.48732	20.6389	0.00010275	0.00827753
ENSBTAG00000009230	-4.7375	4.46374	27.1037	1.72196e-05	0.00140453		ENSBTAG00000006541	-3.9589	7.88715	15.0679	0.000599974	0.0320976		ENSBTAG00000012097	2.25025	-0.0458248	14.0601	0.000848932	0.0340912		ENSBTAG00000014239	-4.19763	3.8106	21.1703	8.78767e-05	0.00856092		ENSBTAG00000008436	-2.5324	5.09581	20.5742	0.000104741	0.00827753
ENSBTAG00000012370	-9.67593	6.08456	27.04	1.75058e-05	0.00141246		ENSBTAG00000002574	-2.88127	7.16387	15.0048	0.000612991	0.0323391		ENSBTAG00000021582	-2.02249	5.70787	13.9274	0.000889249	0.0351732		ENSBTAG00000043562	2.92281	-0.409245	21.1273	8.89893e-05	0.00856359		ENSBTAG00000032340	-2.10469	4.03874	20.5706	0.00010485	0.00827753
ENSBTAG00000032761	-2.39153	0.234138	26.9655	1.7692e-05	0.00141246		ENSBTAG00000009148	-4.25378	0.564107	14.9779	0.000618627	0.0323391		ENSBTAG00000021066	2.57865	5.12912	13.8974	0.000898659	0.0354566		ENSBTAG00000016746	-4.05552	5.5634	21.0796	9.02412e-05	0.00863143		ENSBTAG00000021992	2.02812	7.00683	20.5129	0.000106662	0.00827753
ENSBTAG00000018223	-6.89182	7.27687	26.9947	1.7712e-05	0.00141246		ENSBTAG00000006130	-3.38891	3.87158	14.9426	0.0006261	0.0323971		ENSBTAG00000039462	-3.1609	4.81919	13.828	0.000920832	0.0359064		ENSBTAG00000006733	4.24934	4.39469	21.6099	9.13457e-05	0.00868445		ENSBTAG00000011274	-2.05366	3.04156	20.4954	0.000107219	0.00827753
ENSBTAG00000013921	-10.2756	8.24239	26.9928	1.77207e-05	0.00141246		ENSBTAG00000026813	-2.65607	1.32215	14.8977	0.00063576	0.0324361		ENSBTAG00000047700	4.0864	0.137953	14.0858	0.00092405	0.0359064		ENSBTAG00000015101	-2.14217	5.35523	20.9715	9.31505e-05	0.008769		ENSBTAG00000000238	3.205	3.26207	20.4565	0.000108463	0.00827753
ENSBTAG00000010444	-5.45091	6.02717	26.8888	1.82051e-05	0.00142941		ENSBTAG00000040279	-4.01395	2.25246	15.1264	0.00065235	0.0327078		ENSBTAG00000009198	2.77391	0.800075	13.8029	0.000928987	0.0359064		ENSBTAG00000018513	2.52388	8.86571	20.964	9.33566e-05	0.008769		ENSBTAG00000002981	-3.68264	4.70325	20.3684	0.000111344	0.00834834
ENSBTAG00000011548	-6.10869	5.9469	26.8667	1.83099e-05	0.00143053		ENSBTAG00000019347	-5.27355	2.48795	14.8202	0.000652829	0.0327078		ENSBTAG00000014581	2.50772	5.08278	13.7912	0.000932811	0.0359064		ENSBTAG00000035018	4.0513	0.128828	20.9442	9.39019e-05	0.008769		ENSBTAG00000024929	4.1442	3.75169	20.3484	0.000112009	0.00834834
ENSBTAG00000006453	-9.3623	0.505446	27.6943	1.85664e-05	0.00143635		ENSBTAG00000009230	-3.23268	4.46374	14.8001	0.00065733	0.0328291		ENSBTAG00000014897	2.61754	1.81614	13.6675	0.000974402	0.0362689		ENSBTAG00000024929	4.20628	3.75169	20.8628	9.61786e-05	0.00887375		ENSBTAG00000029926	5.6177	-1.17853	22.3576	0.000112018	0.00834834
ENSBTAG00000034106	-5.55995	-0.784128	26.4528	2.03956e-05	0.00153031		ENSBTAG00000013909	-2.11787	4.93768	14.7539	0.000667803	0.0330773		ENSBTAG00000024929	3.29873	3.75169	13.6482	0.000981066	0.036431		ENSBTAG00000027875	2.2461	5.8693	20.8153	9.75323e-05	0.00889743		ENSBTAG00000014003	2.3708	4.81264	20.2872	0.000114073	0.00836333
ENSBTAG00000040279	-8.27889	2.25246	27.2813	2.05567e-05	0.00153031		ENSBTAG00000014162	-3.49653	1.11704	14.7505	0.000668588	0.0330773		ENSBTAG00000017690	2.1275	4.55823	13.6256	0.000988938	0.0366357		ENSBTAG00000009383	-3.66594	5.04017	20.74	9.97239e-05	0.00904507		ENSBTAG00000019276	-3.72881	5.72649	20.2585	0.000115056	0.00836333
ENSBTAG00000010948	-4.43852	2.86096	26.3954	2.07041e-05	0.00153405		ENSBTAG00000008763	-6.23622	5.25338	15.0184	0.000676018	0.0331971		ENSBTAG00000025812	-3.04071	-1.33887	13.5256	0.00102454	0.037425		ENSBTAG00000005078	-2.02597	6.40209	20.6443	0.000102587	0.0092516		ENSBTAG00000001717	-2.32307	4.54994	20.2526	0.000115258	0.00836333
ENSBTAG00000047827	-2.5373	6.17749	26.3016	2.12202e-05	0.00155766		ENSBTAG00000006789	-3.1895	3.20544	14.6082	0.000702054	0.0337487		ENSBTAG00000004488	3.06221	4.15986	13.5174	0.00102753	0.037425		ENSBTAG00000021181	-3.19365	4.3398	20.5703	0.00010486	0.00929392		ENSBTAG00000013665	2.23255	0.286747	20.1346	0.000119168	0.00836333
ENSBTAG00000017655	-3.85468	3.45297	26.17	2.1967e-05	0.00160211		ENSBTAG00000003806	-2.33444	2.79069	14.5879	0.000706978	0.0337487		ENSBTAG00000002117	-2.20045	2.59855	13.4925	0.00103667	0.037425		ENSBTAG00000026971	-3.48648	4.03092	20.5273	0.000106206	0.00929392		ENSBTAG00000035319	-3.2546	4.32147	20.1232	0.000119807	0.00836333
ENSBTAG00000006024	-4.72215	5.00636	26.1593	2.20287e-05	0.00160211		ENSBTAG00000031217	-3.17255	9.11196	14.5569	0.000714572	0.0338645		ENSBTAG00000002184	2.03666	4.124	13.405	0.0010694	0.0380976		ENSBTAG00000047894	-6.94013	0.0918519	20.515	0.000106596	0.00929392		ENSBTAG00000030520	2.27043	4.52398	20.1085	0.000120335	0.00836333
ENSBTAG00000019585	-4.07166	6.35759	26.0868	2.24535e-05	0.00160634		ENSBTAG00000006419	-4.7338	5.67557	14.54	0.000718741	0.0338645		ENSBTAG00000030974	2.73248	5.67376	13.3933	0.00107387	0.0381707		ENSBTAG00000021310	2.29122	1.73209	20.4359	0.000109132	0.00929392		ENSBTAG00000021069	-2.74961	4.91053	20.0951	0.000120821	0.00836333
ENSBTAG00000026813	-3.77225	1.32215	26.0581	2.26241e-05	0.00160634		ENSBTAG00000034883	-3.1999	-1.14981	14.4926	0.000730586	0.0342461		ENSBTAG00000009786	-2.6802	2.6862	13.3482	0.00109125	0.0385284		ENSBTAG00000048237	2.47958	-0.128381	20.4272	0.000109266	0.00929392		ENSBTAG00000018216	-2.93085	2.99466	20.0824	0.00012128	0.00836333
ENSBTAG00000007893	-2.09791	7.3033	26.0541	2.26478e-05	0.00160634		ENSBTAG00000006864	-4.26693	6.02834	14.4899	0.000731273	0.0342461		ENSBTAG00000030208	-2.58417	2.28792	13.3347	0.00109649	0.0386266		ENSBTAG00000012184	-3.8143	2.65433	20.3755	0.000111109	0.00929392		ENSBTAG00000004079	2.76892	9.11776	20.0539	0.000122323	0.00836531
ENSBTAG00000006754	-2.33303	2.92265	26.0456	2.26989e-05	0.00160634		ENSBTAG00000013923	-2.50933	3.53575	14.4038	0.000753332	0.0349043		ENSBTAG00000018403	2.86008	-0.113428	13.2969	0.00111138	0.0388268		ENSBTAG00000015067	4.94515	-1.27192	20.9085	0.000111326	0.00929392		ENSBTAG00000009868	-4.74141	5.19564	20.0424	0.000122746	0.00836531
ENSBTAG00000021272	-7.59597	3.64596	26.025	2.28226e-05	0.00160634		ENSBTAG00000017743	-4.06544	6.9088	14.3031	0.00078008	0.0357884		ENSBTAG00000000440	2.39726	6.37123	13.2953	0.00111201	0.0388268		ENSBTAG00000008216	-4.22648	7.04048	20.363	0.000111523	0.00929392		ENSBTAG00000040290	-2.17343	1.74412	20.0035	0.000124185	0.00839745
ENSBTAG00000019658	-2.82714	4.0133	25.9952	2.3003e-05	0.00160634		ENSBTAG00000021526	-3.63653	3.26219	14.2359	0.000798485	0.0363161		ENSBTAG00000015818	-5.7223	0.0663868	13.2185	0.00114297	0.0391286		ENSBTAG00000016726	-3.74368	3.79447	20.357	0.000111726	0.00929392		ENSBTAG00000015293	-2.63864	1.90501	19.9695	0.000125461	0.00839745
ENSBTAG00000046321	-2.26252	3.92041	25.9746	2.31286e-05	0.001608		ENSBTAG00000013303	-2.06514	5.625	14.1876	0.000812004	0.0365621		ENSBTAG00000039696	2.82073	0.699716	13.1567	0.00116853	0.0395744		ENSBTAG00000018160	-2.65547	1.09612	20.2892	0.000114007	0.00933997		ENSBTAG00000013573	-2.75663	5.78505	19.8873	0.000128603	0.00845738
ENSBTAG00000017183	-5.45467	8.31921	25.8719	2.37651e-05	0.00162833		ENSBTAG00000009174	-2.27984	1.58442	14.0993	0.000837395	0.0370189		ENSBTAG00000007247	-2.13349	3.97682	13.1488	0.00117184	0.0396017		ENSBTAG00000045889	3.58876	3.8715	20.2368	0.000115804	0.00933997		ENSBTAG00000013798	-4.35885	0.0669412	19.8871	0.000128613	0.00845738
ENSBTAG00000021658	-2.52138	4.32264	25.8542	2.38766e-05	0.00162833		ENSBTAG00000012992	-2.92277	2.01639	14.0301	0.000857848	0.0373064		ENSBTAG00000007044	2.63968	-1.14709	13.1136	0.0011867	0.0398008		ENSBTAG00000007445	4.23574	-0.984294	20.1554	0.000118656	0.0093893		ENSBTAG00000026704	-2.36508	3.36671	19.8039	0.000131877	0.00850851
ENSBTAG00000047231	-6.15174	6.50686	25.7061	2.48333e-05	0.00166967		ENSBTAG00000016169	-2.90797	5.52957	14.0052	0.000865352	0.0373607		ENSBTAG00000021916	3.38473	7.23367	13.0948	0.00119473	0.0398008		ENSBTAG00000038849	3.99278	4.21308	20.1158	0.000120073	0.0093893		ENSBTAG00000004428	-2.62518	7.2442	19.7852	0.000132625	0.00850851
ENSBTAG00000015618	-2.78282	3.62305	25.6752	2.50379e-05	0.0016742		ENSBTAG00000048210	-3.45438	4.25743	13.9639	0.000877945	0.0374711		ENSBTAG00000008169	-2.02056	2.77934	13.0896	0.00119696	0.0398008		ENSBTAG00000003212	2.24559	7.60554	20.111	0.000120245	0.0093893		ENSBTAG00000014326	-3.32711	4.64397	19.7464	0.00013419	0.00857405
ENSBTAG00000002853	-4.26175	4.06775	25.6458	2.52345e-05	0.0016742		ENSBTAG00000012088	-2.65968	7.24712	13.9391	0.000885611	0.0374711		ENSBTAG00000011266	3.85843	1.90569	13.0557	0.00121163	0.0398374		ENSBTAG00000018204	4.44448	5.26335	20.5768	0.000122382	0.0093893		ENSBTAG00000037786	2.5466	0.6751	19.5788	0.000141173	0.00894774
ENSBTAG00000027126	-7.84452	-0.337372	26.4169	2.55103e-05	0.00168454		ENSBTAG00000010562	-3.08886	2.71906	13.9086	0.000895133	0.0376662		ENSBTAG00000021697	3.08092	3.3973	13.0094	0.00123199	0.0402554		ENSBTAG00000017446	-4.19086	4.01994	20.0425	0.000122741	0.0093893		ENSBTAG00000008428	-3.94829	1.12251	19.5464	0.000142568	0.00896392
ENSBTAG00000021430	-2.8304	1.495	25.5177	2.61104e-05	0.00171109		ENSBTAG00000046140	-2.29692	3.32429	13.8953	0.000899309	0.0376662		ENSBTAG00000020283	-2.40829	1.78047	13.002	0.00123528	0.0402793		ENSBTAG00000016924	2.27364	6.48523	20.042	0.000122761	0.0093893		ENSBTAG00000013124	3.36886	2.21162	19.5074	0.000144268	0.00896392
ENSBTAG00000011390	-5.97315	6.49934	25.4165	2.68254e-05	0.00173291		ENSBTAG00000000598	-2.25249	8.313	13.8939	0.000899769	0.0376662		ENSBTAG00000037778	-3.15624	1.42828	12.9693	0.00124988	0.0404286		ENSBTAG00000047972	2.30916	-0.151606	20.0151	0.000123329	0.0093893		ENSBTAG00000007210	3.48521	3.80676	19.4775	0.000145584	0.00900577
ENSBTAG00000005556	-3.27317	5.57628	25.3724	2.71436e-05	0.00173291		ENSBTAG00000002936	-2.15548	6.65911	13.8844	0.000902774	0.037692		ENSBTAG00000002224	-2.48066	5.60656	12.9234	0.00127075	0.0404973		ENSBTAG00000002880	3.646	3.36641	20.0153	0.000123747	0.0093893		ENSBTAG00000009155	4.3354	3.98778	19.3991	0.000149101	0.00909551
ENSBTAG00000027181	-2.24908	3.69431	25.3668	2.71844e-05	0.00173291		ENSBTAG00000007353	-2.763	-0.219088	13.7763	0.000937741	0.038742		ENSBTAG00000007353	-2.76793	-0.219088	12.8692	0.00129585	0.0404973		ENSBTAG00000000589	3.43209	3.41173	19.89	0.0001285	0.00965709		ENSBTAG00000020227	-3.51436	2.34935	19.3445	0.000151605	0.0092024
ENSBTAG00000013163	-3.15139	5.93462	25.3603	2.72312e-05	0.00173291		ENSBTAG00000017409	-2.30622	1.36472	13.7645	0.00094164	0.0388015		ENSBTAG00000047807	-2.84915	1.41101	12.8618	0.00129931	0.040525		ENSBTAG00000006185	-3.07062	5.24327	19.8377	0.000130542	0.00972457		ENSBTAG00000000507	-2.76673	3.36105	19.2991	0.000153718	0.00923591
ENSBTAG00000021823	-5.96987	4.16186	25.3138	2.75725e-05	0.00173519		ENSBTAG00000048125	-3.08497	1.27285	13.7437	0.000948557	0.0389847		ENSBTAG00000007828	3.11671	-1.65194	12.8491	0.00130454	0.0406081		ENSBTAG00000005825	-3.7657	2.65142	19.8287	0.000130897	0.00972457		ENSBTAG00000002258	-4.56574	3.42439	19.1246	0.000162147	0.00951234
ENSBTAG00000007052	2.21921	2.82204	25.2957	2.77068e-05	0.00173519		ENSBTAG00000005945	-2.12303	-0.311572	13.6469	0.000980394	0.0397016		ENSBTAG00000019347	-4.89293	2.48795	12.8375	0.00131079	0.0406591		ENSBTAG00000008934	-3.41024	5.44028	19.8036	0.00013189	0.00972457		ENSBTAG00000020125	2.04687	7.82178	19.1128	0.000162738	0.00951234
ENSBTAG00000012681	-2.70533	2.31924	25.0753	2.93953e-05	0.00180787		ENSBTAG00000006024	-3.12521	5.00636	13.6501	0.000980396	0.0397016		ENSBTAG00000007449	-3.73868	-0.677278	12.8261	0.00131622	0.0407305		ENSBTAG00000007782	3.61932	4.91387	19.7994	0.000132057	0.00972457		ENSBTAG00000008661	3.32319	0.261654	19.0456	0.00016613	0.0096748
ENSBTAG00000025337	-7.21003	4.24465	25.0696	2.94401e-05	0.00180787		ENSBTAG00000012700	-2.16583	4.04553	13.6481	0.000981094	0.0397016		ENSBTAG00000006563	2.97331	6.00494	12.7407	0.00135754	0.0414404		ENSBTAG00000044067	2.02736	0.629186	19.7801	0.000132479	0.00972457		ENSBTAG00000009819	-3.84337	5.48027	19.0207	0.000167404	0.00971314
ENSBTAG00000048068	-2.19062	2.47986	25.0237	2.98068e-05	0.00182		ENSBTAG00000039050	-2.14018	2.18733	13.578	0.0010057	0.0402841		ENSBTAG00000004770	2.80425	4.87711	12.7008	0.00137735	0.0416742		ENSBTAG00000005333	5.2225	7.87878	19.6812	0.000136861	0.00987065		ENSBTAG00000046900	2.57583	-0.349358	18.9601	0.000170344	0.00982408
ENSBTAG00000023806	-4.40186	5.60202	24.8878	3.09193e-05	0.00185539		ENSBTAG00000017390	-3.02216	3.48939	13.4636	0.00104736	0.0413237		ENSBTAG00000011465	2.87442	6.54617	12.616	0.00142047	0.0420599		ENSBTAG00000009797	2.70435	0.860252	19.6777	0.000137004	0.00987065		ENSBTAG00000012074	-2.93204	1.42749	18.9405	0.00017159	0.00982408
ENSBTAG00000006733	-9.31843	4.39469	25.6352	3.11144e-05	0.00186003		ENSBTAG00000039340	-5.22344	-0.834486	13.4946	0.00113149	0.0436872		ENSBTAG00000011044	-2.04956	5.39833	12.5586	0.00145047	0.0424699		ENSBTAG00000014581	3.05334	5.08278	19.6635	0.000137596	0.00987065		ENSBTAG00000023814	-2.00972	4.90903	18.9354	0.000171855	0.00982408
ENSBTAG00000038889	-2.40146	2.89469	24.7704	3.1917e-05	0.00188098		ENSBTAG00000001324	-2.82471	0.724409	13.2325	0.00113725	0.0436872		ENSBTAG00000002964	2.15603	3.97946	12.4524	0.00150784	0.0436078		ENSBTAG00000019371	3.54506	-1.91869	19.618	0.00013869	0.00990407		ENSBTAG00000016746	-3.77702	5.5634	18.9225	0.000172542	0.00982408
ENSBTAG00000009174	-3.18603	1.58442	24.7686	3.19324e-05	0.00188098		ENSBTAG00000024663	2.84539	1.74385	13.2233	0.00114098	0.0436872		ENSBTAG00000019585	2.53297	6.35759	12.4482	0.00151019	0.0436078		ENSBTAG00000018185	3.73649	1.16781	19.6038	0.000140107	0.00996019		ENSBTAG00000012394	2.3694	-1.2775	18.7749	0.000179587	0.0100052
ENSBTAG00000010880	-8.54922	7.25606	24.7675	3.19417e-05	0.00188098		ENSBTAG00000011944	-3.15423	1.63741	13.1731	0.00116167	0.044071		ENSBTAG00000001032	3.78457	5.42982	12.4459	0.00151144	0.0436078		ENSBTAG00000007237	-3.26232	5.23682	19.5872	0.000140815	0.00996565		ENSBTAG00000011992	2.44546	1.08752	18.7846	0.000180046	0.0100052
ENSBTAG00000022158	-5.57554	7.97655	24.6495	3.29798e-05	0.00193334		ENSBTAG00000015129	-4.20332	-0.60071	13.1423	0.00117457	0.0442327		ENSBTAG00000018765	2.76565	0.765093	12.4295	0.00152054	0.0436507		ENSBTAG00000004943	-3.70801	4.07534	19.5405	0.000142825	0.0100628		ENSBTAG00000006733	3.9546	4.39469	19.1876	0.000183457	0.010159
ENSBTAG00000009055	-3.09163	2.7716	24.6045	3.33857e-05	0.00193711		ENSBTAG00000012514	-2.66586	7.9684	13.081	0.0012007	0.044378		ENSBTAG00000039050	-2.05853	2.18733	12.4283	0.00152122	0.0436507		ENSBTAG00000019824	-3.22418	3.35404	19.4676	0.000146025	0.0101655		ENSBTAG00000009844	-2.09552	7.9751	18.6797	0.000185982	0.0102007
ENSBTAG00000045943	-4.74564	8.32658	24.5372	3.40024e-05	0.00196233		ENSBTAG00000037778	-3.08045	1.42828	13.0354	0.00122053	0.0447963		ENSBTAG00000047347	-2.46572	2.7753	12.3574	0.00156127	0.0441146		ENSBTAG00000032340	-2.04275	4.03874	19.4458	0.000146997	0.0101655		ENSBTAG00000047038	3.08444	-1.88835	18.6431	0.000187084	0.0102007
ENSBTAG00000007450	-4.79725	4.46652	24.4862	3.44772e-05	0.00197862		ENSBTAG00000000973	-6.87994	-2.55941	14.9105	0.00123378	0.0450677		ENSBTAG00000009292	-2.51418	2.01029	12.3089	0.00158929	0.0443919		ENSBTAG00000008507	-2.50594	5.23037	19.4188	0.000148208	0.0101655		ENSBTAG00000020223	2.30396	3.46766	18.6436	0.000188078	0.0102007
ENSBTAG00000000507	-3.15707	3.36105	24.4383	3.49299e-05	0.00199439		ENSBTAG00000002865	-3.77855	-0.00742791	12.9727	0.00124837	0.0451875		ENSBTAG00000012285	3.17031	-0.0131011	12.2993	0.00159492	0.0443919		ENSBTAG00000023938	-3.79896	4.88689	19.3752	0.000150192	0.0101655		ENSBTAG00000014053	2.23387	0.285704	18.6301	0.000188682	0.0102007
ENSBTAG00000010991	-11.1333	5.33088	24.4305	3.50048e-05	0.00199439		ENSBTAG00000011680	-2.54826	1.21612	12.7859	0.00133551	0.0470638		ENSBTAG00000038048	2.47021	3.2274	12.2777	0.00160759	0.0443919		ENSBTAG00000021582	-2.42193	5.70787	19.3424	0.000151699	0.0101655		ENSBTAG00000027715	-2.81459	3.50768	18.5873	0.000191391	0.0102391
ENSBTAG00000037533	-4.9396	7.32068	24.3301	3.5977e-05	0.00203075		ENSBTAG00000021420	-2.16005	-0.254414	12.7823	0.00133599	0.0470638		ENSBTAG00000001021	-4.24083	0.0236761	12.2502	0.00162398	0.0443919		ENSBTAG00000027201	2.12716	4.27865	19.3107	0.000153174	0.0101655		ENSBTAG00000004780	2.02706	-0.0186429	18.5151	0.000194789	0.0102398
ENSBTAG00000019636	-9.23074	4.26294	24.2374	3.69011e-05	0.00205822		ENSBTAG00000005365	-3.51515	-0.93769	12.5709	0.001444	0.0493378		ENSBTAG00000018843	4.47969	2.31851	12.4593	0.00162748	0.0443919		ENSBTAG00000009742	2.79895	4.77471	19.305	0.000153441	0.0101655		ENSBTAG00000010175	2.47756	4.25117	18.5188	0.000195516	0.0102398
ENSBTAG00000037399	-3.55083	4.74625	24.2367	3.69076e-05	0.00205822									ENSBTAG00000008216	-3.09807	7.04048	12.2428	0.00162841	0.0443919		ENSBTAG00000034192	2.69574	-1.03984	19.2803	0.000153964	0.0101655		ENSBTAG00000005034	2.02967	3.41217	18.4905	0.000197243	0.0102398
ENSBTAG00000021263	-2.11453	5.40146	24.1457	3.78403e-05	0.00209617									ENSBTAG00000020814	2.26605	2.1407	12.1772	0.00166822	0.0449282		ENSBTAG00000015396	3.13182	6.03551	19.2844	0.000154408	0.0101655		ENSBTAG00000035147	-2.14568	3.63542	18.4473	0.000199914	0.0103154
ENSBTAG00000015204	-7.99527	6.5993	24.1444	3.78538e-05	0.00209617									ENSBTAG00000006823	2.09038	5.98082	12.1645	0.00167608	0.0450627		ENSBTAG00000002298	-2.90214	4.7431	19.2779	0.000154718	0.0101655		ENSBTAG00000012443	-2.34739	5.7236	18.4458	0.000200008	0.0103154
ENSBTAG00000030333	-3.92229	5.41332	24.0255	3.91097e-05	0.00211516									ENSBTAG00000004958	3.43661	0.227586	12.1331	0.0016956	0.0452169		ENSBTAG00000021189	4.03862	2.92629	19.231	0.00015695	0.0101655		ENSBTAG00000042946	-2.2797	-0.759835	18.3932	0.000202227	0.010393
ENSBTAG00000015902	-3.4671	2.64853	24.0049	3.93323e-05	0.00211516									ENSBTAG00000021193	-2.55681	3.12664	12.1323	0.00169613	0.0452169		ENSBTAG00000046286	-2.37537	3.75125	19.2035	0.000158278	0.0101655		ENSBTAG00000046396	-3.96622	1.26571	18.4009	0.000202829	0.010393
ENSBTAG00000045889	-4.77198	3.8715	24.0033	3.93493e-05	0.00211516									ENSBTAG00000016169	-2.68873	5.52957	12.0916	0.00172179	0.0456695		ENSBTAG00000006434	2.09355	8.7983	19.2027	0.000158318	0.0101655		ENSBTAG00000016768	3.43208	2.4175	18.3889	0.000203586	0.010398
ENSBTAG00000002473	3.36372	2.89126	23.986	3.9537e-05	0.00211516									ENSBTAG00000000983	4.56226	2.06587	12.0857	0.00172554	0.0456921		ENSBTAG00000007799	-3.28312	3.49905	19.2015	0.000158375	0.0101655		ENSBTAG00000018160	-2.48359	1.09612	18.3689	0.000204866	0.0104296
ENSBTAG00000004488	-5.75609	4.15986	23.9255	4.0201e-05	0.00212903									ENSBTAG00000021686	-2.22315	3.77113	12.0724	0.00173408	0.0456934		ENSBTAG00000007783	-2.60993	6.23383	19.1738	0.000159722	0.0101655		ENSBTAG00000002749	3.31591	-1.00483	18.7733	0.000207551	0.0104656
ENSBTAG00000021787	-2.70603	2.43472	23.8327	4.12434e-05	0.00216968									ENSBTAG00000031573	2.9205	3.63192	12.0589	0.00174275	0.0457504		ENSBTAG00000023216	3.10902	1.03241	19.1598	0.000160411	0.0101655		ENSBTAG00000020061	4.39129	-0.936104	18.327	0.000207561	0.0104656
ENSBTAG00000017816	-2.85059	4.31775	23.7427	4.2282e-05	0.00218785									ENSBTAG00000002613	-2.18699	4.39308	12.053	0.00174655	0.0457504		ENSBTAG00000021708	-2.80734	4.57795	19.1589	0.000160452	0.0101655		ENSBTAG00000021582	-2.34714	5.70787	18.2956	0.000209611	0.0105353
ENSBTAG00000005615	-2.86945	2.3839	23.7202	4.25458e-05	0.00219192									ENSBTAG00000046725	2.97052	8.15507	11.9911	0.00178709	0.0463118		ENSBTAG00000009292	-3.26687	2.01029	19.1056	0.000163095	0.0102548		ENSBTAG00000005825	-3.55353	2.65142	18.2675	0.000211461	0.0105946
ENSBTAG00000021685	-4.61198	6.1248	23.7124	4.26384e-05	0.00219192									ENSBTAG00000005762	2.51325	-0.386367	11.9711	0.00180042	0.0463466		ENSBTAG00000009983	-2.55176	4.95458	19.0574	0.000165527	0.0102762		ENSBTAG00000047322	-3.4116	4.2611	18.2206	0.000214588	0.0106536
ENSBTAG00000010963	-3.66088	2.97855	23.6797	4.30255e-05	0.00220452									ENSBTAG00000020510	2.40251	-1.19697	11.9606	0.00180746	0.0463466		ENSBTAG00000012394	2.38471	-1.2775	19.0174	0.000166635	0.0102762		ENSBTAG00000039462	-3.7427	4.81919	18.1913	0.000216568	0.0106536
ENSBTAG00000002744	-2.9706	4.6084	23.6384	4.35215e-05	0.00220452									ENSBTAG00000001938	-2.11404	5.32775	11.9601	0.00180774	0.0463466		ENSBTAG00000017812	3.07522	1.69718	19.0219	0.000167341	0.0102762		ENSBTAG00000024340	3.23695	0.265297	18.1853	0.000216978	0.0106536
ENSBTAG00000046264	-4.68476	2.41709	23.6243	4.36912e-05	0.00220452									ENSBTAG00000015700	3.14841	1.22581	11.8965	0.00185103	0.0470093		ENSBTAG00000024726	-3.80727	4.69964	18.9284	0.000172227	0.0104542		ENSBTAG00000039080	2.77162	0.405959	18.1825	0.00021717	0.0106536
ENSBTAG00000021066	-3.77137	5.12912	23.6218	4.37217e-05	0.00220452									ENSBTAG00000023806	2.58	5.60202	11.7819	0.00193172	0.0483145		ENSBTAG00000021686	-2.87478	3.77113	18.8827	0.00017467	0.01049		ENSBTAG00000000698	2.88836	5.90931	18.0818	0.000224145	0.0108511
ENSBTAG00000006472	-2.50939	1.87154	23.5925	4.40785e-05	0.00221543									ENSBTAG00000009797	2.06484	0.860252	11.6792	0.0020074	0.0494589		ENSBTAG00000036304	4.62252	-1.59621	18.8214	0.000178005	0.01049		ENSBTAG00000025042	2.69678	-1.81943	18.047	0.000225435	0.0108636
ENSBTAG00000010050	-2.41365	6.91125	23.5529	4.4566e-05	0.00223283									ENSBTAG00000004019	-3.00902	3.78565	11.6734	0.00201173	0.0494589		ENSBTAG00000006065	-2.15582	6.25757	18.805	0.000178911	0.01049		ENSBTAG00000023216	3.00799	1.03241	18.0179	0.000228701	0.0108928
ENSBTAG00000000598	-3.02307	8.313	23.4998	4.52284e-05	0.00225172									ENSBTAG00000006019	2.50883	1.64465	11.665	0.00201806	0.0494589		ENSBTAG00000023002	2.14395	5.691	18.795	0.000179464	0.01049		ENSBTAG00000016142	2.79031	3.13445	18.0163	0.000228813	0.0108928
ENSBTAG00000012319	-6.90282	3.62209	23.4071	4.64104e-05	0.00227169									ENSBTAG00000002865	-3.69126	-0.00742791	11.6607	0.00202135	0.0494589		ENSBTAG00000016142	2.85368	3.13445	18.7583	0.000181511	0.0105495		ENSBTAG00000018460	2.06509	5.10428	17.9636	0.00023265	0.010993
ENSBTAG00000025642	-2.56239	4.30029	23.3862	4.66813e-05	0.00227169																ENSBTAG00000046911	3.07571	-0.618639	18.7231	0.000183501	0.0105694		ENSBTAG00000047400	-2.85516	0.111545	17.8916	0.000237997	0.0111618
ENSBTAG00000007547	-7.81695	5.04941	23.3823	4.67321e-05	0.00227169																ENSBTAG00000003971	-2.2488	3.6095	18.6816	0.000185876	0.0106673		ENSBTAG00000003043	-2.23004	6.17879	17.8425	0.000241717	0.0111809
ENSBTAG00000031217	-4.22823	9.11196	23.3594	4.70308e-05	0.00227169																ENSBTAG00000011059	-2.00947	4.10907	18.6503	0.000187688	0.0107322		ENSBTAG00000037986	2.41881	-0.266336	17.834	0.000241957	0.0111809
ENSBTAG00000005168	-4.50637	1.50439	23.2848	4.80209e-05	0.00230128																ENSBTAG00000020701	3.92754	6.47119	18.5777	0.000191967	0.0108589		ENSBTAG00000007344	-2.34694	1.45114	17.835	0.000242293	0.0111809
ENSBTAG00000002157	-7.49884	5.48895	23.1573	4.97642e-05	0.00233971																ENSBTAG00000047462	-2.07266	6.1447	18.5426	0.000194071	0.0108663		ENSBTAG00000007281	2.26154	2.98515	17.8102	0.0002442	0.0111875
ENSBTAG00000000634	-2.74804	1.83989	23.142	4.9978e-05	0.00234051																ENSBTAG00000013147	-4.43372	2.12867	18.5238	0.000195211	0.0108663		ENSBTAG00000007247	-2.52856	3.97682	17.8055	0.000244562	0.0111875
ENSBTAG00000019577	-6.48933	2.01737	23.1246	5.0222e-05	0.00234498																ENSBTAG00000004508	2.72602	-0.123907	18.941	0.000197408	0.0108663		ENSBTAG00000022580	2.51702	3.94752	17.7342	0.000250154	0.0113277
ENSBTAG00000048125	-4.60712	1.27285	23.0662	5.10511e-05	0.00235542																ENSBTAG00000013339	2.65109	0.147891	18.4866	0.000197482	0.0108663		ENSBTAG00000038849	3.69838	4.21308	17.6873	0.000253899	0.0113836
ENSBTAG00000007090	-8.84816	6.40816	23.0396	5.14341e-05	0.00235542																ENSBTAG00000004499	-2.25258	6.45621	18.4665	0.000198724	0.0108663		ENSBTAG00000037397	2.28063	-0.550305	17.6528	0.000255549	0.0114252
ENSBTAG00000002574	-3.72681	7.16387	23.0267	5.16204e-05	0.00235542																ENSBTAG00000004899	3.04133	3.4624	18.4574	0.000199284	0.0108663		ENSBTAG00000027080	2.38498	4.62313	17.6473	0.000257151	0.0114643
ENSBTAG00000015059	-8.65588	2.65073	22.8797	5.37994e-05	0.00243284																ENSBTAG00000018806	-2.10177	3.33019	18.4541	0.000199491	0.0108663		ENSBTAG00000004038	3.05997	3.07086	17.5837	0.000262406	0.0115356
ENSBTAG00000032531	-6.09466	2.49536	22.8132	5.48182e-05	0.00245849																ENSBTAG00000006019	3.2021	1.64465	18.422	0.000201495	0.0108904		ENSBTAG00000006185	-2.85425	5.24327	17.5694	0.000263598	0.0115435
ENSBTAG00000018016	-3.41245	6.80873	22.7748	5.54155e-05	0.00246235																ENSBTAG00000009355	2.39677	5.41888	18.4083	0.000202357	0.010896		ENSBTAG00000017896	2.32393	3.68626	17.5394	0.000266126	0.0116022
ENSBTAG00000038849	-6.13487	4.21308	22.7589	5.56639e-05	0.00246235																ENSBTAG00000009035	-3.53172	4.16656	18.3803	0.000204136	0.0109209		ENSBTAG00000047003	2.80851	-0.10848	17.508	0.000268812	0.0116819
ENSBTAG00000003956	-2.46073	6.43404	22.7208	5.62674e-05	0.00247498																ENSBTAG00000021316	2.36149	0.41532	18.3041	0.000209057	0.0110716		ENSBTAG00000013147	-4.24793	2.12867	17.4921	0.000270175	0.0116819
ENSBTAG00000006592	-2.17709	0.622264	22.7073	5.62996e-05	0.00247498																ENSBTAG00000020067	2.14884	0.765377	18.2927	0.000209804	0.011074		ENSBTAG00000002298	-2.73606	4.7431	17.4554	0.00027336	0.0117442
ENSBTAG00000019453	-3.6302	5.03093	22.6848	5.68432e-05	0.00248953																ENSBTAG00000002620	-3.19458	2.30757	18.2523	0.000212467	0.0110846		ENSBTAG00000001938	-2.60796	5.32775	17.4424	0.000274498	0.0117442
ENSBTAG00000002127	-2.09987	4.20118	22.6784	5.69459e-05	0.00248953																ENSBTAG00000008181	-2.11525	4.84313	18.246	0.00021289	0.0110846		ENSBTAG00000005269	-3.24085	3.89434	17.385	0.000279574	0.0118291
ENSBTAG00000033008	-4.43168	8.31405	22.5257	5.9464e-05	0.00254325																ENSBTAG00000017743	4.46296	6.9088	18.2285	0.000214063	0.0110846		ENSBTAG00000000660	-3.03802	4.08455	17.3541	0.000282356	0.0118514
ENSBTAG00000017509	-4.48467	6.52222	22.4196	6.12844e-05	0.002593																ENSBTAG00000004770	3.44145	4.87711	18.2261	0.000214221	0.0110846		ENSBTAG00000015396	2.94584	6.03551	17.326	0.000284911	0.0118976
ENSBTAG00000047379	-5.09009	4.7538	22.4003	6.16223e-05	0.00260033																ENSBTAG00000021193	-3.2679	3.12664	18.2256	0.000214254	0.0110846		ENSBTAG00000019824	-2.99286	3.35404	17.3074	0.000286613	0.0119349
ENSBTAG00000019840	2.66978	-1.40899	22.2959	6.30464e-05	0.00261598																ENSBTAG00000013614	2.0757	4.92416	18.1656	0.000218326	0.0112072		ENSBTAG00000015280	-3.19674	4.68833	17.2124	0.00029548	0.0122717
ENSBTAG00000004035	-2.55783	5.67772	22.3155	6.31303e-05	0.00261598																ENSBTAG00000000698	2.88945	5.90931	18.0924	0.000223403	0.0114037		ENSBTAG00000046910	-3.22366	4.75843	17.1616	0.00030035	0.0124413
ENSBTAG00000003369	-5.01009	1.90296	22.3125	6.31833e-05	0.00261598																ENSBTAG00000010077	-3.05282	4.16211	18.0839	0.000223999	0.0114037		ENSBTAG00000017032	3.53243	1.72325	17.0911	0.00030724	0.0126933
ENSBTAG00000029826	-5.09926	3.30777	22.3115	6.32013e-05	0.00261598																ENSBTAG00000021588	-4.60328	0.048542	18.0638	0.000225418	0.0114391		ENSBTAG00000012889	-4.25209	2.06677	17.0448	0.00031187	0.0127842
ENSBTAG00000017390	-4.09902	3.48939	22.183	6.55651e-05	0.00268564																ENSBTAG00000006472	-2.17932	1.87154	18.0365	0.000227362	0.0114685		ENSBTAG00000007423	2.54719	-1.14675	17.0073	0.000314977	0.0128449
ENSBTAG00000004377	-2.02787	4.20853	22.0389	6.83268e-05	0.00271621																ENSBTAG00000020194	2.39199	2.78316	18.0353	0.000227452	0.0114685		ENSBTAG00000001003	2.1671	0.508603	16.9678	0.000319718	0.0130046
ENSBTAG00000006030	-4.98656	8.84094	21.8502	7.2137e-05	0.00279036																ENSBTAG00000039091	-2.07696	1.41487	18.0226	0.000228359	0.0114776		ENSBTAG00000011720	2.93696	-0.269728	16.9442	0.000322168	0.0130522
ENSBTAG00000006864	-5.86934	6.02834	21.8184	7.28007e-05	0.00280915																ENSBTAG00000011266	4.58087	1.90569	17.9331	0.000234893	0.0117279		ENSBTAG00000046408	2.50886	-0.285727	16.8832	0.000328595	0.0131745
ENSBTAG00000015470	-4.18888	6.16924	21.7014	7.53014e-05	0.00288448																ENSBTAG00000027715	-2.75728	3.50768	17.9064	0.000236884	0.0117279		ENSBTAG00000004770	3.28292	4.87711	16.8007	0.000337498	0.0132862
ENSBTAG00000013929	-5.2004	5.87949	21.5044	7.97253e-05	0.00303919																ENSBTAG00000047347	-3.08266	2.7753	17.892	0.000237961	0.0117279		ENSBTAG00000017719	2.50005	5.51824	16.7999	0.000337585	0.0132862
ENSBTAG00000000623	-2.01063	2.89466	21.4743	8.04252e-05	0.00305113																ENSBTAG00000019262	-3.85331	6.52892	17.8843	0.000238541	0.0117279		ENSBTAG00000007121	-2.03301	4.96055	16.7043	0.000348247	0.0135344
ENSBTAG00000013117	-3.72118	3.83428	21.4415	8.11939e-05	0.00307291																ENSBTAG00000006551	-3.78385	3.8634	17.8637	0.000240104	0.0117316		ENSBTAG00000008499	-2.7552	4.47857	16.6874	0.000350169	0.0135344
ENSBTAG00000015214	-6.12239	7.5673	21.4275	8.15262e-05	0.0030781																ENSBTAG00000002224	-2.98179	5.60656	17.7917	0.00024563	0.0119154		ENSBTAG00000012184	-3.33402	2.65433	16.6831	0.000350654	0.0135344
ENSBTAG00000019964	-2.3583	4.99594	21.3854	8.25314e-05	0.00309774																ENSBTAG00000001631	-2.56716	5.50575	17.7783	0.000246678	0.0119154		ENSBTAG00000017133	-2.47416	3.77891	16.6604	0.000353252	0.0135645
ENSBTAG00000014912	-2.32572	10.5701	21.3811	8.26352e-05	0.00309774																ENSBTAG00000002117	-2.57541	2.59855	17.7502	0.000248881	0.0119414		ENSBTAG00000019777	-3.0325	4.5556	16.5988	0.000360427	0.0136737
ENSBTAG00000015926	-3.92965	6.33474	21.3218	8.40754e-05	0.00312943																ENSBTAG00000037397	2.28532	-0.550305	17.6846	0.000252972	0.0120347		ENSBTAG00000017026	-3.54997	2.79694	16.5427	0.000367087	0.0137744
ENSBTAG00000014642	-3.23359	2.57072	21.2962	8.47042e-05	0.00313803																ENSBTAG00000015341	3.15506	1.99792	17.6951	0.00025327	0.0120347		ENSBTAG00000034674	4.20307	-1.34833	16.5397	0.000367445	0.0137744
ENSBTAG00000005238	-3.2754	0.362625	21.2418	8.60599e-05	0.00316056																ENSBTAG00000013100	-3.44501	4.98018	17.5521	0.000265059	0.0123762		ENSBTAG00000031573	3.48051	3.63192	16.4579	0.000377412	0.0139817
ENSBTAG00000040028	-7.91995	5.29016	21.2358	8.62116e-05	0.00316056																ENSBTAG00000021480	2.73836	1.05418	17.5115	0.000268506	0.0125002		ENSBTAG00000011635	-2.72474	2.48829	16.4514	0.000378222	0.0139817
ENSBTAG00000043490	-3.13923	-0.688152	21.2196	8.6391e-05	0.00316056																ENSBTAG00000006404	-2.17392	4.42732	17.4733	0.000271803	0.0125421		ENSBTAG00000004943	-3.30919	4.07534	16.4065	0.000383824	0.0140957
ENSBTAG00000011784	-4.33698	0.562547	21.2238	8.6514e-05	0.00316056																ENSBTAG00000015743	2.08337	5.04082	17.4373	0.000274942	0.0126138		ENSBTAG00000014239	-3.52446	3.8106	16.3969	0.000385039	0.0140957
ENSBTAG00000006419	-6.49247	5.67557	21.0649	9.06313e-05	0.00328357																ENSBTAG00000016125	3.65193	0.318085	17.8098	0.000277942	0.0126918		ENSBTAG00000021686	-2.64284	3.77113	16.3904	0.000385855	0.0140957
ENSBTAG00000032515	-2.23461	4.68698	20.9903	9.26379e-05	0.00332778																ENSBTAG00000012925	-3.08401	4.1426	17.3825	0.000279799	0.0127067		ENSBTAG00000008758	-3.2227	6.07049	16.3155	0.000395464	0.0142879
ENSBTAG00000001865	-2.73104	4.76345	20.9896	9.26556e-05	0.00332778																ENSBTAG00000046594	-3.39528	2.88573	17.3782	0.000280188	0.0127067		ENSBTAG00000002030	4.60647	-1.61805	16.6536	0.000398422	0.0143037
ENSBTAG00000006349	-2.23485	2.95301	20.9759	9.30292e-05	0.00332778																ENSBTAG00000017946	-2.64066	-0.444805	17.2436	0.000292453	0.0130381		ENSBTAG00000009742	2.54537	4.77471	16.2631	0.000402334	0.0143657
ENSBTAG00000047635	-2.66347	-0.559385	20.9195	9.39846e-05	0.00334162																ENSBTAG00000046014	2.00361	2.33689	17.2088	0.000295829	0.0131145		ENSBTAG00000018358	2.7452	6.11834	16.2501	0.000404062	0.0143697
ENSBTAG00000005567	4.77711	0.76929	20.9225	9.45028e-05	0.00334162																ENSBTAG00000010109	-3.29333	4.04655	17.1055	0.000305817	0.0132008		ENSBTAG00000009917	2.67532	2.09597	16.2486	0.000404266	0.0143697
ENSBTAG00000003832	-2.60292	5.60452	20.8017	9.79247e-05	0.00340407																ENSBTAG00000011448	-2.13263	1.75292	17.0934	0.000307015	0.0132008		ENSBTAG00000014466	3.26321	-1.08123	16.584	0.000407304	0.0144302
ENSBTAG00000006686	-3.23298	0.823719	20.7936	9.81599e-05	0.00340475																ENSBTAG00000012443	-2.25064	5.7236	17.0786	0.000308486	0.0132008		ENSBTAG00000001344	3.50688	0.429528	16.2158	0.000408649	0.0144302
ENSBTAG00000013848	-3.7288	4.14124	20.757	9.92248e-05	0.00342662																ENSBTAG00000020710	-2.00756	2.82558	17.0755	0.000308788	0.0132008		ENSBTAG00000000589	3.05768	3.41173	16.204	0.000410248	0.0144302
ENSBTAG00000011392	-5.22004	6.83163	20.7109	0.000100586	0.00345608																ENSBTAG00000025337	3.72179	4.24465	17.0384	0.00031251	0.0132008		ENSBTAG00000013183	3.14138	2.64214	16.2018	0.000410541	0.0144302
ENSBTAG00000014682	-3.81332	2.4027	20.5209	0.00010641	0.00359607																ENSBTAG00000017896	2.28721	3.68626	17.0244	0.000313922	0.0132008		ENSBTAG00000002849	2.74345	-0.664516	16.1536	0.000417116	0.0144589
ENSBTAG00000047412	-4.42355	5.57199	20.5028	0.000106981	0.00360296																ENSBTAG00000046325	-2.51378	4.4008	17.0191	0.000314463	0.0132008		ENSBTAG00000019244	2.68027	1.28384	16.0901	0.000425959	0.0145076
ENSBTAG00000023177	-5.37263	2.61781	20.4905	0.000107373	0.00360296																ENSBTAG00000014453	-2.24931	5.28077	17.0097	0.000315422	0.0132008		ENSBTAG00000018947	-2.90085	1.78854	16.0731	0.00042837	0.0145076
ENSBTAG00000015074	-4.59366	5.38987	20.476	0.000107838	0.00360296																ENSBTAG00000013569	-3.7989	-1.17175	17.0079	0.000315604	0.0132008		ENSBTAG00000014581	2.72506	5.08278	16.0573	0.000430608	0.0145522
ENSBTAG00000000910	-3.02182	0.738939	20.4617	0.000108297	0.0036058																ENSBTAG00000035013	-3.60654	1.91831	17.0043	0.000315968	0.0132008		ENSBTAG00000019602	2.30329	-0.341773	15.9412	0.000447505	0.0148538
ENSBTAG00000001085	-2.59241	3.23335	20.4213	0.000109606	0.00364169																ENSBTAG00000013009	-2.50564	4.50523	16.9983	0.00031658	0.0132008		ENSBTAG00000018253	2.36509	7.92349	15.9378	0.000448003	0.0148538
ENSBTAG00000012348	-2.1594	3.06822	20.4006	0.000110282	0.00365644																ENSBTAG00000002744	2.31219	4.6084	16.9928	0.000317146	0.0132008		ENSBTAG00000011266	4.28831	1.90569	15.9044	0.000453006	0.0149881
ENSBTAG00000006789	-3.96932	3.20544	20.351	0.000111924	0.00367233																ENSBTAG00000008652	2.17509	6.27097	16.9859	0.000317849	0.0132008		ENSBTAG00000000843	2.03016	3.06694	15.8462	0.000461862	0.0151226
ENSBTAG00000002758	-4.23681	4.29992	20.2854	0.000114134	0.00372932																ENSBTAG00000015228	2.46302	-0.909597	16.9566	0.000319863	0.0132197		ENSBTAG00000009355	2.2067	5.41888	15.8137	0.000466877	0.0152105
ENSBTAG00000003700	-2.44028	1.21883	20.2706	0.000114641	0.00373816																ENSBTAG00000018460	2.00332	5.10428	16.9635	0.000320159	0.0132197		ENSBTAG00000002331	-3.46698	4.43896	15.7773	0.000472567	0.0153143
ENSBTAG00000014278	-2.17285	1.96176	20.2525	0.000115261	0.00375061																ENSBTAG00000004869	3.00559	1.33338	16.7047	0.000348199	0.0139121		ENSBTAG00000009277	-3.01426	3.31345	15.7018	0.000484633	0.0154929
ENSBTAG00000001058	-3.05867	5.55213	20.1535	0.000118723	0.00383952																ENSBTAG00000013802	3.81072	1.94273	16.6898	0.000349887	0.0139442		ENSBTAG00000011392	3.89092	6.83163	15.6864	0.000487128	0.0154929
ENSBTAG00000017427	-4.35033	3.08406	20.0684	0.000121791	0.00389311																ENSBTAG00000004464	-2.31189	1.93525	16.6555	0.00035382	0.0140191		ENSBTAG00000004750	2.10702	1.52227	15.6832	0.000487644	0.0154929
ENSBTAG00000003946	-2.01772	3.52603	20.03	0.000123204	0.00392808																ENSBTAG00000046766	-2.7026	1.49678	16.648	0.000354681	0.0140191		ENSBTAG00000012925	-2.885	4.1426	15.5982	0.000501719	0.0157032
ENSBTAG00000021855	-3.54365	0.0266897	19.9991	0.000124351	0.00395453																ENSBTAG00000005877	2.52276	-0.53041	16.6363	0.000356045	0.0140191		ENSBTAG00000037651	2.6913	6.2006	15.5937	0.000502479	0.0157032
ENSBTAG00000010758	-3.99936	3.69017	19.9863	0.00012483	0.00395596																ENSBTAG00000019901	-2.33045	3.93637	16.5931	0.000361094	0.0141761		ENSBTAG00000004899	2.75845	3.4624	15.5034	0.000517922	0.0159334
ENSBTAG00000010531	-4.75701	2.84981	19.9269	0.000127079	0.00399109																ENSBTAG00000035147	-2.02314	3.63542	16.5632	0.000364638	0.0142797		ENSBTAG00000020701	3.51264	6.47119	15.4228	0.000532136	0.0161167
ENSBTAG00000020679	-2.79485	1.53922	19.9242	0.000127184	0.00399109																ENSBTAG00000009702	4.65036	8.68963	16.5335	0.000368195	0.0143132		ENSBTAG00000004499	-2.04021	6.45621	15.3905	0.000537964	0.0161167
ENSBTAG00000015132	-5.28643	2.58961	19.9113	0.000127679	0.00399808																ENSBTAG00000006194	-2.05915	4.28245	16.5265	0.00036903	0.0143132		ENSBTAG00000017040	-2.31555	3.37424	15.3731	0.000541117	0.0161167
ENSBTAG00000024560	-3.87191	0.509458	19.8984	0.000128176	0.00399919																ENSBTAG00000011465	3.35388	6.54617	16.5108	0.000370934	0.0143132		ENSBTAG00000005129	-3.16952	4.05939	15.3725	0.000541239	0.0161167
ENSBTAG00000021378	-2.40705	6.33964	19.8972	0.000128221	0.00399919																ENSBTAG00000047491	2.72156	5.16773	16.4939	0.000372986	0.0143348		ENSBTAG00000007237	-2.81988	5.23682	15.3436	0.000546521	0.0162433
ENSBTAG00000038462	-4.24437	4.99633	19.8451	0.000130248	0.0040544																ENSBTAG00000011635	-2.73551	2.48829	16.4817	0.000374483	0.0143449		ENSBTAG00000017512	2.47953	1.52209	15.3194	0.000551006	0.0162929
ENSBTAG00000029886	-2.36735	1.28431	19.7857	0.000132606	0.0041035																ENSBTAG00000019591	2.46041	0.128549	16.4183	0.000382336	0.0144618		ENSBTAG00000020141	3.23034	1.52685	15.3179	0.000551288	0.0162929
ENSBTAG00000006907	-3.56219	9.48275	19.7251	0.000135057	0.00414683																ENSBTAG00000047038	2.92487	-1.88835	16.3905	0.000384073	0.0144618		ENSBTAG00000002978	3.15626	-0.543223	15.2592	0.000562316	0.0165568
ENSBTAG00000037650	-5.57547	-1.63008	20.2086	0.000136066	0.00416971																ENSBTAG00000044027	2.69906	3.46631	16.4009	0.000384524	0.0144618		ENSBTAG00000013015	3.55984	2.34693	15.2507	0.000563933	0.0165735
ENSBTAG00000018214	-4.80295	5.84501	19.6676	0.000137425	0.00419565																ENSBTAG00000047807	-3.34249	1.41101	16.378	0.000387433	0.0144618		ENSBTAG00000011465	3.19957	6.54617	15.2265	0.000568576	0.0165819
ENSBTAG00000001078	-3.25208	7.48414	19.6607	0.000137711	0.00419565																ENSBTAG00000016619	-3.36836	2.63532	16.3738	0.00038796	0.0144618		ENSBTAG00000013009	-2.3519	4.50523	15.2234	0.000569181	0.0165819
ENSBTAG00000006563	-4.13924	6.00494	19.6024	0.000140167	0.00423776																ENSBTAG00000044175	-3.13456	3.13987	16.3733	0.000388026	0.0144618		ENSBTAG00000014547	3.4392	4.90443	15.2109	0.000571578	0.0165819
ENSBTAG00000006921	-2.04098	6.02534	19.4597	0.000146376	0.00434231																ENSBTAG00000005456	-3.32113	3.95957	16.3588	0.000389877	0.0144618		ENSBTAG00000000044	4.07107	1.20676	15.5228	0.000572841	0.0165819
ENSBTAG00000008686	-3.19888	3.44494	19.3962	0.00014923	0.00439603																ENSBTAG00000019743	-2.90917	3.81665	16.3481	0.000391245	0.0144618		ENSBTAG00000016801	2.65963	2.08736	15.2005	0.000573595	0.0165819
ENSBTAG00000011680	-3.26436	1.21612	19.2886	0.000154214	0.00450664																ENSBTAG00000012467	-2.32498	4.14589	16.3406	0.000392214	0.0144618		ENSBTAG00000042368	-2.27094	-0.906289	15.172	0.000577012	0.0165819
ENSBTAG00000002551	-2.50308	1.42593	19.2828	0.000154486	0.00450664																ENSBTAG00000008920	4.04578	5.46051	16.3336	0.000393112	0.0144618		ENSBTAG00000009182	4.0977	-1.275	15.1807	0.000577466	0.0165819
ENSBTAG00000005085	-2.38917	3.90646	19.2473	0.000156168	0.00454733																ENSBTAG00000030210	2.31319	-0.377567	16.3185	0.000394035	0.014462		ENSBTAG00000010188	4.91651	-0.233003	15.8796	0.000577875	0.0165819
ENSBTAG00000016142	-3.30151	3.13445	19.1999	0.00015845	0.00459678																ENSBTAG00000007121	-2.00627	4.96055	16.2893	0.000398878	0.0145843		ENSBTAG00000011082	3.12938	0.762357	15.1399	0.000585503	0.0166629
ENSBTAG00000006662	-2.40222	2.57247	19.1821	0.000159316	0.00460158																ENSBTAG00000000580	2.49408	-0.0314863	16.2255	0.000407345	0.0147786		ENSBTAG00000019772	2.159	3.68351	15.1382	0.000585838	0.0166629
ENSBTAG00000005525	-2.61911	-0.935895	19.1641	0.000159781	0.00460158																ENSBTAG00000013015	3.67651	2.34693	16.1294	0.000420471	0.0151304		ENSBTAG00000008934	-2.89526	5.44028	15.1141	0.000590633	0.016735
ENSBTAG00000003806	-2.72107	2.79069	19.0954	0.000163607	0.00466074																ENSBTAG00000003458	-2.82438	4.18424	16.1265	0.000420875	0.0151304		ENSBTAG00000018603	2.11707	3.05009	15.0746	0.000598606	0.0169002
ENSBTAG00000012237	-2.0429	8.92038	19.0837	0.000164198	0.00466095																ENSBTAG00000000638	-2.69817	3.57884	16.0692	0.000428918	0.0153496		ENSBTAG00000039509	-2.1938	1.59039	15.0247	0.000608856	0.0169172
ENSBTAG00000021427	-2.07933	2.60798	19.0574	0.000165528	0.00466538																ENSBTAG00000023648	6.95185	-2.06507	18.8573	0.000433964	0.0154951		ENSBTAG00000047491	2.58138	5.16773	14.9953	0.000614979	0.0170274
ENSBTAG00000025226	-2.52824	0.675824	18.9876	0.000169116	0.00470721																ENSBTAG00000009145	2.23147	1.40875	16.0048	0.000438169	0.015532		ENSBTAG00000035013	-3.28357	1.91831	14.9764	0.000618944	0.0171071
ENSBTAG00000008329	-5.18398	3.88816	18.8916	0.000174194	0.00478942																ENSBTAG00000016255	-2.58773	2.08373	15.9927	0.00043992	0.015532		ENSBTAG00000010109	-3.02264	4.04655	14.8864	0.000638222	0.0174822
ENSBTAG00000047531	-2.88079	0.85694	18.8747	0.000175104	0.00478942																ENSBTAG00000026986	3.82575	10.5606	15.9531	0.000445735	0.0156672		ENSBTAG00000046807	2.3151	1.05409	14.8834	0.000638883	0.0174822
ENSBTAG00000047155	-5.59728	3.18955	18.864	0.000175685	0.00479698																ENSBTAG00000046543	4.00997	-1.6927	15.9101	0.000452143	0.0157896		ENSBTAG00000009383	-2.99141	5.04017	14.8751	0.000640702	0.0174941
ENSBTAG00000031800	-2.2747	7.50469	18.8456	0.000176683	0.00479963																ENSBTAG00000009618	-3.5139	3.01237	15.8949	0.000454441	0.0158003		ENSBTAG00000011766	4.67862	2.86894	14.8645	0.000643009	0.0174967
ENSBTAG00000000589	-4.33963	3.41173	18.7333	0.000182924	0.00491534																ENSBTAG00000010384	-3.19239	3.03239	15.8492	0.000461387	0.0160035		ENSBTAG00000018300	3.29003	1.61807	14.8402	0.000648386	0.017522
ENSBTAG00000037921	-5.11631	0.155784	19.1779	0.000183987	0.00492984																ENSBTAG00000001343	-3.64701	3.10151	15.8026	0.000468613	0.0161832		ENSBTAG00000025136	4.02588	2.45484	14.8158	0.000653814	0.0175894
ENSBTAG00000004948	-5.5955	-1.51819	19.1511	0.000185454	0.0049542																ENSBTAG00000008676	2.44108	-0.934431	15.7971	0.000468785	0.0161832		ENSBTAG00000016667	2.60389	1.80264	14.8048	0.000656266	0.0176143
ENSBTAG00000017697	-2.05363	3.03883	18.6863	0.000185607	0.0049542																ENSBTAG00000009774	8.59587	-0.206522	17.0068	0.000476839	0.0162217		ENSBTAG00000007131	2.05776	0.926643	14.7325	0.000672724	0.0178736
ENSBTAG00000048075	-3.93562	3.15021	18.6765	0.000186171	0.0049542																ENSBTAG00000007090	4.1594	6.40816	15.7324	0.000479706	0.0162217		ENSBTAG00000007783	-2.25045	6.23383	14.7139	0.00067703	0.0179385
ENSBTAG00000033422	-4.948	3.73842	18.6018	0.000190534	0.00502843																ENSBTAG00000006951	3.23391	3.41341	15.7241	0.000481038	0.0162217		ENSBTAG00000033441	-3.18826	4.40998	14.7084	0.000678311	0.0179385
ENSBTAG00000009705	-3.83691	9.12295	18.5678	0.000192556	0.00504804																ENSBTAG00000000752	-2.64496	3.59497	15.6979	0.000485259	0.0162598		ENSBTAG00000021181	-2.611	4.3398	14.6757	0.000685951	0.0179385
ENSBTAG00000010138	-2.70121	4.04391	18.5006	0.000196626	0.00513464																ENSBTAG00000012653	3.9078	3.72685	15.6703	0.000489762	0.0163289		ENSBTAG00000009035	-3.08051	4.16656	14.6735	0.000686482	0.0179385
ENSBTAG00000014596	-3.94941	2.80215	18.4785	0.000197982	0.00514478																ENSBTAG00000006882	-3.13521	4.57565	15.643	0.000494255	0.0163873		ENSBTAG00000008501	3.87408	-0.905563	16.3361	0.000686532	0.0179385
ENSBTAG00000003802	-2.33575	-0.233725	18.4382	0.000199986	0.00517406																ENSBTAG00000047823	3.35933	-2.11238	16.8271	0.000500911	0.0165064		ENSBTAG00000025664	-3.27413	-0.110375	14.6654	0.000688394	0.0179434
ENSBTAG00000001032	-6.34208	5.42982	18.4193	0.000201668	0.00520903																ENSBTAG00000000987	3.0289	5.70876	15.5992	0.000501545	0.0165064		ENSBTAG00000003838	-2.57254	0.103586	14.6351	0.000695602	0.0180857
ENSBTAG00000018204	-7.49298	5.26335	18.8305	0.00020403	0.00524431																ENSBTAG00000009115	2.16234	2.05445	15.572	0.000506139	0.0165324		ENSBTAG00000002880	3.04577	3.36641	14.6118	0.000701188	0.0181822
ENSBTAG00000008763	-10.0916	5.25338	18.7063	0.000211765	0.00539043																ENSBTAG00000017409	-2.50599	1.36472	15.5661	0.000507147	0.0165324		ENSBTAG00000017060	3.10569	0.732597	14.598	0.000704518	0.0181822
ENSBTAG00000014069	2.03033	2.38329	18.2538	0.000212367	0.00539707																ENSBTAG00000020227	-3.06419	2.34935	15.5546	0.000509108	0.0165324		ENSBTAG00000046594	-3.02317	2.88573	14.577	0.000709632	0.0182401
ENSBTAG00000002952	-2.00933	0.413732	18.2336	0.000212716	0.00539724																ENSBTAG00000015595	-3.13244	5.56415	15.5139	0.000516103	0.0166903		ENSBTAG00000043530	-2.08676	0.546206	14.5536	0.000715379	0.0182984
ENSBTAG00000012307	-2.19215	5.66544	18.2089	0.000215377	0.0054465																ENSBTAG00000001500	-2.054	2.89747	15.5043	0.000517768	0.0166903		ENSBTAG00000019591	2.30623	0.128549	14.4993	0.000728885	0.0184899
ENSBTAG00000045954	-3.962	1.27849	18.1494	0.000219439	0.00547972																ENSBTAG00000001728	-2.02668	1.46613	15.5018	0.000518202	0.0166903		ENSBTAG00000017409	-2.40363	1.36472	14.4979	0.000729242	0.0184899
ENSBTAG00000004508	-4.16915	-0.123907	18.5786	0.000220043	0.00548614																ENSBTAG00000010640	-2.87374	3.07585	15.4674	0.000524224	0.0167614		ENSBTAG00000023938	-3.15889	4.88689	14.4953	0.000729895	0.0184899
ENSBTAG00000030932	-2.17564	1.96459	18.1041	0.000222582	0.00551458																ENSBTAG00000005607	-2.75975	3.81029	15.4561	0.00052622	0.0167614		ENSBTAG00000019818	3.02552	4.36224	14.4756	0.000734891	0.0185272
ENSBTAG00000016768	-5.05855	2.4175	18.0672	0.000225175	0.00554402																ENSBTAG00000016026	-2.26575	5.12704	15.4475	0.000527735	0.0167614		ENSBTAG00000036400	3.60443	-0.69933	14.7519	0.000738545	0.0185601
ENSBTAG00000039356	-8.91871	-0.240503	19.5577	0.000232979	0.00566544																ENSBTAG00000021346	-2.0114	4.00606	15.4404	0.000528994	0.0167642		ENSBTAG00000015228	2.27697	-0.909597	14.4443	0.000740975	0.018562
ENSBTAG00000002670	-3.53964	4.68	17.9172	0.000236079	0.00572318																ENSBTAG00000017133	-2.3657	3.77891	15.3736	0.000541025	0.0170769		ENSBTAG00000008216	-3.41022	7.04048	14.3917	0.00075649	0.018813
ENSBTAG00000011182	2.0513	3.97842	17.8053	0.000244576	0.005884																ENSBTAG00000002574	2.86811	7.16387	15.3245	0.000550067	0.0171709		ENSBTAG00000013918	2.34311	1.64749	14.3854	0.000758148	0.018813
ENSBTAG00000009153	-3.29883	3.25519	17.7802	0.000246532	0.00590346																ENSBTAG00000006591	-2.97544	3.7912	15.322	0.000550531	0.0171709		ENSBTAG00000005604	3.44087	1.75888	14.3425	0.000769498	0.0189753
ENSBTAG00000046420	-2.52274	-0.240416	17.7737	0.000246619	0.00590346																ENSBTAG00000001021	-5.11154	0.0236761	15.252	0.000563696	0.0173755		ENSBTAG00000007492	2.81192	1.62118	14.317	0.000776327	0.0190013
ENSBTAG00000027868	-2.52131	3.63108	17.7767	0.000246804	0.00590346																ENSBTAG00000005129	-3.15336	4.05939	15.1869	0.000576243	0.0175065		ENSBTAG00000016125	3.2893	0.318085	14.5969	0.000777778	0.0190013
ENSBTAG00000013764	-2.10316	0.882516	17.7757	0.000246882	0.00590346																ENSBTAG00000019585	2.829	6.35759	15.1748	0.000578608	0.017527		ENSBTAG00000022058	3.41391	1.61886	14.3072	0.000778977	0.0190013
ENSBTAG00000015290	-2.31959	-0.129168	17.7468	0.000248393	0.00592165																ENSBTAG00000048029	-5.28287	-0.621148	15.4832	0.000580282	0.0175441		ENSBTAG00000045010	2.53736	0.867619	14.2801	0.000786324	0.0190919
ENSBTAG00000008807	-3.80471	1.9349	17.7002	0.000252862	0.00599199																ENSBTAG00000038462	3.18162	4.99633	15.1553	0.000582449	0.0175759		ENSBTAG00000024115	2.2478	3.55199	14.2711	0.000788802	0.0190934
ENSBTAG00000011847	-2.89823	6.05283	17.674	0.000254972	0.00603294																ENSBTAG00000001120	2.03727	5.03086	15.1375	0.00058597	0.0176414		ENSBTAG00000013802	3.48516	1.94273	14.2498	0.000794638	0.0191465
ENSBTAG00000004215	-3.22932	3.79486	17.6646	0.000255741	0.00604206																ENSBTAG00000024449	-3.71166	6.05499	15.1143	0.000590601	0.0176986		ENSBTAG00000046766	-2.44753	1.49678	14.2362	0.000798404	0.0192079
ENSBTAG00000021420	-2.63738	-0.254414	17.6482	0.000256698	0.00605479																ENSBTAG00000007444	2.76877	5.22814	15.105	0.000592459	0.0177087		ENSBTAG00000018765	2.96022	0.765093	14.207	0.000806568	0.0193382
ENSBTAG00000021132	-3.746	6.25307	17.5512	0.000265132	0.00617547																ENSBTAG00000021993	2.43637	-0.531358	15.0485	0.000603946	0.0179501		ENSBTAG00000047538	3.74475	0.287483	14.2055	0.000806962	0.0193382
ENSBTAG00000018167	-3.50853	4.70523	17.5492	0.0002653	0.00617547																ENSBTAG00000023806	2.95545	5.60202	15.0346	0.000606809	0.0179675		ENSBTAG00000021708	-2.35846	4.57795	14.1617	0.000819359	0.0194564
ENSBTAG00000020701	-4.05963	6.47119	17.5311	0.000266839	0.00620215																ENSBTAG00000017032	3.28943	1.72325	15.0113	0.000611629	0.0180425		ENSBTAG00000017446	-3.31905	4.01994	14.1532	0.000821808	0.0194741
ENSBTAG00000036367	-2.06383	1.98217	17.514	0.000268295	0.00621286																ENSBTAG00000030885	2.09487	3.15588	14.9872	0.000616667	0.0181572		ENSBTAG00000043462	-2.28258	0.317223	14.1443	0.000824363	0.0195054
ENSBTAG00000010741	-2.90787	9.422	17.5109	0.000268563	0.00621286																ENSBTAG00000030444	4.3209	-1.59172	15.2866	0.000618856	0.0181789		ENSBTAG00000015470	3.04242	6.16924	14.1247	0.000830011	0.0195803
ENSBTAG00000013124	-4.73822	2.21162	17.4973	0.000269729	0.00621424																ENSBTAG00000002849	2.64025	-0.664516	14.9329	0.000628188	0.0182549		ENSBTAG00000035844	2.51933	-0.454002	14.0568	0.000849885	0.0198122
ENSBTAG00000031673	-3.18248	-0.677331	17.4587	0.000273073	0.00626401																ENSBTAG00000012889	-3.88196	2.06677	14.928	0.000629239	0.0182549		ENSBTAG00000025337	3.32384	4.24465	14.0361	0.000856052	0.019868
ENSBTAG00000002644	-4.18848	7.01501	17.4482	0.000273986	0.00627584																ENSBTAG00000007860	-3.42297	5.93237	14.8972	0.000635889	0.0183802		ENSBTAG00000021993	2.35035	-0.531358	14.0158	0.000862165	0.0199622
ENSBTAG00000003276	-2.24822	2.02297	17.4237	0.000276139	0.00629773																ENSBTAG00000010721	-2.31695	6.00503	14.8868	0.000638133	0.0184114		ENSBTAG00000014391	2.60129	-1.27441	14.0065	0.000863906	0.0199622
ENSBTAG00000020573	-3.26453	5.37222	17.3892	0.000279205	0.00635625																ENSBTAG00000018775	-2.16608	6.27605	14.8141	0.00065419	0.0187376		ENSBTAG00000000281	-2.01171	2.35244	13.9882	0.000870528	0.0200564
ENSBTAG00000000601	-3.76073	-1.18673	17.281	0.000288274	0.00648981																ENSBTAG00000018358	2.60551	6.11834	14.7967	0.000658107	0.0187816		ENSBTAG00000005850	2.04158	2.00334	13.9462	0.000883431	0.0202356
ENSBTAG00000003019	-4.59955	-0.140679	17.2672	0.000290329	0.00651774																ENSBTAG00000009155	3.68568	3.98778	14.7726	0.000663542	0.0188685		ENSBTAG00000020649	2.99517	0.313996	13.9089	0.000895058	0.020413
ENSBTAG00000018358	-2.93389	6.11834	17.2487	0.000292061	0.0065373																ENSBTAG00000010741	2.63022	9.422	14.7276	0.000673846	0.0190244		ENSBTAG00000000434	2.20398	9.35239	13.8795	0.000904323	0.020485
ENSBTAG00000030922	2.65432	-1.23882	17.2334	0.000292857	0.0065373																ENSBTAG00000000044	3.99382	1.20676	14.9982	0.000680553	0.0191453		ENSBTAG00000011416	-2.23314	3.446	13.8549	0.000912164	0.0205068
ENSBTAG00000031573	-4.4142	3.63192	17.2092	0.000295791	0.00654085																ENSBTAG00000014773	-2.27777	4.21284	14.6871	0.00068329	0.0191469		ENSBTAG00000007324	5.05336	-2.15658	14.7835	0.000930451	0.0206823
ENSBTAG00000034885	-3.04073	3.98901	17.2081	0.000295891	0.00654085																ENSBTAG00000008111	-3.23475	-0.209634	14.6736	0.000686446	0.0191469		ENSBTAG00000015654	3.95688	-0.0286354	13.7933	0.00093215	0.0206823
ENSBTAG00000005288	-3.28086	6.74258	17.1876	0.000297844	0.00654085																ENSBTAG00000000841	2.00569	4.66497	14.6727	0.000686677	0.0191469		ENSBTAG00000004488	3.09302	4.15986	13.7844	0.000935055	0.0206971
ENSBTAG00000037902	-2.31919	1.44244	17.1875	0.000297858	0.00654085																ENSBTAG00000010774	-2.11161	4.37689	14.6278	0.000697351	0.019342		ENSBTAG00000016042	-2.16863	0.400087	13.7527	0.000945552	0.0209001
ENSBTAG00000005714	-2.64678	11.1095	17.168	0.000299734	0.00655181																ENSBTAG00000002613	-2.4385	4.39308	14.6202	0.000699167	0.0193583		ENSBTAG00000023832	-2.84479	3.60286	13.7381	0.000950441	0.0209286
ENSBTAG00000010343	-5.4087	-0.413306	17.1259	0.000303816	0.00656825																ENSBTAG00000016801	2.60488	2.08736	14.6131	0.000700876	0.0193717		ENSBTAG00000019241	2.2125	5.18857	13.7299	0.000953173	0.0209512
ENSBTAG00000000809	-3.57805	0.446328	17.1107	0.000305313	0.00658582																ENSBTAG00000017026	-3.27358	2.79694	14.5859	0.000707474	0.0194858		ENSBTAG00000014602	2.089	1.04791	13.7087	0.000960327	0.0209915
ENSBTAG00000019792	-3.43196	1.1017	17.0803	0.00030832	0.00662029																ENSBTAG00000010766	-2.29661	3.29274	14.5676	0.000711927	0.0195402		ENSBTAG00000010640	-2.67393	3.07585	13.7027	0.00096237	0.0210071
ENSBTAG00000027766	-3.09555	5.74854	17.0691	0.000309429	0.00662867																ENSBTAG00000000238	2.64926	3.26207	14.5253	0.000722387	0.0197586		ENSBTAG00000009455	2.12908	0.757435	13.6957	0.000964728	0.0210295
ENSBTAG00000012252	-2.95082	3.15399	17.0679	0.000309551	0.00662867																ENSBTAG00000046365	4.74632	-1.19479	14.4977	0.000729291	0.0198785		ENSBTAG00000040065	-2.66842	2.8145	13.6252	0.000989048	0.0212214
ENSBTAG00000016514	-2.04012	6.64725	17.0193	0.000314441	0.00670608																ENSBTAG00000007319	2.26774	2.47719	14.4742	0.000735242	0.0199375		ENSBTAG00000044175	-2.80207	3.13987	13.6079	0.000995118	0.0212214
ENSBTAG00000033221	-2.44327	6.83506	16.963	0.000320219	0.00679298																ENSBTAG00000008180	-2.84111	4.25973	14.4588	0.000739152	0.0200091		ENSBTAG00000001324	-2.91196	0.724409	13.597	0.000998964	0.0212214
ENSBTAG00000009703	-7.91107	5.55371	16.9614	0.000320375	0.00679298																ENSBTAG00000040208	-5.42339	-1.98529	14.7148	0.000747137	0.0201756		ENSBTAG00000021588	-3.73633	0.048542	13.5967	0.000999083	0.0212214
ENSBTAG00000010562	-3.47114	2.71906	16.8455	0.000332634	0.00700154																ENSBTAG00000008763	4.4555	5.25338	14.7057	0.000750003	0.0201756		ENSBTAG00000032372	-2.2674	3.7262	13.5648	0.00101044	0.0213526
ENSBTAG00000019368	-2.94143	7.4207	16.8446	0.000332731	0.00700154																ENSBTAG00000040065	-2.76642	2.8145	14.415	0.000750417	0.0201756		ENSBTAG00000002931	3.51834	4.53457	13.5001	0.00103387	0.0215185
ENSBTAG00000015829	-2.09789	2.0931	16.7788	0.000339912	0.00713859																ENSBTAG00000006762	2.80583	-0.560824	14.3157	0.000776681	0.0206704		ENSBTAG00000027868	2.06636	3.63108	13.4935	0.00103627	0.0215185
ENSBTAG00000019294	-3.55876	4.93377	16.7766	0.000340148	0.00713859																ENSBTAG00000006835	2.48137	4.29712	14.2688	0.000789407	0.0209385		ENSBTAG00000010179	2.64353	5.87727	13.4887	0.00103806	0.0215185
ENSBTAG00000020342	-2.18901	5.1661	16.7645	0.000341497	0.00714279																ENSBTAG00000024492	3.4101	-1.51932	14.5322	0.000794816	0.0210114		ENSBTAG00000015926	2.85712	6.33474	13.4884	0.00103817	0.0215185
ENSBTAG00000039967	3.5884	-1.39824	16.7314	0.000345184	0.00718694																ENSBTAG00000018519	3.42768	3.02115	14.2432	0.000796458	0.0210196		ENSBTAG00000004895	2.58659	4.57518	13.4872	0.00103862	0.0215185
ENSBTAG00000012630	-3.88968	2.28845	16.7102	0.000347576	0.00721703																ENSBTAG00000004411	-3.82428	1.63002	14.2364	0.000798358	0.0210345		ENSBTAG00000013492	3.53864	4.37906	13.4825	0.00104034	0.0215185
ENSBTAG00000010667	-2.3186	4.3712	16.6296	0.00035682	0.00733611																ENSBTAG00000011636	-2.14913	3.73597	14.2126	0.000804994	0.0210766		ENSBTAG00000015875	-2.86456	3.44476	13.4684	0.00104557	0.0215701
ENSBTAG00000025140	-2.12717	1.35684	16.6281	0.000356998	0.00733611																ENSBTAG00000013492	3.64943	4.37906	14.2115	0.000805298	0.0210766		ENSBTAG00000019378	5.57722	1.79969	13.3964	0.00107265	0.0219614
ENSBTAG00000039119	-3.19518	-0.392062	16.6178	0.000358193	0.00734567																ENSBTAG00000011459	2.12855	-0.42547	14.2022	0.000807174	0.0210908		ENSBTAG00000009618	-3.14159	3.01237	13.3958	0.00107288	0.0219614
ENSBTAG00000034883	-3.52409	-1.14981	16.5964	0.000360703	0.00737385																ENSBTAG00000015059	-5.41834	2.65073	14.1888	0.000811677	0.0211418		ENSBTAG00000002574	2.65547	7.16387	13.3645	0.0010849	0.0220942
ENSBTAG00000018513	-2.21538	8.86571	16.4744	0.000375377	0.00761464																ENSBTAG00000006999	3.35326	7.62222	14.1785	0.00081459	0.0211793		ENSBTAG00000020194	2.03797	2.78316	13.3628	0.00108557	0.0220942
ENSBTAG00000007531	-4.60018	1.72972	16.465	0.000376532	0.00761632																ENSBTAG00000032007	-2.45827	4.81406	14.1681	0.00081754	0.0211862		ENSBTAG00000004860	3.27334	-0.29614	13.3286	0.00109887	0.0221706
ENSBTAG00000007353	-3.09001	-0.219088	16.462	0.000376907	0.00761632																ENSBTAG00000015374	3.94452	-1.5933	14.0991	0.000837452	0.0214194		ENSBTAG00000020954	2.83695	0.511501	13.3092	0.00110653	0.0222178
ENSBTAG00000007193	-5.6769	-0.802567	16.8064	0.000379673	0.00764089																ENSBTAG00000032774	-2.26392	2.59327	14.0912	0.000839739	0.0214194		ENSBTAG00000020105	4.00179	1.59419	13.4971	0.00113053	0.0224013
ENSBTAG00000044027	-3.008	3.46631	16.4264	0.000381322	0.00764679																ENSBTAG00000021162	-2.3276	6.79847	14.088	0.000840704	0.0214194		ENSBTAG00000010276	-2.21794	3.34853	13.1873	0.00115576	0.0226868
ENSBTAG00000001444	-3.33717	6.37279	16.4071	0.00038375	0.00768571																ENSBTAG00000017040	-2.20182	3.37424	14.0715	0.000845538	0.0214194		ENSBTAG00000013662	2.39449	6.79284	13.1777	0.00115976	0.0226883
ENSBTAG00000013923	-2.69689	3.53575	16.3632	0.00038931	0.00772493																ENSBTAG00000021673	-2.99902	4.34161	14.0638	0.000847832	0.0214204		ENSBTAG00000019801	2.87155	3.06408	13.1599	0.00116719	0.0227416
ENSBTAG00000011076	-2.73666	1.81657	16.3603	0.000389691	0.00772493																ENSBTAG00000014435	-2.60091	3.93879	14.0616	0.000848487	0.0214204		ENSBTAG00000009513	-3.04382	4.94013	13.1539	0.00116968	0.0227618
ENSBTAG00000026344	-3.41578	1.30849	16.3566	0.000390165	0.00772493																ENSBTAG00000007344	-2.04255	1.45114	13.9802	0.000872963	0.0218338		ENSBTAG00000000638	-2.40068	3.57884	13.1497	0.00117146	0.0227684
ENSBTAG00000009047	-2.00812	5.39376	16.3508	0.000390909	0.00772493																ENSBTAG00000022580	2.20812	3.94752	13.9124	0.000893944	0.0221699		ENSBTAG00000006999	3.20492	7.62222	13.1219	0.0011832	0.022912
ENSBTAG00000006823	-2.53952	5.98082	16.3393	0.000392378	0.00772493																ENSBTAG00000003403	2.99917	1.39057	13.9096	0.00089483	0.0221699		ENSBTAG00000003692	-2.21804	5.1851	13.0814	0.00120048	0.0230809
ENSBTAG00000011036	-4.7865	3.79169	16.2946	0.000398193	0.00781627																ENSBTAG00000001344	3.23402	0.429528	13.8282	0.000920765	0.0227055		ENSBTAG00000014540	2.99691	0.262332	13.0523	0.00121313	0.0231619
ENSBTAG00000021588	-4.10972	0.048542	16.2606	0.000402669	0.00787474																ENSBTAG00000046696	-3.99516	0.379568	13.7653	0.000941356	0.0231409		ENSBTAG00000046365	4.5258	-1.19479	13.0364	0.00122007	0.023227
ENSBTAG00000024647	-2.77984	3.99834	16.2278	0.000407039	0.00794099																ENSBTAG00000002019	-6.60557	-1.54933	13.9948	0.000953083	0.0232841		ENSBTAG00000013732	4.72759	-2.01733	13.028	0.00122374	0.0232408
ENSBTAG00000009257	-2.95776	3.07934	16.2127	0.000409075	0.00794099																ENSBTAG00000001604	3.85202	3.44467	13.723	0.000955496	0.023307		ENSBTAG00000006551	-3.0943	3.8634	13.0193	0.00122759	0.0232859
ENSBTAG00000015387	-2.22736	2.72953	16.2046	0.000410172	0.00794273																ENSBTAG00000011416	-2.2197	3.446	13.6917	0.000966112	0.0234233		ENSBTAG00000026986	3.3856	10.5606	13.0089	0.00123218	0.0233449
ENSBTAG00000014177	-3.16318	2.77497	16.1789	0.000413649	0.00796128																ENSBTAG00000047118	3.09108	3.33321	13.6914	0.000966198	0.0234233		ENSBTAG00000009702	3.99839	8.68963	13.0002	0.00123608	0.0233568
ENSBTAG00000022819	3.11439	-0.826248	16.1423	0.000418684	0.00803852																ENSBTAG00000016413	2.27954	4.605	13.6464	0.000981697	0.023553		ENSBTAG00000026971	-2.63376	4.03092	12.9478	0.00125961	0.0235406
ENSBTAG00000018519	-4.88129	3.02115	16.0848	0.000426715	0.00811375																ENSBTAG00000011300	3.38539	-1.7649	13.8951	0.000986052	0.023553		ENSBTAG00000033748	-7.43212	-0.82179	13.4508	0.00126874	0.0235406
ENSBTAG00000022244	-3.28889	7.52411	16.0665	0.000429297	0.00813345																ENSBTAG00000006972	-2.07182	3.87333	13.6326	0.000986473	0.023553		ENSBTAG00000006552	3.44521	-1.91634	13.1611	0.00126959	0.0235406
ENSBTAG00000015129	-4.97344	-0.60071	16.0612	0.000430054	0.00813802																ENSBTAG00000002882	-2.44077	6.18194	13.6206	0.000990673	0.0236114		ENSBTAG00000009774	7.92475	-0.206522	13.798	0.00127018	0.0235406
ENSBTAG00000013155	2.195	-1.15468	16.0424	0.000430817	0.0081427																ENSBTAG00000015470	2.97966	6.16924	13.6171	0.000991912	0.0236114		ENSBTAG00000006424	2.69879	-1.05784	12.9238	0.00127056	0.0235406
ENSBTAG00000023600	-4.69426	6.22363	16.0408	0.000432968	0.00815405																ENSBTAG00000047003	2.46956	-0.10848	13.5973	0.00099886	0.0236765		ENSBTAG00000021162	-2.21882	6.79847	12.9173	0.00127355	0.023563
ENSBTAG00000014525	-5.56424	4.72274	15.9918	0.000440052	0.00826773																ENSBTAG00000031265	2.04508	-0.342806	13.5371	0.00101938	0.0239403		ENSBTAG00000005607	-2.48249	3.81029	12.9118	0.00127609	0.0235822
ENSBTAG00000011869	-5.99074	4.18461	15.8653	0.000458936	0.00854027																ENSBTAG00000005895	-3.27676	1.51217	13.514	0.00102877	0.0240534		ENSBTAG00000013569	-3.06427	-1.17175	12.8999	0.00128158	0.0236522
ENSBTAG00000000053	-3.8533	4.81055	15.8445	0.000462122	0.00854948																ENSBTAG00000017021	-2.30614	5.01396	13.4297	0.00106004	0.0243504		ENSBTAG00000020087	2.9335	0.791666	12.8624	0.00129905	0.0238391
ENSBTAG00000019347	-5.54317	2.48795	15.8411	0.000462632	0.00854948																ENSBTAG00000012285	3.30201	-0.0131011	13.4257	0.00106153	0.0243504		ENSBTAG00000011044	-2.07666	5.39833	12.8583	0.00130095	0.0238438
ENSBTAG00000006561	-2.28037	1.50231	15.7813	0.000471951	0.00863131																ENSBTAG00000009182	3.86666	-1.275	13.3491	0.00109089	0.0247793		ENSBTAG00000037885	6.32077	-2.40584	13.7202	0.00130233	0.0238438
ENSBTAG00000017701	-2.15667	2.18015	15.7804	0.00047208	0.00863131																ENSBTAG00000021681	-3.39279	2.59815	13.3121	0.00110536	0.0250285		ENSBTAG00000007148	2.26512	1.24271	12.8294	0.00131465	0.0239858
ENSBTAG00000011082	-4.55461	0.762357	15.6925	0.000486141	0.00877165																ENSBTAG00000014602	2.05679	1.04791	13.2997	0.00111028	0.0251037		ENSBTAG00000000792	-4.2569	-1.06652	12.814	0.00132196	0.0240182
ENSBTAG00000008291	-2.52779	5.30316	15.6231	0.000497547	0.00893321																ENSBTAG00000009752	3.03453	1.66416	13.2861	0.00111567	0.0251536		ENSBTAG00000023806	2.70066	5.60202	12.8055	0.00132603	0.0240269
ENSBTAG00000001604	-6.80726	3.44467	15.6136	0.000499136	0.00895156																ENSBTAG00000014391	2.53804	-1.27441	13.2132	0.00114384	0.0255334		ENSBTAG00000018493	-2.19977	3.68891	12.768	0.0013442	0.0241876
ENSBTAG00000009725	-3.79773	5.22706	15.5189	0.000515236	0.00916629																ENSBTAG00000043462	-2.17877	0.317223	13.0809	0.00120074	0.026264		ENSBTAG00000021730	4.84807	-0.988624	13.2761	0.00134563	0.0241876
ENSBTAG00000009768	-2.54191	3.14378	15.514	0.000516089	0.00916629																ENSBTAG00000019496	-2.23615	3.49537	13.0631	0.00120844	0.0262641		ENSBTAG00000036363	4.30335	-1.2037	13.2384	0.00136287	0.0242385
ENSBTAG00000007444	-2.91411	5.22814	15.4955	0.000519304	0.00916629																ENSBTAG00000002701	2.22359	-1.24093	13.0554	0.0012085	0.0262641		ENSBTAG00000018703	4.48621	-0.836361	13.5761	0.00136423	0.0242385
ENSBTAG00000047894	-5.10112	0.0918519	15.4858	0.000520983	0.00916629																ENSBTAG00000001324	-2.84535	0.724409	13.0542	0.00121229	0.0262807		ENSBTAG00000007196	-2.14517	9.82335	12.6735	0.00139109	0.0243936
ENSBTAG00000047988	-2.5785	1.96603	15.4148	0.000533573	0.0092812																ENSBTAG00000026242	-2.11967	1.63259	13.0159	0.00122908	0.0264629		ENSBTAG00000001631	-2.12198	5.50575	12.6424	0.00140692	0.0245035
ENSBTAG00000016413	-2.54687	4.605	15.3993	0.000536361	0.00931227																ENSBTAG00000009786	-2.64819	2.6862	13.0011	0.00123567	0.0265385		ENSBTAG00000046325	-2.12566	4.4008	12.6404	0.00140794	0.0245035
ENSBTAG00000003705	-2.25819	0.841538	15.3721	0.000541299	0.00937644																ENSBTAG00000022158	3.52191	7.97655	12.9288	0.00126827	0.0269392		ENSBTAG00000022158	3.47486	7.97655	12.6391	0.00140857	0.0245035
ENSBTAG00000019726	-4.39933	-0.828723	15.3588	0.000543728	0.00938853																ENSBTAG00000011672	3.00293	-0.689657	12.8896	0.00128633	0.0271535		ENSBTAG00000012888	2.85705	0.989442	12.5741	0.0014423	0.0248628
ENSBTAG00000007850	-2.053	0.155822	15.3496	0.000544413	0.00939009																ENSBTAG00000018253	2.10704	7.92349	12.8864	0.00128783	0.0271535		ENSBTAG00000047484	3.06386	-1.10981	12.5537	0.00145307	0.0248628
ENSBTAG00000012700	-2.30673	4.04553	15.3077	0.000553181	0.00949979																ENSBTAG00000012097	2.14955	-0.0458248	12.8846	0.00128868	0.0271535		ENSBTAG00000001406	3.57836	-1.64658	12.546	0.00145716	0.0248628
ENSBTAG00000006234	-2.70563	0.231017	15.2587	0.000562428	0.0095915																ENSBTAG00000002444	-3.74512	8.19152	12.8791	0.00129123	0.0271709		ENSBTAG00000009704	2.07982	2.61599	12.5422	0.00145918	0.0248628
ENSBTAG00000004720	-3.02297	5.62678	15.2188	0.000570056	0.0096842																ENSBTAG00000002931	3.42147	4.53457	12.867	0.00129687	0.0271809		ENSBTAG00000019371	2.93248	-1.91869	12.5196	0.00146669	0.0248628
ENSBTAG00000019602	-2.73933	-0.341773	15.0256	0.000608659	0.0101418																ENSBTAG00000012888	2.89254	0.989442	12.8528	0.00130356	0.0272487		ENSBTAG00000031696	2.00527	3.83536	12.5259	0.0014679	0.0248628
ENSBTAG00000013176	-3.1271	2.98106	15.0192	0.000609993	0.0101443																ENSBTAG00000003314	-2.1558	4.36077	12.6973	0.00137911	0.0283753		ENSBTAG00000033292	-4.32453	-0.0546801	12.501	0.0014813	0.0250031
ENSBTAG00000046725	-3.42074	8.15507	14.9744	0.000619359	0.0102246																ENSBTAG00000018399	-2.03428	3.95689	12.6801	0.00138775	0.0284298		ENSBTAG00000005456	-2.81717	3.95957	12.4832	0.00149097	0.0250685
ENSBTAG00000007732	-3.22871	6.24144	14.9666	0.000621017	0.0102413																ENSBTAG00000008428	-2.96567	1.12251	12.6366	0.00140986	0.0287473		ENSBTAG00000001604	3.64404	3.44467	12.4822	0.00149153	0.0250685
ENSBTAG00000046177	-2.75619	4.14194	14.8331	0.000649947	0.0106075																ENSBTAG00000013183	2.74069	2.64214	12.6219	0.00141741	0.0288639		ENSBTAG00000029931	2.09838	-0.835015	12.4658	0.00149966	0.0250946
ENSBTAG00000006784	-2.02402	2.68938	14.7564	0.000667247	0.0108005																ENSBTAG00000023797	-7.23986	-0.323698	12.8294	0.00142726	0.0289741		ENSBTAG00000011672	2.94948	-0.689657	12.4469	0.00151088	0.0251565
ENSBTAG00000019818	-3.44955	4.36224	14.6899	0.000682631	0.0109742																ENSBTAG00000027425	2.90028	-1.04085	12.8156	0.00143422	0.0290191		ENSBTAG00000009430	2.73711	-1.48185	12.4465	0.00151111	0.0251565
ENSBTAG00000008592	-2.74296	1.76009	14.6874	0.000683215	0.0109742																ENSBTAG00000011548	3.28154	5.9469	12.5663	0.00144645	0.0291544		ENSBTAG00000007698	-2.12892	2.7539	12.4267	0.00152212	0.0252068
ENSBTAG00000002724	-2.19838	-0.875255	14.6691	0.000684823	0.0109836																ENSBTAG00000037786	2.01691	0.6751	12.5297	0.00146584	0.0293909		ENSBTAG00000011730	3.19657	5.61111	12.4131	0.0015297	0.0252349
ENSBTAG00000004824	-3.09573	6.60254	14.6687	0.000687614	0.0109949																ENSBTAG00000048067	-2.05926	-0.582733	12.4959	0.00147993	0.0295131		ENSBTAG00000011981	-2.76623	2.81644	12.3869	0.00154443	0.0254163
ENSBTAG00000017814	-2.12023	-0.41307	14.6204	0.000696398	0.0110904																ENSBTAG00000046396	-3.04068	1.26571	12.4836	0.00149075	0.0295545		ENSBTAG00000001021	-4.26334	0.0236761	12.3824	0.00154699	0.0254318
ENSBTAG00000008394	-8.03035	3.89118	14.6169	0.000699961	0.0111321																ENSBTAG00000046601	-3.04432	2.12609	12.4804	0.00149252	0.0295545		ENSBTAG00000019521	3.8269	0.913449	13.1682	0.00155786	0.0255307
ENSBTAG00000008313	-2.38453	4.17051	14.613	0.000700906	0.0111321																ENSBTAG00000006520	3.67317	-0.678824	12.4646	0.00150113	0.0296703		ENSBTAG00000013125	-2.08423	5.99491	12.315	0.00158575	0.0258722
ENSBTAG00000012390	2.58614	-1.50652	14.5173	0.000723373	0.0113257																ENSBTAG00000002644	3.27032	7.01501	12.4255	0.00152275	0.0298144		ENSBTAG00000013100	-2.77677	4.98018	12.2979	0.00159571	0.0259535
ENSBTAG00000021657	-6.74624	1.2319	15.1392	0.000730058	0.0113627																ENSBTAG00000005010	-2.26244	2.89162	12.38	0.00154838	0.0299467		ENSBTAG00000003458	-2.41022	4.18424	12.2942	0.00159791	0.0259535
ENSBTAG00000010303	-2.42383	3.82571	14.483	0.000732995	0.0113853																ENSBTAG00000036400	3.32495	-0.69933	12.5577	0.00157142	0.0301704		ENSBTAG00000035018	3.06435	0.128828	12.2915	0.00159948	0.0259535
ENSBTAG00000046324	-3.77049	4.14932	14.429	0.000746795	0.0115012																ENSBTAG00000010927	2.98781	4.33352	12.2997	0.00159465	0.0303947		ENSBTAG00000012025	2.27323	-1.09824	12.274	0.00160845	0.0259609
ENSBTAG00000016948	-4.44902	4.13396	14.4233	0.000748273	0.01151																ENSBTAG00000021713	2.04667	1.86766	12.2693	0.00161258	0.0305518		ENSBTAG00000038462	2.82357	4.99633	12.274	0.00160984	0.0259609
ENSBTAG00000013492	-4.55838	4.37906	14.3968	0.000755175	0.011571																ENSBTAG00000004085	-2.33754	4.11627	12.2172	0.00164382	0.0309676		ENSBTAG00000005236	4.90437	-1.90871	12.997	0.00164797	0.0263093
ENSBTAG00000018170	-7.66089	1.86534	14.5452	0.000791375	0.0119976																ENSBTAG00000015467	2.12553	5.1249	12.2005	0.00165394	0.0310006		ENSBTAG00000024726	-2.89199	4.69964	12.1925	0.00165884	0.026376
ENSBTAG00000001324	-2.93993	0.724409	14.1778	0.000814801	0.0122937																ENSBTAG00000013442	2.05608	-0.816441	12.1487	0.00168352	0.0314521		ENSBTAG00000010024	2.12779	-1.3358	12.186	0.00165957	0.026376
ENSBTAG00000006572	-3.27795	0.323774	14.1396	0.000825701	0.0123519																ENSBTAG00000018643	-2.16254	5.32168	12.1043	0.00171371	0.0317066		ENSBTAG00000038275	-3.29985	0.58356	12.1441	0.0016887	0.026594
ENSBTAG00000002894	-3.20881	0.237681	14.0863	0.000841191	0.0125124																ENSBTAG00000037986	2.00212	-0.266336	12.0633	0.00173824	0.0319358		ENSBTAG00000008180	-2.56515	4.25973	12.1418	0.00169014	0.026594
ENSBTAG00000010345	-5.5128	1.97693	14.0696	0.000846109	0.0125501																ENSBTAG00000009704	2.03781	2.61599	12.0591	0.00174264	0.0319424		ENSBTAG00000014969	2.67459	-0.53481	12.1367	0.00169338	0.0266159
ENSBTAG00000006630	-2.33793	0.0985005	14.0569	0.00084919	0.0125744																ENSBTAG00000006037	-3.12076	3.95783	12.0339	0.00175899	0.0321217		ENSBTAG00000013347	2.01843	7.72633	12.1213	0.00170302	0.0267168
ENSBTAG00000005958	-2.835	2.12504	14.0367	0.000855886	0.0126281																ENSBTAG00000021272	3.01626	3.64596	12.0203	0.00176784	0.0321529		ENSBTAG00000007860	-3.01896	5.93237	12.1008	0.00171599	0.0268071
ENSBTAG00000012297	-2.53034	2.51371	14.0213	0.000860514	0.0126449																ENSBTAG00000023832	-2.63423	3.60286	12.0195	0.00176839	0.0321529		ENSBTAG00000014773	-2.03575	4.21284	12.0017	0.00178009	0.0272308
ENSBTAG00000007654	-2.61807	1.77399	13.9158	0.00089287	0.0128805																ENSBTAG00000019818	2.71797	4.36224	11.9398	0.00182146	0.0327445		ENSBTAG00000038361	-5.15461	0.461637	12.2064	0.0017817	0.0272308
ENSBTAG00000000925	-2.50332	4.02299	13.9032	0.00089685	0.0129143																ENSBTAG00000046900	2.05371	-0.349358	11.9347	0.00182375	0.0327445		ENSBTAG00000018137	3.91962	4.43216	11.9954	0.00178426	0.0272308
ENSBTAG00000046263	-2.42379	1.75832	13.8874	0.000901832	0.0129517																ENSBTAG00000007732	2.74009	6.24144	11.9326	0.00182636	0.032754		ENSBTAG00000017280	2.88884	4.54395	11.9904	0.00178755	0.0272308
ENSBTAG00000014705	-6.03407	-0.171452	14.4809	0.000902577	0.0129517																ENSBTAG00000010188	4.37403	-0.233003	12.3739	0.00183301	0.0328246		ENSBTAG00000021713	2.02004	1.86766	11.9768	0.00179663	0.0272783
ENSBTAG00000048173	-3.06315	1.04312	13.8452	0.000915276	0.0130253																ENSBTAG00000004824	2.6954	6.60254	11.9115	0.00184069	0.0328246		ENSBTAG00000021193	-2.53095	3.12664	11.9189	0.00183567	0.0276173
ENSBTAG00000005353	-2.84098	10.7791	13.7949	0.000931594	0.0131945																ENSBTAG00000018167	2.56204	4.70523	11.8965	0.00185099	0.0329207		ENSBTAG00000020003	-3.25255	-0.0657873	11.9087	0.00184265	0.0276959
ENSBTAG00000003944	-2.64426	-0.0890067	13.7784	0.000937041	0.0132275																ENSBTAG00000017844	-2.20709	3.1554	11.8829	0.00186037	0.0329364		ENSBTAG00000019041	2.37446	-0.703969	11.8985	0.00184963	0.0277215
ENSBTAG00000043953	-4.24593	0.732221	13.7291	0.000953455	0.0134112																ENSBTAG00000021735	-2.35955	-0.190219	11.8812	0.00186157	0.0329364		ENSBTAG00000002117	-2.0522	2.59855	11.8922	0.00185398	0.0277605
ENSBTAG00000004019	-3.26784	3.78565	13.7066	0.000961035	0.013466																ENSBTAG00000000792	-4.01415	-1.06652	11.8414	0.00188937	0.0332077		ENSBTAG00000001343	-3.04466	3.10151	11.8867	0.00185779	0.0277911
ENSBTAG00000015510	-2.89899	0.863628	13.6992	0.000963553	0.0134693																ENSBTAG00000000434	2.01714	9.35239	11.7797	0.00193335	0.0334838		ENSBTAG00000018167	2.55684	4.70523	11.8557	0.00187932	0.0279815
ENSBTAG00000010992	-2.23439	7.66608	13.6804	0.000969978	0.0134993																ENSBTAG00000040098	-2.16697	0.157467	11.7762	0.00193586	0.0334838		ENSBTAG00000010952	2.47948	-0.715439	11.8556	0.00187938	0.0279815
ENSBTAG00000047466	-3.18227	0.303667	13.6649	0.000975293	0.0135374																ENSBTAG00000037778	-2.93879	1.42828	11.7673	0.00194233	0.0335382		ENSBTAG00000020489	2.29265	2.26025	11.8503	0.00188309	0.0279991
ENSBTAG00000014916	-2.24821	1.16228	13.6394	0.000984112	0.0135898																ENSBTAG00000038361	-5.11907	0.461637	11.9563	0.00195002	0.0336012		ENSBTAG00000047118	2.84994	3.33321	11.8434	0.00188794	0.0279991
ENSBTAG00000010123	-2.05136	5.33881	13.6369	0.00098498	0.0135898																ENSBTAG00000015818	-4.98749	0.0663868	11.7316	0.00196836	0.0338027		ENSBTAG00000001851	5.09243	0.943086	12.0436	0.00188943	0.0279991
ENSBTAG00000010677	-2.10261	5.72225	13.6174	0.000991812	0.0135918																ENSBTAG00000009917	2.24728	2.09597	11.6987	0.00199281	0.0341016		ENSBTAG00000015419	2.28469	-1.41958	11.8163	0.00190468	0.0281059
ENSBTAG00000005234	-2.52002	1.73737	13.6165	0.000992127	0.0135918																ENSBTAG00000019241	2.02976	5.18857	11.6846	0.0020033	0.0341177		ENSBTAG00000002224	-2.35699	5.60656	11.7995	0.00191915	0.0282042
ENSBTAG00000005450	-3.75613	-0.955072	13.5732	0.00100743	0.0137299																ENSBTAG00000014540	2.82947	0.262332	11.6819	0.00200536	0.0341177		ENSBTAG00000045889	2.63786	3.8715	11.7686	0.00194139	0.0282909
ENSBTAG00000047036	-2.36031	-0.709251	13.5337	0.00102142	0.0138565																ENSBTAG00000007638	-2.25828	1.13327	11.6413	0.00203607	0.0345519		ENSBTAG00000023784	2.59705	2.15269	11.755	0.00195126	0.0283562
ENSBTAG00000019940	-2.62433	1.76477	13.4918	0.00103693	0.0139871																ENSBTAG00000005938	3.07362	-1.54697	11.631	0.00204395	0.0346484		ENSBTAG00000014523	4.81711	-2.22231	12.1839	0.00195852	0.0284355
ENSBTAG00000014313	-2.15596	1.15951	13.4366	0.00105743	0.01416																ENSBTAG00000015926	2.62748	6.33474	11.6142	0.00205687	0.0346834		ENSBTAG00000017883	6.04959	-1.30155	12.1113	0.00200896	0.0288562
ENSBTAG00000048267	-3.37939	2.41167	13.4356	0.00105783	0.01416																ENSBTAG00000009396	-3.10707	2.52722	11.6088	0.00206103	0.0346834		ENSBTAG00000023039	2.77826	4.55532	11.6736	0.00201158	0.0288607
ENSBTAG00000006130	-3.169	3.87158	13.3909	0.00107477	0.0142814																ENSBTAG00000001920	-2.88474	2.83423	11.5953	0.00207154	0.0347689		ENSBTAG00000016619	-2.71657	2.63532	11.6505	0.00202907	0.0290575
ENSBTAG00000010069	-2.50778	7.02234	13.3888	0.00107556	0.0142814																ENSBTAG00000004022	2.72319	-1.39156	11.5907	0.0020751	0.0347689		ENSBTAG00000012637	-4.40607	0.0243783	11.6454	0.00203292	0.0290612
ENSBTAG00000024947	2.2251	2.63695	13.3843	0.00107729	0.0142814																ENSBTAG00000030686	-2.03037	0.807947	11.5708	0.00209066	0.0348783		ENSBTAG00000001503	2.88673	6.30043	11.6097	0.00206035	0.0293205
ENSBTAG00000011730	-3.577	5.61111	13.3808	0.00107866	0.0142814																ENSBTAG00000019801	2.67081	3.06408	11.5384	0.00211627	0.0350423		ENSBTAG00000015702	3.60626	3.31761	11.56	0.00209917	0.0296325
ENSBTAG00000007210	-3.28457	3.80676	13.3235	0.0011009	0.0145149																ENSBTAG00000012074	-2.18169	1.42749	11.4925	0.0021532	0.0351778		ENSBTAG00000009396	-3.08149	2.52722	11.5276	0.0021249	0.0299155
ENSBTAG00000014345	-5.7777	1.89112	13.2925	0.00111312	0.014615																ENSBTAG00000039937	2.70105	-0.746743	11.4822	0.00216156	0.0352369		ENSBTAG00000017743	3.37388	6.9088	11.5064	0.00214196	0.0300751
ENSBTAG00000000440	-2.43235	6.37123	13.1952	0.0011525	0.0150584																ENSBTAG00000003774	2.68497	-1.8868	11.2935	0.00231986	0.0368368		ENSBTAG00000046769	-3.91719	-1.81784	11.5035	0.00214425	0.0300805
ENSBTAG00000031184	-2.72206	8.27368	13.1718	0.00116222	0.0151338																ENSBTAG00000047594	-3.09286	-0.660764	11.2745	0.00233805	0.036936		ENSBTAG00000043971	2.39704	5.51573	11.4965	0.00214989	0.0301273
ENSBTAG00000021526	-3.451	3.26219	13.1596	0.00116728	0.0151747																ENSBTAG00000016667	2.24937	1.80264	11.2127	0.00239359	0.0376164		ENSBTAG00000014921	-3.99469	1.00901	11.4684	0.00217281	0.0303463
ENSBTAG00000039133	-2.00825	0.0371482	13.0779	0.00120201	0.0154858																ENSBTAG00000014466	2.73444	-1.08123	11.3938	0.00239542	0.0376164		ENSBTAG00000006882	-2.60109	4.57565	11.4616	0.00217842	0.0303709
ENSBTAG00000000945	-2.08777	4.76044	12.9825	0.00124395	0.0158593																ENSBTAG00000003692	-2.03677	5.1851	11.2013	0.00240399	0.037676		ENSBTAG00000015459	3.91105	-0.904902	11.4588	0.00218071	0.030376
ENSBTAG00000004388	-3.99801	-0.0510652	12.9663	0.00125123	0.0159249																ENSBTAG00000004488	2.75342	4.15986	11.1904	0.00241392	0.0377941		ENSBTAG00000047823	2.90135	-2.11238	12.114	0.00220941	0.0306103
ENSBTAG00000039524	-5.04564	-0.247953	12.9408	0.0012628	0.0160261																ENSBTAG00000025812	-2.69757	-1.33887	11.1854	0.00241848	0.0378281		ENSBTAG00000000752	-2.20428	3.59497	11.4239	0.00220956	0.0306103
ENSBTAG00000020000	-4.09301	3.16546	12.9223	0.00127127	0.0160597																ENSBTAG00000011981	-2.60883	2.81644	11.1818	0.00242183	0.0378429		ENSBTAG00000021735	-2.28143	-0.190219	11.4221	0.00221111	0.0306103
ENSBTAG00000005186	-2.06115	4.09104	12.9183	0.00127309	0.0160607																ENSBTAG00000020393	2.43443	-1.35281	11.1639	0.0024384	0.0378995		ENSBTAG00000000580	2.08787	-0.0314863	11.4184	0.00221419	0.0306261
ENSBTAG00000009294	-2.75972	-0.946326	12.8516	0.00130414	0.0162832																ENSBTAG00000002157	3.38761	5.48895	11.152	0.00244947	0.0378995		ENSBTAG00000038606	5.76815	-2.4621	11.8312	0.00221733	0.0306427
ENSBTAG00000006757	-2.25897	0.430541	12.8465	0.00130654	0.0163003																ENSBTAG00000018214	3.08926	5.84501	11.1228	0.00247685	0.0380991		ENSBTAG00000012137	-2.20196	4.17616	11.3902	0.00223787	0.0308725
ENSBTAG00000016341	-2.8041	2.07921	12.8398	0.0013097	0.0163138																ENSBTAG00000007492	2.45742	1.62118	11.1039	0.00249474	0.038249		ENSBTAG00000047807	-2.62878	1.41101	11.3872	0.00224044	0.0308809
ENSBTAG00000002631	-2.18952	-1.2082	12.8229	0.00131344	0.0163476																ENSBTAG00000004877	-2.15597	1.37989	11.1	0.00249845	0.038249		ENSBTAG00000010077	-2.32428	4.16211	11.3421	0.00227895	0.0310591
ENSBTAG00000002865	-3.71726	-0.00742791	12.7837	0.00133654	0.0165049																ENSBTAG00000005353	2.50762	10.7791	11.0671	0.00253006	0.0385419		ENSBTAG00000010522	3.31748	-2.19426	11.5155	0.00229039	0.0311585
ENSBTAG00000045925	-2.2893	2.15971	12.7635	0.00134636	0.0165971																ENSBTAG00000048267	2.53396	2.41167	11.0596	0.00253724	0.0385808		ENSBTAG00000019262	-2.92893	6.52892	11.3246	0.00229414	0.0311585
ENSBTAG00000010836	2.56146	-1.55991	12.7346	0.00135914	0.016682																ENSBTAG00000000973	-6.87994	-2.55941	12.4353	0.00256103	0.0387454		ENSBTAG00000007732	2.65957	6.24144	11.3131	0.00230413	0.0312403
ENSBTAG00000002964	-2.33343	3.97946	12.6675	0.0013941	0.0169374																ENSBTAG00000017060	2.68853	0.732597	11.0216	0.00257442	0.0387454		ENSBTAG00000002882	-2.19951	6.18194	11.2977	0.00231761	0.0313275
ENSBTAG00000002936	-2.04808	6.65911	12.6344	0.00141098	0.0170295																ENSBTAG00000014315	2.33528	-1.71454	11.0141	0.00257512	0.0387454		ENSBTAG00000003432	2.08236	0.437394	11.2642	0.00234722	0.0316263
ENSBTAG00000011713	-3.17797	-1.04089	12.6034	0.00142659	0.0171212																ENSBTAG00000033292	-3.94246	-0.0546801	10.9937	0.00260195	0.0388711		ENSBTAG00000014956	2.04038	4.77551	11.2482	0.00236152	0.0316649
ENSBTAG00000047491	-2.43765	5.16773	12.6008	0.00142838	0.0171297																ENSBTAG00000012034	2.76347	-0.271186	11.1448	0.00262693	0.0390585		ENSBTAG00000019743	-2.33148	3.81665	11.2266	0.00238095	0.0317009
ENSBTAG00000020661	-3.20593	4.08402	12.5589	0.00145034	0.017301																ENSBTAG00000002580	2.9895	3.50537	10.9579	0.00263794	0.0391277		ENSBTAG00000021272	2.90163	3.64596	11.221	0.00238599	0.0317009
ENSBTAG00000025136	-5.87175	2.45484	12.54	0.00146036	0.0173943																ENSBTAG00000021531	2.5897	-1.64942	10.9019	0.0026948	0.0397131		ENSBTAG00000010927	2.83712	4.33352	11.213	0.00239325	0.0317131
ENSBTAG00000012405	-2.65697	3.38536	12.5244	0.0014687	0.0174672																ENSBTAG00000015204	3.56749	6.5993	10.8797	0.00271825	0.0397813		ENSBTAG00000018566	2.75796	2.60864	11.1914	0.00241297	0.0317876
ENSBTAG00000007773	-6.03256	3.21177	12.5091	0.00147695	0.0175257																ENSBTAG00000021994	2.68363	-1.4154	10.8794	0.00271849	0.0397813		ENSBTAG00000038630	4.98432	-0.682605	11.183	0.00242076	0.031818
ENSBTAG00000004988	-3.06202	-0.258845	12.4557	0.00150604	0.0177774																ENSBTAG00000009218	-2.37956	7.19321	10.8776	0.00272039	0.0397813		ENSBTAG00000002644	3.07259	7.01501	11.1566	0.00244521	0.032105
ENSBTAG00000007768	3.40786	-2.32631	12.665	0.00151152	0.0178069																ENSBTAG00000026344	2.1831	1.30849	10.8699	0.00272843	0.0397813		ENSBTAG00000002620	-2.3646	2.30757	11.1438	0.00245716	0.0321549
ENSBTAG00000017746	-3.12419	3.74803	12.4261	0.00152246	0.0179042																ENSBTAG00000004221	-3.61866	5.48732	10.8649	0.00273369	0.0397813		ENSBTAG00000001414	2.72039	3.03632	11.1356	0.00246484	0.0322288
ENSBTAG00000003895	-2.22788	2.42827	12.4183	0.00152676	0.0179414																ENSBTAG00000021508	3.19963	7.29521	10.8593	0.00273957	0.0397813		ENSBTAG00000021709	2.3486	-0.139096	11.1273	0.00247263	0.0322772
ENSBTAG00000019574	-2.22206	3.40453	12.3753	0.00155106	0.0181056																ENSBTAG00000011730	2.94922	5.61111	10.7822	0.00282213	0.0405521		ENSBTAG00000014525	3.43004	4.72274	11.1167	0.00248261	0.0323427
ENSBTAG00000011896	-2.63524	2.67154	12.36	0.00155978	0.0181939																ENSBTAG00000047174	2.85687	7.07967	10.7512	0.00285604	0.0409021		ENSBTAG00000015595	-2.57041	5.56415	11.0739	0.00252342	0.0327237
ENSBTAG00000010239	-2.55423	-0.570815	12.3346	0.00157438	0.0182914																ENSBTAG00000003838	-2.14594	0.103586	10.7484	0.00285906	0.0409081		ENSBTAG00000038415	4.75902	-0.19364	11.2152	0.0025591	0.0330505
ENSBTAG00000045805	-2.89784	-1.57257	12.286	0.00160273	0.0185441																ENSBTAG00000021009	2.84627	6.64133	10.7092	0.00290264	0.0413501		ENSBTAG00000004869	2.40336	1.33338	11.0191	0.00257681	0.0331436
ENSBTAG00000015210	-2.63313	1.1058	12.2795	0.00160657	0.018575																ENSBTAG00000038630	4.86604	-0.682605	10.6361	0.0029858	0.0421851		ENSBTAG00000018843	4.2056	2.31851	11.1899	0.00258318	0.033193
ENSBTAG00000017690	-2.08015	4.55823	12.2697	0.00161237	0.0185988																ENSBTAG00000005762	2.36854	-0.386367	10.6357	0.00298635	0.0421851		ENSBTAG00000026626	3.56781	-2.13958	11.0048	0.00259093	0.0332439
ENSBTAG00000038361	3.27979	0.461637	12.4634	0.00162509	0.0186524																ENSBTAG00000023039	2.63447	4.55532	10.5999	0.00302803	0.0425189		ENSBTAG00000005164	-6.4421	-1.55908	11.1724	0.00260011	0.0332989
ENSBTAG00000017312	-7.66507	-0.825145	12.4519	0.00163177	0.018702																ENSBTAG00000018418	3.70236	-1.79241	10.5856	0.00304487	0.0425635		ENSBTAG00000018519	2.96201	3.02115	10.9942	0.00260155	0.0332989
ENSBTAG00000003692	2.08077	5.1851	12.2279	0.00163732	0.0187304																ENSBTAG00000014969	2.49965	-0.53481	10.5668	0.00306712	0.0426478		ENSBTAG00000034192	2.06333	-1.03984	10.984	0.00260678	0.033312
ENSBTAG00000030071	-3.01396	-1.3661	12.219	0.00164274	0.0187325																ENSBTAG00000007449	-3.21877	-0.677278	10.5568	0.00307906	0.0427385		ENSBTAG00000021673	-2.58229	4.34161	10.9003	0.00269683	0.0342369
ENSBTAG00000016138	-5.3078	-1.66115	12.4277	0.00164589	0.0187413																ENSBTAG00000002661	2.58276	0.65953	10.5545	0.00308177	0.0427385		ENSBTAG00000031888	-5.94679	-1.61794	11.2162	0.00276278	0.0348499
ENSBTAG00000003334	-3.60174	-1.27125	12.2109	0.00164762	0.0187475																ENSBTAG00000018765	2.53826	0.765093	10.5306	0.00311055	0.0428366		ENSBTAG00000005765	2.01093	3.7875	10.8091	0.00279297	0.0349947
ENSBTAG00000008013	-5.60674	-0.238279	12.3978	0.00166356	0.0189015																ENSBTAG00000006563	2.66952	6.00494	10.5235	0.00311911	0.0428587		ENSBTAG00000004085	-2.17888	4.11627	10.7976	0.00280535	0.0350919
ENSBTAG00000016973	-3.7789	1.79157	12.17	0.00167267	0.0189106																ENSBTAG00000004232	6.49309	-2.47044	11.8033	0.00312031	0.0428587		ENSBTAG00000010741	2.21383	9.422	10.7722	0.00283299	0.0352803
ENSBTAG00000019072	2.77888	-0.218132	12.1297	0.00169775	0.0190703																ENSBTAG00000046166	2.76309	0.513633	10.5147	0.00312977	0.0429514		ENSBTAG00000014078	-3.45637	-1.10343	10.7567	0.00284998	0.0353882
ENSBTAG00000040060	-2.2768	1.03505	12.1273	0.00169926	0.0190737																ENSBTAG00000045943	2.79015	8.32658	10.4807	0.00317141	0.0432969		ENSBTAG00000002821	2.14441	3.40649	10.746	0.00286168	0.0354776
ENSBTAG00000027425	-5.16405	-1.04085	12.2836	0.001733	0.0193561																ENSBTAG00000045010	2.15678	0.867619	10.4451	0.00321565	0.0437118		ENSBTAG00000019354	-2.17035	-0.200199	10.693	0.00292087	0.0360416
ENSBTAG00000030296	-5.52121	-1.80191	12.8301	0.00174136	0.0194083																ENSBTAG00000017509	2.70865	6.52222	10.4309	0.00323352	0.0437699		ENSBTAG00000015818	-4.61167	0.0663868	10.6765	0.00293951	0.0361585
ENSBTAG00000008868	-3.32251	5.39791	12.008	0.00177591	0.0196821																ENSBTAG00000001406	3.3244	-1.64658	10.4273	0.00323806	0.0437699		ENSBTAG00000019028	2.52861	-0.846821	10.6654	0.00295224	0.0361788
ENSBTAG00000019791	-4.00872	-1.75596	11.9721	0.00179971	0.0198622																ENSBTAG00000014508	2.78443	-1.98238	10.5371	0.00329952	0.0441671		ENSBTAG00000001706	2.59505	-1.22191	10.665	0.00295263	0.0361788
ENSBTAG00000031809	-4.87904	-2.16969	12.1085	0.00184567	0.020214																ENSBTAG00000002497	3.25448	-1.53798	10.3541	0.00333189	0.044412		ENSBTAG00000002092	3.55214	7.01445	10.6494	0.00297055	0.0362857
ENSBTAG00000007568	-5.71448	-0.238024	12.3387	0.00185559	0.0202945																ENSBTAG00000001078	2.23932	7.48414	10.351	0.0033359	0.044412		ENSBTAG00000046911	2.3215	-0.618639	10.6413	0.00297982	0.0363709
ENSBTAG00000014547	-3.26653	4.90443	11.8621	0.00187483	0.0204324																ENSBTAG00000026796	3.63672	-0.891246	10.9209	0.00334833	0.0445184		ENSBTAG00000021657	3.02108	1.2319	11.0042	0.00298371	0.0363902
ENSBTAG00000005604	-4.57093	1.75888	11.8605	0.00187597	0.0204324																ENSBTAG00000014525	3.28969	4.72274	10.3393	0.00335124	0.0445196		ENSBTAG00000015204	3.51819	6.5993	10.6272	0.0029962	0.0364299
ENSBTAG00000046543	3.47487	-1.6927	11.8163	0.00190711	0.0206434																ENSBTAG00000012025	2.09053	-1.09824	10.3333	0.00335689	0.0445571		ENSBTAG00000046046	5.67865	0.767672	11.2254	0.00300771	0.0365019
ENSBTAG00000038598	-5.61614	-0.84087	12.2399	0.0019206	0.0207609																ENSBTAG00000040193	2.72025	1.66662	10.3189	0.00337806	0.0446876		ENSBTAG00000005895	-2.78525	1.51217	10.6156	0.00300959	0.0365019
ENSBTAG00000030518	-2.44945	0.176354	11.7749	0.00193678	0.0208233																ENSBTAG00000046044	5.70103	-2.62063	11.5511	0.00338088	0.0446876		ENSBTAG00000001920	-2.72609	2.83423	10.5815	0.00304964	0.0368244
ENSBTAG00000002151	-5.50748	1.33465	11.9751	0.00193683	0.0208233																ENSBTAG00000037651	2.14491	6.2006	10.3035	0.00339839	0.0448509		ENSBTAG00000016726	-2.51218	3.79447	10.5748	0.00305763	0.0368645
ENSBTAG00000013066	-2.54672	10.0422	11.7602	0.00194746	0.0208233																ENSBTAG00000002680	-2.36179	0.716024	10.2886	0.00341834	0.0449568		ENSBTAG00000029826	2.65398	3.30777	10.5345	0.00310579	0.0371008
ENSBTAG00000039340	-4.50867	-0.834486	11.9054	0.00198641	0.0210258																ENSBTAG00000021434	-5.48846	-0.953156	10.5846	0.00348013	0.0454179		ENSBTAG00000001058	2.05407	5.55213	10.5335	0.00310706	0.0371008
ENSBTAG00000001812	-4.37602	-1.56559	11.6929	0.00199707	0.0210962																ENSBTAG00000021132	2.62356	6.25307	10.2344	0.00349167	0.0454757		ENSBTAG00000006019	2.37244	1.64465	10.5119	0.00313314	0.0373186
ENSBTAG00000019159	-3.3376	-0.111936	11.6684	0.00201548	0.0212196																ENSBTAG00000021657	2.95687	1.2319	10.5751	0.00349237	0.0454757		ENSBTAG00000007550	4.36214	-0.519149	10.5063	0.00314003	0.0373725
ENSBTAG00000048210	-3.09342	4.25743	11.6511	0.00202865	0.0213015																ENSBTAG00000029906	3.16061	0.257559	10.38	0.00350445	0.0455579		ENSBTAG00000000987	2.42772	5.70876	10.4944	0.00315457	0.037489
ENSBTAG00000013015	-4.04186	2.34693	11.6478	0.00203116	0.0213137																ENSBTAG00000020003	-2.91882	-0.0657873	10.2192	0.00351256	0.0455727		ENSBTAG00000047347	-2.24919	2.7753	10.4903	0.00315961	0.0375079
ENSBTAG00000014058	-2.31029	3.16814	11.6413	0.00203608	0.0213175																ENSBTAG00000010986	2.16662	2.23569	10.2108	0.00352419	0.0455891		ENSBTAG00000017366	2.9013	-1.18842	10.4595	0.00319765	0.0376732
ENSBTAG00000020385	2.74933	-1.40224	11.6353	0.00204063	0.021328																ENSBTAG00000037794	2.90081	5.10803	10.3497	0.00354521	0.045689		ENSBTAG00000031346	3.57829	1.09018	10.4568	0.0032011	0.0376732
ENSBTAG00000006232	-2.46802	3.36688	11.6113	0.00205914	0.0214787																ENSBTAG00000019028	2.47678	-0.846821	10.1906	0.00355225	0.045689		ENSBTAG00000005431	-2.22461	3.16921	10.4435	0.00321766	0.0378399
ENSBTAG00000021777	-2.35858	-0.628223	11.5935	0.00207289	0.0215937																ENSBTAG00000008013	2.75815	-0.238279	10.2961	0.00361859	0.0462726		ENSBTAG00000039935	2.20542	-0.0256301	10.4387	0.00322376	0.0378579
ENSBTAG00000001443	-4.95727	-0.267869	11.5581	0.00210066	0.0217732																ENSBTAG00000039709	-2.15667	2.72279	10.1001	0.00368087	0.0466598		ENSBTAG00000023797	-5.22421	-0.323698	10.5881	0.0032377	0.0379623
ENSBTAG00000018493	2.00035	3.68891	11.4379	0.00219792	0.0224515																ENSBTAG00000020954	2.45809	0.511501	10.0819	0.00370747	0.046884		ENSBTAG00000008763	3.6482	5.25338	10.5749	0.00325386	0.0380389
ENSBTAG00000022714	-4.56671	4.1298	11.4325	0.00220242	0.0224829																ENSBTAG00000001503	2.66557	6.30043	10.074	0.00371892	0.0469731		ENSBTAG00000014011	2.12362	1.41161	10.3398	0.00335056	0.0386815
ENSBTAG00000004944	-2.53777	-0.776775	11.3712	0.00225401	0.022847																ENSBTAG00000001851	4.64067	0.943086	10.2092	0.00374128	0.0470477		ENSBTAG00000045943	2.76375	8.32658	10.3058	0.00339539	0.0390545
ENSBTAG00000020620	-3.2594	-0.790667	11.3571	0.00226609	0.02294																ENSBTAG00000031217	2.55872	9.11196	10.0439	0.00376343	0.0471532		ENSBTAG00000019585	2.28337	6.35759	10.3041	0.00339766	0.0390545
ENSBTAG00000018164	-2.30703	4.54933	11.3116	0.00230546	0.0232193																ENSBTAG00000010179	2.24265	5.87727	9.99235	0.00384084	0.0478045		ENSBTAG00000020283	-2.11468	1.78047	10.2966	0.00340756	0.0390829
ENSBTAG00000014162	-2.91765	1.11704	11.2987	0.00231674	0.0232587																ENSBTAG00000046280	4.41806	-2.23725	10.3092	0.00385478	0.0478637		ENSBTAG00000012034	2.67324	-0.271186	10.4467	0.0034164	0.0391559
ENSBTAG00000040244	2.79056	-1.74298	11.2943	0.00231852	0.0232618																ENSBTAG00000005708	-2.23686	3.30838	9.97497	0.00386733	0.0479076		ENSBTAG00000006591	-2.34715	3.7912	10.2803	0.00342939	0.0392477
ENSBTAG00000010578	-3.43398	2.68016	11.245	0.00236438	0.0235791																ENSBTAG00000005604	2.81764	1.75888	9.93542	0.00392835	0.0483221		ENSBTAG00000009218	-2.30582	7.19321	10.2753	0.0034362	0.0392972
ENSBTAG00000002931	-3.57197	4.53457	11.2442	0.00236509	0.0235791																ENSBTAG00000008329	2.89448	3.88816	9.9166	0.00395775	0.0485476		ENSBTAG00000006864	3.27767	6.02834	10.2623	0.00345364	0.0394109
ENSBTAG00000006984	-2.42125	5.82871	11.176	0.00242715	0.0239558																ENSBTAG00000020524	3.37962	-2.25519	10.2344	0.00396409	0.0485724		ENSBTAG00000001139	2.01568	3.47775	10.2578	0.00345983	0.0394246
ENSBTAG00000037811	-3.17782	5.47375	11.148	0.00245324	0.0241227																ENSBTAG00000046725	2.66392	8.15507	9.89194	0.00399664	0.0486793		ENSBTAG00000002087	-7.47177	0.359858	10.406	0.00346982	0.0395099
ENSBTAG00000017273	-3.27746	-0.72698	11.1393	0.00246131	0.024172																ENSBTAG00000047957	2.39258	6.43191	9.89141	0.00399749	0.0486793		ENSBTAG00000033422	2.78135	3.73842	10.216	0.00351695	0.0399116
ENSBTAG00000016125	-5.42459	0.318085	11.3083	0.00247222	0.0242641																ENSBTAG00000000418	2.36192	0.445788	9.83171	0.00409339	0.0495793		ENSBTAG00000012737	-2.44631	1.14342	10.2099	0.0035254	0.0399116
ENSBTAG00000046158	-4.60588	4.7735	11.1076	0.00249127	0.0244055																							ENSBTAG00000021484	-2.20918	0.815477	10.2055	0.00353147	0.0399116
ENSBTAG00000020939	-2.23405	4.00855	11.0855	0.00251231	0.0244909																							ENSBTAG00000017812	2.19898	1.69718	10.1877	0.00355628	0.0400322
ENSBTAG00000007109	-2.64556	4.99906	11.0459	0.00255054	0.0247861																							ENSBTAG00000039337	3.4292	-1.45873	10.3211	0.00358414	0.040174
ENSBTAG00000045567	-2.18079	-0.750323	11.0319	0.00256305	0.0248632																							ENSBTAG00000003994	2.21643	6.10642	10.1435	0.00361861	0.0404168
ENSBTAG00000004547	-2.2904	2.76234	11.0283	0.00256775	0.0248921																							ENSBTAG00000013167	2.04553	-1.16132	10.0967	0.00368302	0.0408184
ENSBTAG00000011666	-5.47388	-1.8048	10.966	0.00262977	0.0253376																							ENSBTAG00000006563	2.6084	6.00494	10.0938	0.00369014	0.0408399
ENSBTAG00000002174	-4.60155	-0.59733	10.958	0.0026378	0.025384																							ENSBTAG00000046640	2.72727	-0.34883	10.0884	0.00369792	0.0408402
ENSBTAG00000001051	-4.54082	-0.520087	10.9357	0.0026604	0.0255051																							ENSBTAG00000001936	2.18897	-0.61248	10.0852	0.00370261	0.04086
ENSBTAG00000048017	-2.13663	0.436518	10.9282	0.00266815	0.0255359																							ENSBTAG00000005390	-3.45627	-1.36139	10.0669	0.00372946	0.0410728
ENSBTAG00000021434	2.75621	-0.953156	11.2947	0.00268562	0.0256565																							ENSBTAG00000006520	3.30925	-0.678824	10.0616	0.0037372	0.0410728
ENSBTAG00000000238	-2.47678	3.26207	10.8704	0.00272792	0.0259974																							ENSBTAG00000008111	-2.53118	-0.209634	10.0538	0.0037488	0.0410823
ENSBTAG00000043993	-2.1835	0.570779	10.8681	0.00273036	0.0259974																							ENSBTAG00000002023	2.61385	0.375197	10.0536	0.00374904	0.0410823
ENSBTAG00000021189	-4.10798	2.92629	10.8433	0.00275654	0.026142																							ENSBTAG00000020393	2.3124	-1.35281	10.0467	0.00375928	0.041089
ENSBTAG00000009742	-2.13083	4.77471	10.8134	0.00278838	0.026304																							ENSBTAG00000007445	3.06194	-0.984294	10.0251	0.00379144	0.0412665
ENSBTAG00000030517	-3.05065	-0.319127	10.7606	0.00284567	0.0266214																							ENSBTAG00000008158	-2.23492	-0.521201	10.0136	0.00380866	0.0414254
ENSBTAG00000047118	-3.04079	3.33321	10.6772	0.00293875	0.0271861																							ENSBTAG00000020000	2.94013	3.16546	9.99056	0.00384355	0.0415865
ENSBTAG00000019428	-3.73036	-0.5632	10.6627	0.00295533	0.0272595																							ENSBTAG00000047594	-2.77674	-0.660764	9.94719	0.00391008	0.0419218
ENSBTAG00000003275	-2.35116	3.112	10.6313	0.00299145	0.0274005																							ENSBTAG00000021681	-2.80413	2.59815	9.91633	0.00395817	0.042208
ENSBTAG00000017104	-2.2879	0.926541	10.6242	0.00299963	0.0274436																							ENSBTAG00000011390	2.95262	6.49934	9.8991	0.00398531	0.0423829
ENSBTAG00000006805	-2.23573	5.07576	10.5795	0.00305209	0.0277291																							ENSBTAG00000005776	2.2034	-0.384851	9.8879	0.00400306	0.0424857
ENSBTAG00000019517	-2.16802	8.0199	10.5732	0.00305951	0.0277438																							ENSBTAG00000001009	2.09689	-0.974632	9.86455	0.00403831	0.0427399
ENSBTAG00000019107	-2.8213	2.98908	10.5701	0.00306316	0.0277438																							ENSBTAG00000005965	2.89845	0.296905	9.7836	0.00417248	0.0433108
ENSBTAG00000020105	-6.70198	1.59419	10.7331	0.00306496	0.0277438																							ENSBTAG00000017509	2.61265	6.52222	9.77847	0.00418102	0.043354
ENSBTAG00000026236	-3.66211	0.662309	10.562	0.00307281	0.0277749																							ENSBTAG00000048267	2.371	2.41167	9.7706	0.00419415	0.043455
ENSBTAG00000031135	-6.72342	1.10803	10.6883	0.00311723	0.02808																							ENSBTAG00000016063	-2.4264	0.126995	9.75953	0.00421269	0.0435679
ENSBTAG00000024219	-3.68075	-0.12103	10.4961	0.00315243	0.0283733																							ENSBTAG00000018185	2.55471	1.16781	9.73251	0.00425831	0.0439821
ENSBTAG00000030322	2.24817	2.13074	10.4237	0.00324265	0.0290439																							ENSBTAG00000019669	2.07929	0.928657	9.72242	0.00427549	0.0440914
ENSBTAG00000004206	-3.78408	3.04994	10.3429	0.00334651	0.0296878																							ENSBTAG00000011558	3.59264	-1.98716	9.8499	0.00429854	0.0442528
ENSBTAG00000018137	-4.16494	4.43216	10.2978	0.00340602	0.0300301																							ENSBTAG00000024449	-2.84962	6.05499	9.7001	0.00431374	0.0443514
ENSBTAG00000005365	-3.02154	-0.93769	10.2619	0.00345427	0.0303537																							ENSBTAG00000021066	2.11962	5.12912	9.69639	0.00432013	0.0443593
ENSBTAG00000007423	-2.74451	-1.14675	10.2531	0.00346256	0.0303961																							ENSBTAG00000003369	2.4598	1.90296	9.67292	0.00436083	0.044719
ENSBTAG00000046063	-2.64316	-0.891521	10.2142	0.00351946	0.0307383																							ENSBTAG00000001078	2.15504	7.48414	9.64438	0.00441088	0.0451058
ENSBTAG00000016739	-2.43733	-0.981933	10.1716	0.00357883	0.030979																							ENSBTAG00000010384	-2.36798	3.03239	9.6303	0.00443582	0.0451943
ENSBTAG00000009064	-2.72979	-0.836768	10.1705	0.00358041	0.030979																							ENSBTAG00000002444	-3.1479	8.19152	9.62847	0.00443906	0.0451982
ENSBTAG00000039861	-4.88688	2.99533	10.1677	0.00358432	0.030979																							ENSBTAG00000007828	2.74402	-1.65194	9.61814	0.00445575	0.0453389
ENSBTAG00000019244	-2.41353	1.28384	10.1391	0.00362478	0.0311921																							ENSBTAG00000047174	2.68195	7.07967	9.61024	0.00447158	0.0454414
ENSBTAG00000013843	-3.26532	2.79658	10.1262	0.00364333	0.0313036																							ENSBTAG00000021823	2.59981	4.16186	9.59387	0.004501	0.0456276
ENSBTAG00000033554	-2.06303	3.11162	10.0866	0.00370057	0.0316373																							ENSBTAG00000043953	2.44504	0.732221	9.5927	0.00450311	0.0456276
ENSBTAG00000010462	-2.25183	3.86924	10.0728	0.00372075	0.031721																							ENSBTAG00000006903	3.99693	-2.20105	9.59201	0.00450436	0.0456276
ENSBTAG00000012888	-3.50991	0.989442	10.0489	0.00375602	0.0319211																							ENSBTAG00000002497	3.14186	-1.53798	9.58259	0.0045214	0.0457144
ENSBTAG00000022564	-4.32846	-1.34988	10.0448	0.00376208	0.0319554																							ENSBTAG00000020080	2.42044	4.10195	9.55712	0.00456783	0.0459287
ENSBTAG00000012623	-2.28107	1.89767	10.03	0.00378406	0.0321075																							ENSBTAG00000040279	2.54767	2.25246	9.69344	0.004569	0.0459287
ENSBTAG00000020269	-2.45488	-1.74077	10.0184	0.00379287	0.032165																							ENSBTAG00000008004	4.26303	-1.24155	9.53043	0.00461704	0.0461575
ENSBTAG00000003864	-3.18013	0.157411	10.0049	0.00382185	0.032376																							ENSBTAG00000037778	-2.58713	1.42828	9.51189	0.00465156	0.0463643
ENSBTAG00000033128	-5.30792	-1.80302	10.2811	0.00389549	0.0326666																							ENSBTAG00000037533	2.73699	7.32068	9.5097	0.00465564	0.0463643
ENSBTAG00000002080	-3.03753	8.3721	9.94156	0.00391881	0.0327846																							ENSBTAG00000007782	2.38374	4.91387	9.45622	0.0047569	0.0468916
ENSBTAG00000000102	2.02292	0.604356	9.90606	0.00397433	0.0330776																							ENSBTAG00000047284	4.27095	-2.10266	9.42093	0.00482501	0.0472971
ENSBTAG00000024470	-2.69548	-1.92502	9.89615	0.00398165	0.0330869																							ENSBTAG00000038173	-3.5821	-1.45477	9.40465	0.0048568	0.0473558
ENSBTAG00000012837	-2.78486	4.74868	9.81762	0.00411638	0.033871																							ENSBTAG00000030444	3.47587	-1.59172	9.5222	0.00488646	0.0475745
ENSBTAG00000027409	-2.03173	0.203033	9.79493	0.00415372	0.0341249																							ENSBTAG00000007241	-2.77881	1.98386	9.35815	0.00494884	0.0480549
ENSBTAG00000030543	-3.40215	4.00616	9.78494	0.00417026	0.0341984																							ENSBTAG00000040193	2.58116	1.66662	9.35553	0.00495408	0.0480549
ENSBTAG00000030882	-2.48588	-1.76497	10.4795	0.00419306	0.0343053																							ENSBTAG00000002035	2.66341	-1.18417	9.34359	0.00497804	0.0481984
ENSBTAG00000021251	-3.07607	-1.63838	9.89704	0.00421347	0.0343476																							ENSBTAG00000009292	-2.12373	2.01029	9.32846	0.0050086	0.0483731
ENSBTAG00000020190	-3.82713	-1.3201	9.74989	0.00422889	0.0343911																							ENSBTAG00000046725	2.57738	8.15507	9.32369	0.00501826	0.0484096
ENSBTAG00000000698	-2.12043	5.90931	9.72531	0.00427055	0.0345906																							ENSBTAG00000003353	2.06287	2.51469	9.28799	0.00509132	0.048816
ENSBTAG00000015118	-2.8127	-0.196272	9.72414	0.00427256	0.0345906																							ENSBTAG00000046601	-2.51917	2.12609	9.26438	0.00514026	0.0491658
ENSBTAG00000020568	2.41428	-1.57728	9.6449	0.00440997	0.0354189																							ENSBTAG00000014435	-2.05252	3.93879	9.25992	0.00514955	0.0492248
ENSBTAG00000040323	-3.94442	1.37926	9.60867	0.0044744	0.0358452																							ENSBTAG00000021009	2.62232	6.64133	9.25477	0.00516032	0.0492681
ENSBTAG00000046277	-2.73291	0.366685	9.58504	0.00451697	0.0360763																							ENSBTAG00000008493	4.26111	0.0813227	9.25195	0.00516622	0.0492946
ENSBTAG00000014225	-2.02724	0.379175	9.56961	0.00454499	0.0362085																							ENSBTAG00000020837	-2.25151	0.25413	9.22999	0.00521246	0.0494668
ENSBTAG00000018773	-3.24093	1.04623	9.53875	0.00460163	0.0364756																							ENSBTAG00000011944	2.15703	1.63741	9.21637	0.00524136	0.0495621
ENSBTAG00000006276	-2.3247	5.29954	9.45609	0.00475715	0.0373519																							ENSBTAG00000001032	3.17261	5.42982	9.21414	0.00524612	0.0495774
ENSBTAG00000000973	-4.46056	-2.55941	10.4872	0.00478567	0.0375199																							ENSBTAG00000010880	3.43675	7.25606	9.21097	0.00525287	0.0495818
ENSBTAG00000001100	-3.95119	-0.659997	9.43891	0.00479019	0.0375366																							ENSBTAG00000005162	2.47568	-1.81395	9.20603	0.00526168	0.0495985
ENSBTAG00000006538	-2.31698	1.72431	9.34977	0.00496563	0.0383527																							ENSBTAG00000017138	-3.84349	-1.54544	9.19104	0.00529558	0.0496588
ENSBTAG00000012846	-2.7755	2.42853	9.34799	0.0049692	0.0383527																							ENSBTAG00000026067	3.67755	-0.836201	9.30245	0.00532966	0.0498458
ENSBTAG00000018077	-2.605	0.210593	9.34729	0.0049706	0.0383527																							ENSBTAG00000006035	2.37386	2.91609	9.15286	0.00537844	0.0499036
ENSBTAG00000013766	2.07315	-0.945933	9.33285	0.00499971	0.0384717
ENSBTAG00000006762	-3.16282	-0.560824	9.30716	0.00505194	0.0386305
ENSBTAG00000021906	-2.08579	3.91488	9.24715	0.00517629	0.0392185
ENSBTAG00000011854	-2.05287	4.30161	9.23756	0.00519646	0.0393147
ENSBTAG00000046409	-2.75473	2.33812	9.18762	0.00530293	0.0399479
ENSBTAG00000047481	-7.60343	-0.0269241	9.30492	0.00532443	0.0400525
ENSBTAG00000011551	-2.15432	0.580693	9.15582	0.00537197	0.0402566
ENSBTAG00000029906	-5.58803	0.257559	9.26929	0.00540026	0.0403727
ENSBTAG00000006694	-5.86119	2.63673	9.08986	0.00551828	0.0407972
ENSBTAG00000003640	-5.41725	-0.64493	9.21454	0.00551908	0.0407972
ENSBTAG00000021480	-2.20309	1.05418	9.07769	0.00554576	0.0409561
ENSBTAG00000040490	-2.26152	4.50583	9.07404	0.00555401	0.0409979
ENSBTAG00000045965	-5.62454	2.41423	9.02021	0.00567751	0.0415403
ENSBTAG00000038183	-2.09381	-0.784678	8.99935	0.00572617	0.0417091
ENSBTAG00000046332	-2.25495	11.1183	8.99842	0.00572834	0.0417091
ENSBTAG00000042679	-2.43589	-0.955631	8.97501	0.00578349	0.0419656
ENSBTAG00000010464	-2.61441	1.02199	8.96888	0.00579804	0.041997
ENSBTAG00000000044	-5.89379	1.20676	9.04594	0.00590332	0.0424834
ENSBTAG00000006256	-2.60291	-1.45862	8.86298	0.0060556	0.0433225
ENSBTAG00000006934	-5.31898	-1.0238	9.11578	0.00607821	0.0433663
ENSBTAG00000014026	2.37044	2.68798	8.84614	0.0060977	0.0434659
ENSBTAG00000021139	3.66143	-1.18169	8.80954	0.00619028	0.0438291
ENSBTAG00000017411	-2.36735	1.65361	8.79507	0.00622729	0.0439576
ENSBTAG00000012034	-3.80308	-0.271186	8.9086	0.00623795	0.0439576
ENSBTAG00000014628	-5.0155	1.7656	8.78394	0.00625595	0.0439783
ENSBTAG00000009614	-3.11092	-1.48711	8.7758	0.00627699	0.0440479
ENSBTAG00000019212	-2.57855	1.45102	8.77555	0.00627763	0.0440479
ENSBTAG00000003920	-2.18824	-1.1445	8.76108	0.0063125	0.0441987
ENSBTAG00000047087	3.20573	-1.23295	8.86461	0.00634947	0.0444244
ENSBTAG00000018432	-3.00689	-0.255221	8.74622	0.00635407	0.0444307
ENSBTAG00000017761	2.05333	5.60035	8.71999	0.00642331	0.0447561
ENSBTAG00000001219	-4.85233	1.56561	8.638	0.00664507	0.0459967
ENSBTAG00000009155	-3.20334	3.98778	8.60013	0.0067503	0.0466251
ENSBTAG00000008553	-3.91589	0.46149	8.59092	0.00677617	0.0467402
ENSBTAG00000000845	-2.82471	-0.0969069	8.52529	0.00696363	0.0475346
ENSBTAG00000015775	-4.39676	-2.31952	8.63059	0.00698063	0.0475469
ENSBTAG00000006745	-3.20508	-1.68717	8.45767	0.00716271	0.0480307
ENSBTAG00000015690	-2.28338	-0.183112	8.45131	0.00718173	0.0480874
ENSBTAG00000042543	-2.44791	-1.42726	8.41426	0.00729377	0.0484309
ENSBTAG00000048049	-4.90725	1.71912	8.40958	0.00730803	0.0484602
ENSBTAG00000002749	-3.94783	-1.00483	8.50883	0.00733592	0.0486043
ENSBTAG00000008934	2.0414	5.44028	8.36262	0.00745307	0.049092
ENSBTAG00000020350	-2.87537	-0.880658	8.35819	0.00746692	0.049103
ENSBTAG00000047436	-2.16117	0.162858	8.32449	0.00757313	0.0495017
ENSBTAG00000018707	-2.35473	5.20175	8.2911	0.00768	0.0498379

## Sheet: SM
SM: d1 vs d0							SM: d2 vs d0							SM: d4 vs d0							SM: d7 vs d0							SM: d14 vs d0
ENSEMBL	logFC	logCPM	F	PValue	FDR		ENSEMBL	logFC	logCPM	F	PValue	FDR		ENSEMBL	logFC	logCPM	F	PValue	FDR		ENSEMBL	logFC	logCPM	F	PValue	FDR		ENSEMBL	logFC	logCPM	F	PValue	FDR
ENSBTAG00000029897	-2.59036	2.02466	40.3039	8.24943e-07	0.00466383									ENSBTAG00000004896	2.76637	6.52912	57.4903	3.58031e-08	0.000388569		ENSBTAG00000002853	5.91175	4.06775	53.971	6.43309e-08	0.000503077		ENSBTAG00000007661	2.46116	2.86348	68.3426	6.63531e-09	7.94873e-05
ENSBTAG00000019093	-2.61538	3.02628	37.5421	1.47758e-06	0.00466383									ENSBTAG00000001564	2.92984	8.75128	50.3769	1.20302e-07	0.000388569		ENSBTAG00000001564	2.93591	8.75128	50.5586	1.16473e-07	0.000503077		ENSBTAG00000015460	5.43267	1.41354	60.1322	2.34357e-08	7.94873e-05
ENSBTAG00000040060	-4.0283	1.03505	34.3586	2.98195e-06	0.00528704									ENSBTAG00000010704	2.32507	4.8323	50.3317	1.21276e-07	0.000388569		ENSBTAG00000004896	2.52158	6.52912	48.6758	1.63488e-07	0.000503077		ENSBTAG00000002853	6.17533	4.06775	57.8182	3.39437e-08	7.94873e-05
ENSBTAG00000023289	-3.89021	-0.390702	32.5419	4.5288e-06	0.00528704									ENSBTAG00000044046	2.13659	4.71689	49.5618	1.39228e-07	0.000388569		ENSBTAG00000026684	2.17641	6.7093	47.918	1.87852e-07	0.000503077		ENSBTAG00000044046	2.30422	4.71689	57.0048	3.87596e-08	7.94873e-05
ENSBTAG00000004508	-6.48427	-0.123907	33.3667	4.96175e-06	0.00528704									ENSBTAG00000016290	2.30266	4.98308	49.2337	1.47726e-07	0.000388569		ENSBTAG00000044046	2.08577	4.71689	47.3467	2.08794e-07	0.000503077		ENSBTAG00000008868	7.69016	5.39791	56.6111	4.13498e-08	7.94873e-05
ENSBTAG00000047374	-5.49764	-0.824631	31.5696	5.69507e-06	0.00528704									ENSBTAG00000006338	3.24612	2.57155	45.4182	3.00181e-07	0.000532285		ENSBTAG00000008868	6.68349	5.39791	45.9923	2.69154e-07	0.000503077		ENSBTAG00000001564	3.11524	8.75128	56.0551	4.53292e-08	7.94873e-05
ENSBTAG00000006862	-2.09821	4.37162	30.6848	7.04015e-06	0.00566122									ENSBTAG00000014719	2.76385	6.82849	45.3598	3.03546e-07	0.000532285		ENSBTAG00000014541	-2.03521	5.66308	45.5981	2.90061e-07	0.000503077		ENSBTAG00000034867	2.10174	3.68138	54.4728	5.88773e-08	8.67135e-05
ENSBTAG00000006870	-2.32231	1.83997	28.9089	1.08877e-05	0.00747083									ENSBTAG00000007782	6.52072	4.91387	43.9684	3.96985e-07	0.000569565		ENSBTAG00000007782	6.61395	4.91387	44.9456	3.28604e-07	0.000503077		ENSBTAG00000004732	4.2589	5.41206	54.2021	6.18538e-08	8.67135e-05
ENSBTAG00000044624	-2.28812	0.612561	28.5615	1.17659e-05	0.00758035									ENSBTAG00000002853	5.07969	4.06775	42.114	5.72556e-07	0.000691501		ENSBTAG00000006823	4.45004	5.98082	44.4098	3.64376e-07	0.000503077		ENSBTAG00000016013	2.33258	2.86699	53.7738	6.59334e-08	8.67135e-05
ENSBTAG00000029886	-2.83053	1.28431	26.8459	1.84087e-05	0.00830073									ENSBTAG00000006491	3.7064	6.54025	41.1103	7.01053e-07	0.000691501		ENSBTAG00000045889	6.49142	3.8715	44.1592	3.8252e-07	0.000503077		ENSBTAG00000008483	2.92902	4.2142	52.8271	7.82676e-08	8.76394e-05
ENSBTAG00000025226	-3.00157	0.675824	26.1092	2.2321e-05	0.0094374									ENSBTAG00000021992	2.90371	7.00683	39.3205	1.01372e-06	0.000857703		ENSBTAG00000013117	4.77548	3.83428	42.9662	4.83269e-07	0.000544782		ENSBTAG00000002151	7.96576	1.33465	55.5435	8.01312e-08	8.76394e-05
ENSBTAG00000019382	-2.33318	5.34171	24.4792	3.45432e-05	0.01239									ENSBTAG00000018465	2.3396	3.12691	38.1807	1.28903e-06	0.000857703		ENSBTAG00000002151	7.08569	1.33465	44.5242	5.25211e-07	0.000552592		ENSBTAG00000006823	4.94335	5.98082	52.4673	8.32968e-08	8.76394e-05
ENSBTAG00000021430	-2.73522	1.495	24.3175	3.6101e-05	0.012661									ENSBTAG00000014003	3.40869	4.81264	38.1099	1.3086e-06	0.000857703		ENSBTAG00000004732	3.61761	5.41206	41.3507	6.67679e-07	0.000619841		ENSBTAG00000018204	9.56149	5.26335	53.9317	1.03712e-07	9.65407e-05
ENSBTAG00000020469	2.44214	1.34423	23.8481	4.10684e-05	0.0130066									ENSBTAG00000002574	4.97884	7.16387	37.6405	1.44668e-06	0.000878137		ENSBTAG00000008483	2.5423	4.2142	40.9315	7.2703e-07	0.000637444		ENSBTAG00000007423	5.23137	-1.14675	50.8298	1.10109e-07	9.65407e-05
ENSBTAG00000008419	-5.09339	6.25282	23.6388	4.35162e-05	0.0134661									ENSBTAG00000004079	3.96897	9.11776	36.9394	1.68292e-06	0.000903792		ENSBTAG00000006733	7.35342	4.39469	41.5064	9.27324e-07	0.000698094		ENSBTAG00000018747	2.84771	1.35955	49.8659	1.29844e-07	0.000104523
ENSBTAG00000011888	-2.32158	1.93043	23.4504	4.58541e-05	0.0137088									ENSBTAG00000011548	6.8865	5.9469	36.9085	1.69425e-06	0.000903792		ENSBTAG00000015460	4.27234	1.41354	39.597	9.56944e-07	0.000698094		ENSBTAG00000004896	2.55473	6.52912	49.8388	1.32459e-07	0.000104523
ENSBTAG00000007850	-2.59445	0.155822	23.295	4.7728e-05	0.013949									ENSBTAG00000038462	5.70943	4.99633	36.8444	1.71802e-06	0.000903792		ENSBTAG00000006491	3.61667	6.54025	39.4468	9.8735e-07	0.000698094		ENSBTAG00000020679	4.44051	1.53922	48.8704	1.57793e-07	0.000118585
ENSBTAG00000039696	-3.92063	0.699716	22.8371	5.44498e-05	0.0153225									ENSBTAG00000046484	2.06945	6.15707	35.8541	2.13425e-06	0.000962362		ENSBTAG00000011392	7.48296	6.83163	39.0767	1.06679e-06	0.000701506		ENSBTAG00000006491	4.09824	6.54025	48.5219	1.68145e-07	0.000119365
ENSBTAG00000008807	-4.05368	1.9349	22.6538	5.7343e-05	0.015412									ENSBTAG00000012919	2.68075	4.98581	35.6295	2.24299e-06	0.000983303		ENSBTAG00000004079	4.07402	9.11776	38.539	1.1947e-06	0.000754191		ENSBTAG00000014541	-2.10022	5.66308	48.3362	1.73957e-07	0.000119365
ENSBTAG00000032292	-3.33852	-0.0576539	22.57	5.87223e-05	0.015412									ENSBTAG00000020742	2.12785	2.86381	35.2472	2.44202e-06	0.000988204		ENSBTAG00000018465	2.3451	3.12691	38.3017	1.25631e-06	0.000759757		ENSBTAG00000016357	8.93121	-0.771345	49.2072	2.28135e-07	0.000138478
ENSBTAG00000002473	3.18162	2.89126	22.2041	6.51701e-05	0.015412									ENSBTAG00000003741	3.07086	3.40603	35.0197	2.56946e-06	0.00101378		ENSBTAG00000010704	2.00395	4.8323	38.1416	1.2998e-06	0.000759757		ENSBTAG00000010175	4.24891	4.25117	45.8555	2.76222e-07	0.000142297
ENSBTAG00000006349	-2.28994	2.95301	21.855	7.20377e-05	0.015412									ENSBTAG00000012097	3.85976	-0.0458248	34.7973	2.70089e-06	0.00103964		ENSBTAG00000013462	-2.62355	3.99764	37.4947	1.49272e-06	0.000803867		ENSBTAG00000007782	6.67025	4.91387	45.5433	2.93102e-07	0.000142297
ENSBTAG00000013160	-2.82697	2.45519	21.3836	8.25753e-05	0.0157012									ENSBTAG00000008842	2.90848	5.25345	33.9958	3.23808e-06	0.00111789		ENSBTAG00000018204	7.75741	5.26335	39.0765	1.49474e-06	0.000803867		ENSBTAG00000007090	9.05618	6.40816	45.4975	2.95675e-07	0.000142297
ENSBTAG00000010520	-2.35155	2.53991	21.1559	8.82483e-05	0.0162011									ENSBTAG00000007444	4.53454	5.22814	33.835	3.35913e-06	0.00111789		ENSBTAG00000011548	6.83216	5.9469	36.4755	1.86185e-06	0.00088927		ENSBTAG00000013462	-2.91605	3.99764	45.0572	3.21641e-07	0.000142297
ENSBTAG00000018160	2.57311	1.09612	21.1545	8.82837e-05	0.0162011									ENSBTAG00000017719	3.77266	5.51824	33.7227	3.44646e-06	0.00111789		ENSBTAG00000008866	2.35376	4.70539	36.442	1.87553e-06	0.00088927		ENSBTAG00000018465	2.55785	3.12691	44.9873	3.25985e-07	0.000142297
ENSBTAG00000010758	-4.00313	3.69017	20.8028	9.78937e-05	0.0167848									ENSBTAG00000006823	3.73882	5.98082	33.3115	3.78792e-06	0.00114323		ENSBTAG00000002574	4.86741	7.16387	36.345	1.9158e-06	0.00088927		ENSBTAG00000038889	3.16174	2.89469	44.9087	3.30944e-07	0.000142297
ENSBTAG00000000102	3.09197	0.604356	20.38	0.000110963	0.016972									ENSBTAG00000045889	5.46097	3.8715	33.1303	3.94983e-06	0.00114323		ENSBTAG00000006194	-3.19525	4.28245	35.6451	2.23526e-06	0.00100111		ENSBTAG00000011720	5.64432	-0.269728	44.7928	3.38405e-07	0.000142297
ENSBTAG00000001058	-3.04406	5.55213	20.3743	0.000111149	0.016972									ENSBTAG00000001917	2.51558	2.87037	33.1291	3.95088e-06	0.00114323		ENSBTAG00000016768	5.4118	2.4175	35.5486	2.28361e-06	0.00100111		ENSBTAG00000045889	6.54318	3.8715	44.7256	3.42816e-07	0.000142297
ENSBTAG00000009153	-3.44181	3.25519	20.3511	0.000111921	0.016972									ENSBTAG00000018352	7.10038	4.63308	32.4962	4.57739e-06	0.00124552		ENSBTAG00000018707	5.26924	5.20175	34.892	2.64405e-06	0.00109812		ENSBTAG00000013117	4.88713	3.83428	44.5938	3.5164e-07	0.000142297
ENSBTAG00000003514	-3.14332	5.57205	20.0571	0.000122206	0.0172475									ENSBTAG00000012307	2.9652	5.66544	32.2498	4.84948e-06	0.0012972		ENSBTAG00000018747	2.34908	1.35955	34.573	2.81221e-06	0.00110956		ENSBTAG00000006733	7.90744	4.39469	46.5547	3.63353e-07	0.000142709
ENSBTAG00000026344	-3.42897	1.30849	19.8224	0.000131145	0.0172475									ENSBTAG00000011392	6.52063	6.83163	31.9057	5.25905e-06	0.00132273		ENSBTAG00000038462	5.46815	4.99633	34.4433	2.9253e-06	0.00112603		ENSBTAG00000011392	8.07983	6.83163	43.5707	4.29064e-07	0.00015069
ENSBTAG00000014885	-4.22953	6.44798	19.811	0.000131597	0.0172475									ENSBTAG00000013614	2.83519	4.92416	31.8886	5.28026e-06	0.00132273		ENSBTAG00000038889	2.72023	2.89469	34.2588	3.05011e-06	0.0011351		ENSBTAG00000014466	8.25033	-1.08123	44.9403	4.86586e-07	0.000163429
ENSBTAG00000045789	-4.09411	7.2395	19.8101	0.00013163	0.0172475									ENSBTAG00000008652	3.08035	6.27097	31.6381	5.60309e-06	0.00132273		ENSBTAG00000008842	2.91768	5.25345	34.1747	3.10893e-06	0.0011351		ENSBTAG00000000177	-3.73926	4.85558	42.9304	4.86705e-07	0.000163429
ENSBTAG00000044010	5.14555	-1.30243	19.622	0.000139336	0.0172475									ENSBTAG00000046155	2.27569	3.08536	31.5355	5.7414e-06	0.00132273		ENSBTAG00000002964	3.85707	3.97946	34.0966	3.16464e-06	0.0011351		ENSBTAG00000008866	2.56616	4.70539	42.6981	5.09626e-07	0.000163688
ENSBTAG00000046323	-2.94615	3.49357	19.5535	0.000142262	0.0172475									ENSBTAG00000008499	-3.98091	4.47857	31.5258	5.75473e-06	0.00132273		ENSBTAG00000001274	3.1127	2.79752	33.6857	3.47579e-06	0.00117588		ENSBTAG00000014831	2.35428	4.68888	42.6024	5.19406e-07	0.000163688
ENSBTAG00000045954	-4.23289	1.27849	19.5367	0.000142989	0.0172475									ENSBTAG00000031217	5.08826	9.11196	31.4729	5.8277e-06	0.00132273		ENSBTAG00000007090	7.31481	6.40816	33.5613	3.57635e-06	0.00117588		ENSBTAG00000007741	-3.90756	4.09426	42.4133	5.39335e-07	0.000163688
ENSBTAG00000036417	-3.15571	-0.219249	19.4583	0.000146438	0.0172475									ENSBTAG00000006434	2.74758	8.7983	31.4517	5.85716e-06	0.00132273		ENSBTAG00000038849	5.88981	4.21308	33.4627	3.65832e-06	0.00117828		ENSBTAG00000002964	4.37096	3.97946	42.0652	5.78188e-07	0.000168981
ENSBTAG00000012555	2.05635	4.1604	19.1882	0.000159018	0.0172475									ENSBTAG00000047166	2.0648	1.71903	30.9163	6.61244e-06	0.00140458		ENSBTAG00000014003	3.15545	4.81264	33.3006	3.79752e-06	0.00119865		ENSBTAG00000017282	4.41854	0.590658	41.6876	6.23748e-07	0.000172827
ENSBTAG00000040103	-4.78549	-1.6668	19.1137	0.000162691	0.0172475									ENSBTAG00000015387	2.96899	2.72953	30.9311	6.63437e-06	0.00140458		ENSBTAG00000014719	2.32317	6.82849	33.1452	3.93621e-06	0.00120904		ENSBTAG00000018707	5.90758	5.20175	41.6633	6.26821e-07	0.000172827
ENSBTAG00000006161	2.13659	7.15844	19.106	0.000163079	0.0172475									ENSBTAG00000018947	-4.0939	1.78854	30.6281	7.13719e-06	0.00148209		ENSBTAG00000008661	4.81843	0.261654	33.0934	3.98365e-06	0.00120904		ENSBTAG00000019669	4.93106	0.928657	41.5132	6.46089e-07	0.000172827
ENSBTAG00000043953	-4.42967	0.732221	19.0955	0.000163604	0.0172475									ENSBTAG00000002964	3.6128	3.97946	30.4729	7.41052e-06	0.00148333		ENSBTAG00000020679	3.5418	1.53922	32.7143	4.35027e-06	0.00127141		ENSBTAG00000015450	2.21297	3.54699	41.3013	6.74396e-07	0.000174481
ENSBTAG00000047436	-3.0743	0.162858	19.0182	0.000167536	0.0172475									ENSBTAG00000012888	5.23733	0.989442	30.1666	7.98353e-06	0.00155429		ENSBTAG00000017743	6.73438	6.9088	32.278	4.81756e-06	0.00134842		ENSBTAG00000044027	4.72034	3.46631	40.9899	7.18429e-07	0.000180031
ENSBTAG00000002036	-2.05817	6.01908	18.9407	0.000171576	0.0173394									ENSBTAG00000006733	6.18202	4.39469	31.0782	8.30856e-06	0.00155429		ENSBTAG00000017719	3.67378	5.51824	32.2318	4.8701e-06	0.00134842		ENSBTAG00000009150	2.68905	6.47758	40.8746	7.35513e-07	0.000180031
ENSBTAG00000021427	-2.16494	2.60798	18.832	0.000177428	0.0173963									ENSBTAG00000018707	4.79535	5.20175	29.9969	8.32141e-06	0.00155429		ENSBTAG00000001717	-2.99295	4.54994	32.1175	5.00281e-06	0.00136128		ENSBTAG00000000238	4.95594	3.26207	40.258	8.3458e-07	0.000199566
ENSBTAG00000021916	-4.48783	7.23367	18.791	0.00017969	0.0175053									ENSBTAG00000011044	-3.33143	5.39833	29.9819	8.35186e-06	0.00155429		ENSBTAG00000000238	4.29252	3.26207	31.75	5.45646e-06	0.00145956		ENSBTAG00000001274	3.43113	2.79752	40.0225	8.76136e-07	0.000206376
ENSBTAG00000047231	-4.81136	6.50686	18.5908	0.000191188	0.017854									ENSBTAG00000040279	5.4609	2.25246	30.8344	8.78901e-06	0.00155429		ENSBTAG00000007210	4.81936	3.80676	31.2479	6.14903e-06	0.0016174		ENSBTAG00000008842	3.17765	5.25345	39.7113	9.34475e-07	0.000210684
ENSBTAG00000002898	-4.39243	5.84168	18.4835	0.000197671	0.0181183									ENSBTAG00000022699	2.83412	6.79287	29.7065	8.93561e-06	0.00155429		ENSBTAG00000047326	5.79354	0.11323	33.1637	7.06799e-06	0.00172424		ENSBTAG00000004079	4.1255	9.11776	39.3285	1.01203e-06	0.000221832
ENSBTAG00000013550	-2.21064	0.920807	18.3662	0.000205033	0.0181183									ENSBTAG00000016061	8.43657	0.802131	29.4701	9.4716e-06	0.00157348		ENSBTAG00000021189	5.66654	2.92629	30.5857	7.21075e-06	0.00172424		ENSBTAG00000007210	5.53459	3.80676	39.0718	1.06789e-06	0.000227748
ENSBTAG00000046295	-2.00441	0.985112	18.3045	0.000209028	0.0181183									ENSBTAG00000007783	-3.31803	6.23383	29.3563	9.74184e-06	0.00160152		ENSBTAG00000040279	5.51825	2.25246	31.3599	7.78859e-06	0.00178144		ENSBTAG00000002574	5.08176	7.16387	38.8405	1.12107e-06	0.000233513
ENSBTAG00000001187	-2.92163	-1.93108	18.2155	0.000213797	0.0181183									ENSBTAG00000011416	-3.3908	3.446	29.1937	1.01426e-05	0.0016502		ENSBTAG00000003741	2.82662	3.40603	30.1459	8.02388e-06	0.00180904		ENSBTAG00000014719	2.53011	6.82849	38.7127	1.15166e-06	0.000233513
ENSBTAG00000000476	-2.1262	2.77416	18.2192	0.000214682	0.0181183									ENSBTAG00000020685	-2.42021	6.22312	28.9306	1.08291e-05	0.00169643		ENSBTAG00000007767	2.58278	5.49054	29.9893	8.33673e-06	0.00185074		ENSBTAG00000003741	3.24745	3.40603	38.642	1.16898e-06	0.000233513
ENSBTAG00000045943	-3.88243	8.32658	18.1828	0.000217152	0.0181228									ENSBTAG00000009714	-2.27236	2.56944	28.7002	1.14713e-05	0.0017749		ENSBTAG00000011944	4.46831	1.63741	29.9374	8.44337e-06	0.00185074		ENSBTAG00000013614	3.15849	4.92416	38.5828	1.18369e-06	0.000233513
ENSBTAG00000000310	-2.64011	6.61943	18.1011	0.00022279	0.0181228									ENSBTAG00000007210	4.54555	3.80676	28.3562	1.25074e-05	0.00191642		ENSBTAG00000010175	3.28133	4.25117	29.5575	9.26956e-06	0.00193796		ENSBTAG00000040496	-2.15752	3.57133	38.2873	1.26014e-06	0.000245525
ENSBTAG00000031768	2.70719	-1.15586	18.0644	0.000224201	0.0181228									ENSBTAG00000046332	4.38502	11.1183	28.2437	1.28678e-05	0.00195269		ENSBTAG00000020685	-2.44985	6.22312	29.5234	9.34792e-06	0.00193796		ENSBTAG00000047326	6.46745	0.11323	41.4933	1.37771e-06	0.000252827
ENSBTAG00000018946	-2.4978	1.96959	18.0705	0.000224945	0.0181228									ENSBTAG00000015101	-2.4954	5.35523	28.0275	1.35919e-05	0.00198036		ENSBTAG00000008248	2.18166	4.21025	29.4694	9.47327e-06	0.00193796		ENSBTAG00000014003	3.37433	4.81264	37.4353	1.51191e-06	0.000267325
ENSBTAG00000013909	-2.39856	4.93768	17.8216	0.000243321	0.0186454									ENSBTAG00000012163	2.36874	1.6434	27.9331	1.39219e-05	0.00198036		ENSBTAG00000020701	5.32698	6.47119	29.3919	9.65653e-06	0.00193796		ENSBTAG00000010284	5.24347	0.0561774	37.3566	1.53774e-06	0.000267325
ENSBTAG00000004782	-2.04737	2.72898	17.7501	0.000248894	0.0186454									ENSBTAG00000018747	2.09594	1.35955	27.8039	1.42752e-05	0.00198036		ENSBTAG00000019669	4.05423	0.928657	29.3804	9.68396e-06	0.00193796		ENSBTAG00000038849	6.31056	4.21308	37.3205	1.54976e-06	0.000267325
ENSBTAG00000045822	-2.15122	6.38356	17.7314	0.000250371	0.0186454									ENSBTAG00000001303	2.7948	10.0407	27.7846	1.44585e-05	0.00198036		ENSBTAG00000016357	7.38492	-0.771345	30.4089	9.70086e-06	0.00193796		ENSBTAG00000006194	-3.27239	4.28245	37.1724	1.6001e-06	0.000267325
ENSBTAG00000003786	-4.27837	-0.151605	17.6845	0.000254126	0.0186454									ENSBTAG00000008483	2.05213	4.2142	27.5247	1.54518e-05	0.00204925		ENSBTAG00000014466	7.09746	-1.08123	30.3189	9.90665e-06	0.00194239		ENSBTAG00000001717	-3.26165	4.54994	37.1546	1.6063e-06	0.000267325
ENSBTAG00000047448	-2.19164	2.05966	17.5572	0.000264624	0.0188122									ENSBTAG00000013763	2.02223	1.30368	27.2899	1.62936e-05	0.00209062		ENSBTAG00000011720	4.54116	-0.269728	29.2424	1.00208e-05	0.00194239		ENSBTAG00000008497	4.54225	2.16018	37.0521	1.64231e-06	0.000268421
ENSBTAG00000014693	-2.43504	0.998896	17.4427	0.000274466	0.0191665									ENSBTAG00000016170	4.56583	3.34475	27.2133	1.67393e-05	0.00213048		ENSBTAG00000016125	6.07826	0.318085	30.2394	1.00922e-05	0.00194239		ENSBTAG00000011651	2.63623	1.84588	37.0206	1.65356e-06	0.000268421
ENSBTAG00000015164	-2.01577	0.0148676	16.9771	0.000317226	0.0205308									ENSBTAG00000002151	5.66463	1.33465	28.0724	1.69263e-05	0.00213704		ENSBTAG00000018513	3.02966	8.86571	28.9483	1.07814e-05	0.00205002		ENSBTAG00000011548	6.89625	5.9469	36.9838	1.66679e-06	0.000268421
ENSBTAG00000017701	-2.24609	2.18015	16.7852	0.000339207	0.0213281									ENSBTAG00000031242	-2.07002	3.11466	26.9114	1.80984e-05	0.00221417		ENSBTAG00000013124	4.23947	2.21162	28.8412	1.10736e-05	0.00208051		ENSBTAG00000024947	-4.41036	2.63695	36.9238	1.68865e-06	0.000269195
ENSBTAG00000048267	-3.44189	2.41167	16.256	0.000403274	0.0224893									ENSBTAG00000009707	6.3552	8.66243	26.8134	1.85648e-05	0.00221962		ENSBTAG00000009702	6.80642	8.68963	28.6326	1.16671e-05	0.00209718		ENSBTAG00000021189	6.35789	2.92629	36.8022	1.73383e-06	0.000273633
ENSBTAG00000012514	-3.0234	7.9684	16.1684	0.000415096	0.0227278									ENSBTAG00000008920	5.7671	5.46051	26.7748	1.8752e-05	0.00222514		ENSBTAG00000016170	4.70271	3.34475	28.5647	1.18678e-05	0.00209718		ENSBTAG00000007767	2.88147	5.49054	36.4969	1.85316e-06	0.000284073
ENSBTAG00000011803	-4.80657	11.7072	16.0932	0.000425524	0.0229987									ENSBTAG00000008353	2.31911	9.1639	26.5847	1.97045e-05	0.00222841		ENSBTAG00000001603	2.35729	1.02882	28.5336	1.19238e-05	0.00209718		ENSBTAG00000013078	-2.04802	5.58358	36.3692	1.90566e-06	0.00028643
ENSBTAG00000045757	-4.56176	8.18483	16.0588	0.0004304	0.0231327									ENSBTAG00000001717	-2.67391	4.54994	26.5667	1.9797e-05	0.00222841		ENSBTAG00000006338	2.5146	2.57155	28.5077	1.20392e-05	0.00209718		ENSBTAG00000018975	5.85376	0.466765	36.1634	1.99367e-06	0.000294058
ENSBTAG00000021218	-4.89031	10.0809	16.055	0.000430935	0.0231327									ENSBTAG00000023806	4.1638	5.60202	26.5236	2.00211e-05	0.00222841		ENSBTAG00000020141	4.75752	1.52685	28.4708	1.21513e-05	0.00209718		ENSBTAG00000008150	2.70191	4.91105	35.9716	2.07961e-06	0.00030032
ENSBTAG00000001303	-2.06382	10.0407	15.9993	0.000438956	0.0234041									ENSBTAG00000002981	-4.27613	4.70325	26.5208	2.00361e-05	0.00222841		ENSBTAG00000012888	5.07636	0.989442	28.4365	1.22569e-05	0.00209718		ENSBTAG00000027080	3.60194	4.62313	35.9715	2.07968e-06	0.00030032
ENSBTAG00000006572	-3.3266	0.323774	15.9135	0.000451632	0.0236174									ENSBTAG00000004940	-2.29903	-0.771403	26.4583	2.01921e-05	0.00222841		ENSBTAG00000012919	2.35767	4.98581	28.1915	1.30386e-05	0.00212614		ENSBTAG00000003403	5.19185	1.39057	35.9421	2.09322e-06	0.00030032
ENSBTAG00000026813	-2.79183	1.32215	15.8767	0.000457191	0.0238132									ENSBTAG00000016746	-4.62309	5.5634	26.4639	2.03364e-05	0.00222841		ENSBTAG00000001471	-2.02996	4.28562	28.1744	1.30953e-05	0.00212614		ENSBTAG00000016125	6.74851	0.318085	37.2639	2.16068e-06	0.000300394
ENSBTAG00000006030	-4.00139	8.84094	15.6845	0.000487444	0.0243475									ENSBTAG00000030932	2.57787	1.96459	26.441	2.04583e-05	0.00222841		ENSBTAG00000006686	3.81599	0.823719	27.8167	1.43407e-05	0.00226325		ENSBTAG00000013290	2.41232	6.96015	35.7792	2.16987e-06	0.000300394
ENSBTAG00000021522	-2.33314	-0.874362	15.6595	0.000489433	0.0243475									ENSBTAG00000018204	6.27818	5.26335	27.286	2.05328e-05	0.00222841		ENSBTAG00000008763	7.54637	5.25338	28.5526	1.50652e-05	0.00228962		ENSBTAG00000017719	3.89864	5.51824	35.6207	2.24739e-06	0.000306247
ENSBTAG00000039059	-2.44051	0.897251	15.6464	0.00049368	0.0243477									ENSBTAG00000018216	-3.40898	2.99466	26.36	2.08976e-05	0.00222841		ENSBTAG00000009150	2.16803	6.47758	27.6175	1.50886e-05	0.00228962		ENSBTAG00000020685	-2.71695	6.22312	35.5183	2.29901e-06	0.000307483
ENSBTAG00000022158	-4.21715	7.97655	15.5449	0.000510751	0.0245793									ENSBTAG00000002157	6.01466	5.48895	26.2798	2.1342e-05	0.00223907		ENSBTAG00000006185	-3.67845	5.24327	27.6147	1.50995e-05	0.00228962		ENSBTAG00000039509	-3.49934	1.59039	35.3866	2.36733e-06	0.000310305
ENSBTAG00000001100	-4.82996	-0.659997	15.4309	0.000530702	0.0245793									ENSBTAG00000000440	3.53159	6.37123	26.2371	2.15823e-05	0.00223907		ENSBTAG00000044027	3.72303	3.46631	27.4743	1.56525e-05	0.00233045		ENSBTAG00000009371	3.1426	0.200836	35.3239	2.39145e-06	0.000310305
ENSBTAG00000016043	-2.08558	2.23607	15.347	0.000545897	0.0245793									ENSBTAG00000015204	6.42953	6.5993	26.1916	2.18425e-05	0.00223907		ENSBTAG00000001604	6.64309	3.44467	27.3978	1.59631e-05	0.00235448		ENSBTAG00000016768	5.39096	2.4175	35.3205	2.40248e-06	0.000310305
ENSBTAG00000030182	-2.78686	1.85615	15.0714	0.000599269	0.0252879									ENSBTAG00000033190	2.10454	5.38425	26.1305	2.21965e-05	0.00224554		ENSBTAG00000000177	-2.84701	4.85558	27.2962	1.63856e-05	0.00237245		ENSBTAG00000009314	2.54494	0.723734	35.1838	2.45124e-06	0.000310961
ENSBTAG00000006999	-3.59229	7.62222	15.0515	0.000603332	0.0253914									ENSBTAG00000000580	3.42777	-0.0314863	26.0679	2.25656e-05	0.00226835		ENSBTAG00000008499	-3.64105	4.47857	27.2125	1.67427e-05	0.00240213		ENSBTAG00000048125	4.71677	1.27285	35.209	2.46294e-06	0.000310961
ENSBTAG00000017104	-2.66916	0.926541	14.9474	0.00062508	0.0257558									ENSBTAG00000019977	2.07401	1.41466	25.9861	2.29719e-05	0.00228015		ENSBTAG00000009707	6.39125	8.66243	27.03	1.7551e-05	0.00247312		ENSBTAG00000026199	-2.22361	11.7878	35.0032	2.57893e-06	0.000317974
ENSBTAG00000013242	-3.87644	6.94619	14.8865	0.000638214	0.0259512									ENSBTAG00000033961	2.38318	4.21928	25.8778	2.3728e-05	0.00232594		ENSBTAG00000046744	-4.06653	0.493523	26.589	1.96819e-05	0.0026685		ENSBTAG00000016343	2.16705	2.99373	34.9268	2.62351e-06	0.000320963
ENSBTAG00000022147	-2.38211	4.03554	14.744	0.000670069	0.0264274									ENSBTAG00000007767	2.37888	5.49054	25.823	2.40748e-05	0.00232651		ENSBTAG00000002756	-3.75756	4.79564	26.5694	1.97829e-05	0.0026685		ENSBTAG00000002724	3.08498	-0.875255	34.7392	2.70412e-06	0.000328281
ENSBTAG00000045711	-2.23346	-0.499946	14.7268	0.00067316	0.0264274									ENSBTAG00000010276	-3.20505	3.34853	25.7991	2.42279e-05	0.00232651		ENSBTAG00000014465	-3.16735	9.51742	26.5233	2.0023e-05	0.00267323		ENSBTAG00000038523	2.16474	2.1766	34.5678	2.83311e-06	0.000336181
ENSBTAG00000038141	-2.6909	5.07383	14.7163	0.000676482	0.0264919									ENSBTAG00000021708	-3.29287	4.57795	25.7843	2.43236e-05	0.00232651		ENSBTAG00000008150	2.28125	4.91105	26.4272	2.05324e-05	0.00268991		ENSBTAG00000001603	2.59662	1.02882	34.311	3.00261e-06	0.000351064
ENSBTAG00000018358	-2.68712	6.11834	14.6771	0.000685636	0.0265717									ENSBTAG00000015280	-4.01361	4.68833	25.3987	2.69536e-05	0.00248761		ENSBTAG00000018947	-3.73284	1.78854	26.3618	2.08876e-05	0.00268991		ENSBTAG00000038462	5.45457	4.99633	34.3094	3.01535e-06	0.000351064
ENSBTAG00000046420	-2.17283	-0.240416	14.6355	0.000694592	0.0265717									ENSBTAG00000000585	3.37092	-0.366518	25.3055	2.76335e-05	0.00252088		ENSBTAG00000007444	3.89207	5.22814	26.3252	2.10892e-05	0.00268991		ENSBTAG00000044126	2.6384	5.60432	34.1311	3.13987e-06	0.000361704
ENSBTAG00000005163	-3.24804	6.6428	14.6273	0.000697457	0.0265717									ENSBTAG00000038889	2.30367	2.89469	25.2029	2.84041e-05	0.00257628		ENSBTAG00000015204	6.43941	6.5993	26.2494	2.15128e-05	0.00268991		ENSBTAG00000037921	5.59722	0.155784	35.4035	3.19099e-06	0.000364929
ENSBTAG00000021378	-2.02982	6.33964	14.6151	0.0007004	0.0265717									ENSBTAG00000019276	-4.20514	5.72649	24.9474	3.0426e-05	0.0027129		ENSBTAG00000002749	4.24524	-1.00483	27.0534	2.1753e-05	0.00268991		ENSBTAG00000038770	-2.84557	1.79973	33.9886	3.24337e-06	0.000366323
ENSBTAG00000020080	-3.93195	4.10195	14.4806	0.000733609	0.0272419									ENSBTAG00000014326	-3.77726	4.64397	24.8789	3.09936e-05	0.00271293		ENSBTAG00000016514	2.57385	6.64725	26.2062	2.17587e-05	0.00268991		ENSBTAG00000001471	-2.24549	4.28562	33.8809	3.32406e-06	0.000366323
ENSBTAG00000017948	2.45226	0.0633726	14.3805	0.000759437	0.0275834									ENSBTAG00000009355	2.84413	5.41888	24.8646	3.1114e-05	0.00271293		ENSBTAG00000046574	3.28335	4.47408	26.1852	2.1879e-05	0.00268991		ENSBTAG00000013918	3.92529	1.64749	33.777	3.40394e-06	0.000366323
ENSBTAG00000010444	-3.50565	6.02717	14.3773	0.000760283	0.0275834									ENSBTAG00000038849	4.91101	4.21308	24.775	3.1877e-05	0.00274909		ENSBTAG00000046333	5.31798	3.02108	26.1665	2.1987e-05	0.00268991		ENSBTAG00000012900	2.80406	1.07665	33.7504	3.42468e-06	0.000366323
ENSBTAG00000015635	-2.8451	0.328107	14.2932	0.000782763	0.0280126									ENSBTAG00000021272	4.79448	3.64596	24.731	3.2259e-05	0.00275481		ENSBTAG00000013614	2.53783	4.92416	26.1006	2.23722e-05	0.00271598		ENSBTAG00000008248	2.34579	4.21025	33.7221	3.44692e-06	0.000366323
ENSBTAG00000033690	2.53199	2.31386	14.2699	0.000789128	0.0280561									ENSBTAG00000016514	2.48545	6.64725	24.6053	3.3378e-05	0.00278715		ENSBTAG00000013798	-4.49734	0.0669412	25.877	2.37333e-05	0.00281355		ENSBTAG00000017743	6.93315	6.9088	33.656	3.49956e-06	0.000366323
ENSBTAG00000010138	-2.33472	4.04391	14.2533	0.000793691	0.0280853									ENSBTAG00000008868	4.53951	5.39791	24.4469	3.48481e-05	0.00284909		ENSBTAG00000008497	3.67437	2.16018	25.7838	2.43266e-05	0.00281355		ENSBTAG00000012888	5.55794	0.989442	33.5742	3.56583e-06	0.000366323
ENSBTAG00000013079	-2.47281	-0.358003	14.2207	0.000800057	0.0281584									ENSBTAG00000017329	-2.09577	3.73666	24.4422	3.48932e-05	0.00284909		ENSBTAG00000009371	2.66761	0.200836	25.7725	2.43352e-05	0.00281355		ENSBTAG00000005333	7.63528	7.87878	33.5663	3.57232e-06	0.000366323
ENSBTAG00000021508	-4.28945	7.29521	14.1637	0.000818797	0.0282951									ENSBTAG00000019585	3.7487	6.35759	24.4286	3.50224e-05	0.00284909		ENSBTAG00000002092	6.4229	7.01445	25.7688	2.44238e-05	0.00281355		ENSBTAG00000017060	5.02169	0.732597	33.5543	3.58217e-06	0.000366323
ENSBTAG00000011713	-3.73856	-1.04089	14.1401	0.000825255	0.0283751									ENSBTAG00000047322	-4.00684	4.2611	24.368	3.56062e-05	0.00288053		ENSBTAG00000017282	3.40701	0.590658	25.6987	2.48822e-05	0.00284558		ENSBTAG00000002092	7.71181	7.01445	33.3514	3.75325e-06	0.00037254
ENSBTAG00000011500	-4.38999	8.51407	14.1313	0.000828089	0.0283853									ENSBTAG00000011733	4.89346	-0.390922	24.3508	3.57739e-05	0.00288053		ENSBTAG00000005333	6.2933	7.87878	25.618	2.54219e-05	0.00288639		ENSBTAG00000018947	-4.38075	1.78854	33.2834	3.81254e-06	0.00037397
ENSBTAG00000018267	-4.76663	5.43047	14.1276	0.00082915	0.0283853									ENSBTAG00000005010	-3.21616	2.89162	24.3007	3.62673e-05	0.00289076		ENSBTAG00000020620	4.98705	-0.790667	25.5713	2.57401e-05	0.00290164		ENSBTAG00000005078	-2.63436	6.40209	33.2742	3.82069e-06	0.00037397
ENSBTAG00000010578	-3.18345	2.68016	14.0325	0.000857134	0.0287815									ENSBTAG00000025161	2.11331	4.32	24.21	3.71788e-05	0.00292302		ENSBTAG00000024947	-3.42671	2.63695	25.5414	2.59458e-05	0.00290409		ENSBTAG00000005604	6.07589	1.75888	32.6477	4.41824e-06	0.000420052
ENSBTAG00000018016	-2.57573	6.80873	13.9929	0.000869086	0.0289734									ENSBTAG00000006541	5.26451	7.88715	24.1879	3.74041e-05	0.00292302		ENSBTAG00000044126	2.24849	5.60432	25.4818	2.63615e-05	0.0029184		ENSBTAG00000017032	5.47994	1.72325	32.6137	4.45352e-06	0.000420871
ENSBTAG00000037794	-4.67272	5.10803	14.2356	0.000878297	0.0289985									ENSBTAG00000006194	-2.53658	4.28245	24.1871	3.74128e-05	0.00292302		ENSBTAG00000012034	5.17957	-0.271186	26.2023	2.69315e-05	0.0029184		ENSBTAG00000020701	5.65195	6.47119	32.1427	4.97321e-06	0.000456321
ENSBTAG00000046118	2.46251	0.480269	13.8778	0.000904869	0.0293186									ENSBTAG00000048075	4.10431	3.15021	24.0637	3.87018e-05	0.00300319		ENSBTAG00000012097	3.29163	-0.0458248	25.3606	2.72294e-05	0.0029184		ENSBTAG00000004399	2.22305	3.9353	32.0315	5.10516e-06	0.000464756
ENSBTAG00000021999	2.06427	5.68857	13.8608	0.000910283	0.0293186									ENSBTAG00000046910	-3.93014	4.75843	24.0356	3.90008e-05	0.00300319		ENSBTAG00000018352	6.06259	4.63308	25.3416	2.73681e-05	0.0029184		ENSBTAG00000009702	7.37251	8.68963	31.9749	5.17372e-06	0.000464756
ENSBTAG00000046011	2.60373	0.445657	13.8313	0.000919756	0.0294446									ENSBTAG00000012925	-3.6808	4.1426	24.0348	3.90099e-05	0.00300319		ENSBTAG00000046838	4.17827	2.37789	25.2629	2.79509e-05	0.00296055		ENSBTAG00000008501	8.13569	-0.905563	38.9831	5.17464e-06	0.000464756
ENSBTAG00000018765	-3.20436	0.765093	13.8145	0.000925206	0.0294446									ENSBTAG00000011405	-2.85635	2.9671	23.9849	3.9549e-05	0.00302971		ENSBTAG00000015280	-3.99177	4.68833	24.9733	3.02143e-05	0.00316882		ENSBTAG00000011483	2.87449	4.39378	31.8475	5.33191e-06	0.00046749
ENSBTAG00000017690	-2.16919	4.55823	13.7428	0.000948865	0.0296953									ENSBTAG00000015470	4.21054	6.16924	23.9671	3.97433e-05	0.00302971		ENSBTAG00000031217	4.38158	9.11196	24.9605	3.03188e-05	0.00316882		ENSBTAG00000012307	2.93384	5.66544	31.6455	5.59337e-06	0.000487704
ENSBTAG00000018403	-3.41909	-0.113428	13.654	0.000979036	0.0301821									ENSBTAG00000014435	-3.49782	3.93879	23.9335	4.01128e-05	0.00302971		ENSBTAG00000012307	2.56674	5.66544	24.9137	3.07036e-05	0.00318792		ENSBTAG00000004899	4.26017	3.4624	31.5902	5.66733e-06	0.000491439
ENSBTAG00000021066	-2.63297	5.12912	13.6318	0.000986774	0.0301821									ENSBTAG00000031851	2.00842	1.38874	23.8837	4.05559e-05	0.00302971		ENSBTAG00000015470	4.29738	6.16924	24.7711	3.19103e-05	0.00329156		ENSBTAG00000015101	-2.66778	5.35523	31.5002	5.78992e-06	0.000497119
ENSBTAG00000001219	-4.67222	1.56561	13.6111	0.000994004	0.0301821									ENSBTAG00000006185	-3.3595	5.24327	23.8822	4.06841e-05	0.00302971		ENSBTAG00000008966	2.57746	4.72924	24.5517	3.38683e-05	0.00335191		ENSBTAG00000030227	2.28809	2.83094	31.4731	5.82733e-06	0.000497119
ENSBTAG00000014407	2.01139	1.8507	13.606	0.0009958	0.0301821									ENSBTAG00000013573	-3.04179	5.78505	23.8787	4.07232e-05	0.00302971		ENSBTAG00000002981	-4.08631	4.70325	24.5439	3.39403e-05	0.00335191		ENSBTAG00000001675	-2.87222	0.00384025	31.3917	5.87913e-06	0.000498841
ENSBTAG00000048049	-4.92558	1.71912	13.5596	0.00101228	0.0304715									ENSBTAG00000017896	2.78041	3.68626	23.8701	4.08196e-05	0.00302971		ENSBTAG00000002036	2.32422	6.01908	24.5437	3.39421e-05	0.00335191		ENSBTAG00000020989	2.80426	1.5175	31.305	6.06571e-06	0.000502742
ENSBTAG00000031346	-4.62162	1.09018	13.4522	0.00105158	0.0310383									ENSBTAG00000014143	2.24843	8.06367	23.8639	4.08902e-05	0.00302971		ENSBTAG00000002157	5.75154	5.48895	24.5408	3.39688e-05	0.00335191		ENSBTAG00000008661	4.67447	0.261654	31.2495	6.14676e-06	0.000502742
ENSBTAG00000006792	2.06115	4.58583	13.4184	0.00106429	0.0310824									ENSBTAG00000005269	-3.86636	3.89434	23.8106	4.1496e-05	0.0030319		ENSBTAG00000021272	4.76776	3.64596	24.4968	3.43777e-05	0.00335191		ENSBTAG00000013420	2.92123	2.13172	31.24	6.16069e-06	0.000502742
ENSBTAG00000006541	-3.91128	7.88715	13.3918	0.00107443	0.0311704									ENSBTAG00000001604	6.09334	3.44467	23.7314	4.24139e-05	0.00307053		ENSBTAG00000021992	2.23335	7.00683	24.4937	3.44069e-05	0.00335191		ENSBTAG00000006338	2.64062	2.57155	31.2185	6.19248e-06	0.000502742
ENSBTAG00000010030	2.16673	3.69253	13.3831	0.00107775	0.031198									ENSBTAG00000018167	3.81985	4.70523	23.6562	4.33063e-05	0.00307409		ENSBTAG00000047462	-2.39526	6.1447	24.401	3.5287e-05	0.00339846		ENSBTAG00000006185	-3.9648	5.24327	31.1559	6.28598e-06	0.000502742
ENSBTAG00000012623	-2.60351	1.89767	13.2968	0.00111143	0.0314258									ENSBTAG00000008763	6.80737	5.25338	24.3614	4.3307e-05	0.00307409		ENSBTAG00000032340	-2.28621	4.03874	24.3583	3.57014e-05	0.00339846		ENSBTAG00000012653	5.97782	3.72685	31.1547	6.2877e-06	0.000502742
ENSBTAG00000009387	-4.04514	8.23421	13.2388	0.00113469	0.0316951									ENSBTAG00000009576	2.20089	6.74747	23.6539	4.33344e-05	0.00307409		ENSBTAG00000008501	7.22541	-0.905563	28.5746	3.59614e-05	0.00339846		ENSBTAG00000021855	4.4566	0.0266897	31.0669	6.42139e-06	0.000506631
ENSBTAG00000027868	-2.15587	3.63108	13.2102	0.00114635	0.031903									ENSBTAG00000021609	5.03876	-1.75285	23.6312	4.36074e-05	0.00307409		ENSBTAG00000013492	5.29953	4.37906	24.2428	3.68468e-05	0.00343618		ENSBTAG00000046333	5.90387	3.02108	31.0468	6.45247e-06	0.000506631
ENSBTAG00000016142	-2.61063	3.13445	13.1926	0.0011536	0.031903									ENSBTAG00000007741	-2.74499	4.09426	23.5961	4.40347e-05	0.00307903		ENSBTAG00000015101	-2.30341	5.35523	24.2073	3.72059e-05	0.00343618		ENSBTAG00000006864	6.78538	6.02834	30.9661	6.57872e-06	0.000513987
ENSBTAG00000007547	-4.71394	5.04941	13.1564	0.00116863	0.0319088									ENSBTAG00000043951	3.41651	3.05167	23.5914	4.40921e-05	0.00307903		ENSBTAG00000011182	-2.46086	3.97842	24.1862	3.74224e-05	0.00343618		ENSBTAG00000013124	4.41692	2.21162	30.9122	6.66459e-06	0.000518131
ENSBTAG00000013929	-3.64693	5.87949	13.1195	0.00118422	0.0321675									ENSBTAG00000001631	-2.99079	5.50575	23.5603	4.44747e-05	0.00308091		ENSBTAG00000016800	2.02262	4.65452	24.1082	3.82308e-05	0.00347577		ENSBTAG00000016514	2.81676	6.64725	30.7932	6.85827e-06	0.000527783
ENSBTAG00000003369	-3.55515	1.90296	12.9925	0.00123948	0.03283									ENSBTAG00000026971	-3.73136	4.03092	23.5438	4.46783e-05	0.00308091		ENSBTAG00000008920	5.37943	5.46051	24.026	3.91041e-05	0.00352652		ENSBTAG00000001604	7.13594	3.44467	30.7471	6.935e-06	0.000527783
ENSBTAG00000033008	-3.15777	8.31405	12.9852	0.00124277	0.03283									ENSBTAG00000015743	2.45077	5.04082	23.5106	4.50926e-05	0.00308091		ENSBTAG00000013573	-3.05059	5.78505	23.9178	4.02867e-05	0.00359212		ENSBTAG00000016800	2.30018	4.65452	30.6379	7.12031e-06	0.0005341
ENSBTAG00000007694	-2.49531	0.688521	12.9643	0.00125215	0.0328809									ENSBTAG00000023216	3.44804	1.03241	23.4022	4.64735e-05	0.00310782		ENSBTAG00000021855	3.87479	0.0266897	23.78	4.1848e-05	0.00363852		ENSBTAG00000019567	-2.09532	1.58383	30.3635	7.54405e-06	0.000553769
ENSBTAG00000014699	2.0131	0.672915	12.8201	0.00131908	0.034016									ENSBTAG00000011944	3.89633	1.63741	23.3587	4.7041e-05	0.00311933		ENSBTAG00000005288	3.99057	6.74258	23.7793	4.18568e-05	0.00363852		ENSBTAG00000004869	4.4456	1.33338	30.1946	7.92928e-06	0.000576682
ENSBTAG00000019900	2.70559	3.93293	12.7935	0.00133181	0.0342324									ENSBTAG00000010077	-3.51284	4.16211	23.3334	4.73741e-05	0.00312828		ENSBTAG00000023806	3.89665	5.60202	23.7704	4.19599e-05	0.00363852		ENSBTAG00000007791	3.07314	1.23485	30.0191	8.2763e-06	0.000593712
ENSBTAG00000006563	-3.0562	6.00494	12.7644	0.00134593	0.0343969									ENSBTAG00000007247	-2.92455	3.97682	23.2525	4.8456e-05	0.00313807		ENSBTAG00000000345	-2.48624	3.13021	23.6856	4.29561e-05	0.00368267		ENSBTAG00000046574	3.55098	4.47408	29.9909	8.33361e-06	0.000595118
ENSBTAG00000014682	-2.78283	2.4027	12.563	0.00144815	0.0353564									ENSBTAG00000011635	-3.31009	2.48829	23.2413	4.8608e-05	0.00313807		ENSBTAG00000018146	-3.09766	0.390264	23.653	4.33447e-05	0.00368267		ENSBTAG00000007239	2.35445	3.70123	29.8651	8.59434e-06	0.000610972
ENSBTAG00000025448	-2.34943	-0.593044	12.5017	0.00148094	0.0354661									ENSBTAG00000024929	4.55448	3.75169	23.2399	4.86272e-05	0.00313807		ENSBTAG00000008436	-2.72036	5.09581	23.629	4.36351e-05	0.00368267		ENSBTAG00000032340	-2.55531	4.03874	29.7397	8.86287e-06	0.000625028
ENSBTAG00000009870	-2.00774	4.99492	12.472	0.00149709	0.0356367									ENSBTAG00000001120	2.56358	5.03086	23.2235	4.88507e-05	0.00313807		ENSBTAG00000006864	5.6366	6.02834	23.578	4.42565e-05	0.00368267		ENSBTAG00000002647	-2.1035	4.274	29.6679	9.02088e-06	0.000625028
ENSBTAG00000048210	-3.18185	4.25743	12.4581	0.00150472	0.0357104									ENSBTAG00000002036	2.25337	6.01908	23.1912	4.92937e-05	0.00313807		ENSBTAG00000024929	4.59322	3.75169	23.5637	4.44325e-05	0.00368267		ENSBTAG00000006601	2.39653	4.52222	29.49	9.4251e-06	0.00063567
ENSBTAG00000013163	-2.1205	5.93462	12.4046	0.00153446	0.0362278									ENSBTAG00000014124	2.21174	4.61212	23.1869	4.93536e-05	0.00313807		ENSBTAG00000025337	4.72413	4.24465	23.5499	4.46025e-05	0.00368267		ENSBTAG00000024340	4.63226	0.265297	29.4068	9.62093e-06	0.000637711
ENSBTAG00000017448	-2.13319	5.50212	12.3594	0.0015601	0.0365797									ENSBTAG00000047347	-3.57522	2.7753	23.1755	4.95108e-05	0.00313807		ENSBTAG00000008652	2.60519	6.27097	23.5024	4.5196e-05	0.00369577		ENSBTAG00000009707	6.78181	8.66243	29.3871	9.6679e-06	0.000637711
ENSBTAG00000000945	-2.02352	4.76044	12.2681	0.0016133	0.0370403									ENSBTAG00000017743	5.38475	6.9088	23.0814	5.08341e-05	0.00319627		ENSBTAG00000047491	3.34149	5.16773	23.3762	4.68118e-05	0.00376931		ENSBTAG00000012919	2.41063	4.98581	29.3651	9.72083e-06	0.000637711
ENSBTAG00000029989	-3.90394	-1.83112	12.1979	0.00165554	0.0375398									ENSBTAG00000021686	-3.21309	3.77113	22.9872	5.21959e-05	0.00325595		ENSBTAG00000031696	2.85905	3.83536	23.3024	4.77854e-05	0.00377905		ENSBTAG00000047462	-2.65528	6.1447	29.3578	9.73821e-06	0.000637711
ENSBTAG00000001176	-3.2795	7.58129	12.165	0.00167577	0.0378498									ENSBTAG00000037651	3.34993	6.2006	22.9071	5.33854e-05	0.00328498		ENSBTAG00000004899	3.56059	3.4624	23.255	4.84218e-05	0.00380195		ENSBTAG00000007131	3.0822	0.926643	29.2992	9.88054e-06	0.000642493
ENSBTAG00000014705	-5.78304	-0.171452	12.6193	0.0016837	0.0378953									ENSBTAG00000046512	2.71562	7.28709	22.8862	5.3702e-05	0.00328498		ENSBTAG00000019521	7.56421	0.913449	25.7465	4.92465e-05	0.00380985		ENSBTAG00000008849	2.3174	5.22528	29.2792	9.92971e-06	0.000642493
ENSBTAG00000014026	2.86276	2.68798	12.1401	0.00169122	0.0378953									ENSBTAG00000011672	4.21935	-0.689657	22.8131	5.48194e-05	0.00331479		ENSBTAG00000017060	4.06357	0.732597	23.053	5.12414e-05	0.00390672		ENSBTAG00000018249	3.25142	4.32595	29.234	1.00416e-05	0.000646841
ENSBTAG00000030518	-2.41161	0.176354	12.1234	0.00170168	0.0378953									ENSBTAG00000007799	-3.61913	3.49905	22.7532	5.57539e-05	0.0033482		ENSBTAG00000016746	-4.22893	5.5634	23.0059	5.19229e-05	0.00393965		ENSBTAG00000006686	3.91266	0.823719	29.1723	1.01966e-05	0.000654161
ENSBTAG00000029772	-3.94298	-2.01941	12.1129	0.00170832	0.0378953									ENSBTAG00000009696	5.1996	7.98845	22.7256	5.6191e-05	0.0033482		ENSBTAG00000019276	-4.00217	5.72649	22.9793	5.2312e-05	0.00395018		ENSBTAG00000040279	5.35966	2.25246	29.8615	1.10277e-05	0.00069063
ENSBTAG00000034885	-2.49584	3.98901	11.9679	0.00180257	0.0387959									ENSBTAG00000016768	4.18377	2.4175	22.7043	5.65302e-05	0.0033482		ENSBTAG00000016450	2.79683	1.22961	22.9295	5.30509e-05	0.0039869		ENSBTAG00000000345	-2.77594	3.13021	28.7693	1.12743e-05	0.000703286
ENSBTAG00000018170	-5.3766	1.86534	12.0514	0.00188405	0.039234									ENSBTAG00000007131	2.68935	0.926643	22.6983	5.66268e-05	0.0033482		ENSBTAG00000003276	2.56754	2.02297	22.8934	5.3592e-05	0.00400848		ENSBTAG00000024929	5.1737	3.75169	28.5958	1.17754e-05	0.000720307
ENSBTAG00000011076	-2.29649	1.81657	11.7707	0.00193987	0.0396568									ENSBTAG00000046574	3.02598	4.47408	22.6839	5.6857e-05	0.0033482		ENSBTAG00000009797	3.03566	0.860252	22.8558	5.41628e-05	0.00402273		ENSBTAG00000003276	2.89006	2.02297	28.4593	1.21865e-05	0.000741046
ENSBTAG00000016433	2.72761	-0.308349	11.6985	0.00199289	0.0399555									ENSBTAG00000018214	4.81359	5.84501	22.6304	5.77257e-05	0.00336403		ENSBTAG00000021508	5.09584	7.29521	22.8474	5.42923e-05	0.00402273		ENSBTAG00000040398	2.75932	4.5152	28.4522	1.22083e-05	0.000741046
ENSBTAG00000007146	2.71815	2.99015	11.6957	0.00199499	0.0399555									ENSBTAG00000046286	-2.58839	3.75125	22.6279	5.77654e-05	0.00336403		ENSBTAG00000011483	2.38616	4.39378	22.7258	5.61875e-05	0.00408641		ENSBTAG00000017812	3.97535	1.69718	28.4357	1.22591e-05	0.000741279
ENSBTAG00000001503	-3.00321	6.30043	11.6527	0.00202737	0.040348									ENSBTAG00000018164	3.33192	4.54933	22.5832	5.85027e-05	0.00339445		ENSBTAG00000018214	4.81154	5.84501	22.6129	5.80113e-05	0.00414905		ENSBTAG00000008763	7.65362	5.25338	29.1663	1.30022e-05	0.00076854
ENSBTAG00000012137	2.19534	4.17616	11.622	0.00205086	0.0406227									ENSBTAG00000000434	2.88564	9.35239	22.5442	5.91535e-05	0.0033958		ENSBTAG00000003692	-2.96981	5.1851	22.5974	5.82679e-05	0.00414905		ENSBTAG00000013451	3.51745	-1.54984	28.1332	1.31105e-05	0.000768619
ENSBTAG00000047868	2.07361	1.76984	11.5917	0.0020743	0.0406464									ENSBTAG00000004488	4.18929	4.15986	22.5387	5.92462e-05	0.0033958		ENSBTAG00000003403	3.97359	1.39057	22.5757	5.86262e-05	0.00414905		ENSBTAG00000007446	-2.78566	2.23687	28.1042	1.33302e-05	0.000772436
ENSBTAG00000000399	-2.10319	-0.841234	11.5804	0.00208182	0.0406464									ENSBTAG00000019772	2.68814	3.68351	22.5204	5.95538e-05	0.0033958		ENSBTAG00000018020	-2.30312	0.594301	22.4745	6.02456e-05	0.00417917		ENSBTAG00000020080	4.62022	4.10195	28.0704	1.34448e-05	0.000772436
ENSBTAG00000008739	-2.14555	3.61233	11.5709	0.00209056	0.0406464									ENSBTAG00000026375	-2.07096	3.7258	22.505	5.98149e-05	0.0033958		ENSBTAG00000017032	4.42694	1.72325	22.4766	6.02992e-05	0.00417917		ENSBTAG00000011101	2.40486	3.60691	28.0571	1.34904e-05	0.000772436
ENSBTAG00000005714	-2.12741	11.1095	11.5404	0.00211468	0.0406998									ENSBTAG00000001938	-2.99828	5.32775	22.4852	6.01524e-05	0.0033958		ENSBTAG00000037735	3.27542	0.658	22.4722	6.03758e-05	0.00417917		ENSBTAG00000019340	2.51555	1.49426	28.05	1.35146e-05	0.000772436
ENSBTAG00000004488	-3.58981	4.15986	11.5317	0.00212162	0.0407134									ENSBTAG00000013492	5.05812	4.37906	22.4838	6.0176e-05	0.0033958		ENSBTAG00000007239	2.01659	3.70123	22.3725	6.21131e-05	0.00422819		ENSBTAG00000001344	4.78336	0.429528	28.0402	1.35484e-05	0.000772436
ENSBTAG00000008916	2.06581	1.42224	11.5203	0.00213078	0.0407556									ENSBTAG00000014453	-2.60098	5.28077	22.4673	6.0459e-05	0.0033958		ENSBTAG00000013918	3.11929	1.64749	22.3704	6.21502e-05	0.00422819		ENSBTAG00000010598	2.48118	6.5356	28.0375	1.35575e-05	0.000772436
ENSBTAG00000043490	-2.19529	-0.688152	11.4893	0.00215332	0.040895									ENSBTAG00000017032	4.41116	1.72325	22.3641	6.22607e-05	0.00347027		ENSBTAG00000000044	5.813	1.20676	22.9497	6.31509e-05	0.0042496		ENSBTAG00000046838	4.43123	2.37789	27.9783	1.37627e-05	0.000781306
ENSBTAG00000000589	-2.82963	3.41173	11.4563	0.00218277	0.0410994									ENSBTAG00000033441	-4.12145	4.40998	22.3519	6.24787e-05	0.00347027		ENSBTAG00000005269	-3.72235	3.89434	22.2483	6.43529e-05	0.0042673		ENSBTAG00000016450	3.10872	1.22961	27.9083	1.40098e-05	0.000784054
ENSBTAG00000021601	2.59474	-1.09974	11.4262	0.00220765	0.0411432									ENSBTAG00000002756	-3.35749	4.79564	22.3356	6.27686e-05	0.00347027		ENSBTAG00000047322	-3.79118	4.2611	22.1956	6.53283e-05	0.00427806		ENSBTAG00000037735	3.68005	0.658	27.8678	1.41553e-05	0.000786615
ENSBTAG00000013921	-5.0491	8.24239	11.4097	0.00222149	0.0411981									ENSBTAG00000019658	2.47077	4.0133	22.329	6.28879e-05	0.00347027		ENSBTAG00000010284	3.99387	0.0561774	22.0472	6.81641e-05	0.00442702		ENSBTAG00000015204	6.70044	6.5993	27.8057	1.43809e-05	0.000796351
ENSBTAG00000004958	-3.68941	0.227586	11.3924	0.00223599	0.041297									ENSBTAG00000047807	-4.00792	1.41101	22.3071	6.32811e-05	0.00347418		ENSBTAG00000037921	4.43449	0.155784	22.6038	6.93907e-05	0.0044337		ENSBTAG00000014465	-3.25475	9.51742	27.7918	1.4432e-05	0.000796384
ENSBTAG00000017761	2.36936	5.60035	11.326	0.0022929	0.0418826									ENSBTAG00000002298	-3.1404	4.7431	22.2976	6.34528e-05	0.00347418		ENSBTAG00000011416	-2.86868	3.446	21.9468	7.01599e-05	0.00446477		ENSBTAG00000015470	4.60799	6.16924	27.703	1.47625e-05	0.000808967
ENSBTAG00000009570	-2.38597	-0.70864	11.3073	0.00230922	0.0420347									ENSBTAG00000044126	2.0916	5.60432	22.2884	6.36191e-05	0.00347418		ENSBTAG00000048172	-2.17295	6.2805	21.8579	7.19774e-05	0.00452568		ENSBTAG00000016170	4.61112	3.34475	27.6502	1.4963e-05	0.000817113
ENSBTAG00000015366	-2.40432	8.81657	11.2412	0.0023678	0.042365									ENSBTAG00000007237	-3.4944	5.23682	22.2712	6.39325e-05	0.00347925		ENSBTAG00000005604	4.8094	1.75888	21.8024	7.31377e-05	0.00458039		ENSBTAG00000018073	-2.0998	5.42521	27.5597	1.53136e-05	0.000832408
ENSBTAG00000004475	-2.46949	3.005	11.1441	0.00245684	0.043065									ENSBTAG00000012184	-3.93074	2.65433	22.2558	6.42142e-05	0.00348257		ENSBTAG00000017812	3.42005	1.69718	21.7699	7.38274e-05	0.00460531		ENSBTAG00000018513	2.9417	8.86571	27.4976	1.55595e-05	0.000832408
ENSBTAG00000021777	-2.11409	-0.628223	11.1196	0.00247987	0.0431322									ENSBTAG00000019777	-3.5318	4.5556	22.1941	6.53564e-05	0.00350835		ENSBTAG00000007783	-2.78923	6.23383	21.7454	7.43508e-05	0.0046197		ENSBTAG00000008966	2.74152	4.72924	27.4445	1.57728e-05	0.000836872
ENSBTAG00000033170	2.39781	3.76509	11.078	0.00251951	0.0432675									ENSBTAG00000009819	-4.16123	5.48027	22.174	6.57339e-05	0.0035113		ENSBTAG00000004770	3.8329	4.87711	21.7231	7.48306e-05	0.00463128		ENSBTAG00000009145	2.92602	1.40875	27.4433	1.57778e-05	0.000836872
ENSBTAG00000034613	-3.83248	-1.75376	11.0444	0.00255207	0.0435523									ENSBTAG00000016726	-3.88975	3.79447	22.1675	6.58563e-05	0.0035113		ENSBTAG00000018399	-2.70535	3.95689	21.6224	7.70421e-05	0.00467641		ENSBTAG00000030885	2.89345	3.15588	27.4373	1.5802e-05	0.000836872
ENSBTAG00000022020	-2.47121	1.4173	10.9848	0.00261087	0.0439282									ENSBTAG00000008216	-4.44817	7.04048	22.1216	6.67268e-05	0.00354573		ENSBTAG00000006541	4.88819	7.88715	21.6006	7.75314e-05	0.00467641		ENSBTAG00000002036	2.46698	6.01908	27.367	1.60899e-05	0.000841112
ENSBTAG00000031184	-2.45067	8.27368	10.9522	0.0026437	0.0442918									ENSBTAG00000008436	-2.60919	5.09581	22.0518	6.80757e-05	0.00360527		ENSBTAG00000010303	2.9798	3.82571	21.574	7.81299e-05	0.00467641		ENSBTAG00000047491	3.66229	5.16773	27.3386	1.6208e-05	0.000844208
ENSBTAG00000002356	2.78963	-1.50362	10.9395	0.00265653	0.0443654									ENSBTAG00000010721	-2.86567	6.00503	21.9771	6.95508e-05	0.00362688		ENSBTAG00000006907	3.73693	9.48275	21.5686	7.82527e-05	0.00467641		ENSBTAG00000019052	2.09916	6.3301	27.2855	1.64307e-05	0.000848785
ENSBTAG00000016096	-2.47579	-1.54283	10.9163	0.00267765	0.0444417									ENSBTAG00000009637	2.67189	5.63715	21.9171	7.07603e-05	0.00367348		ENSBTAG00000018216	-3.03058	2.99466	21.5567	7.85229e-05	0.00467641		ENSBTAG00000025337	5.16996	4.24465	27.2793	1.64572e-05	0.000848785
ENSBTAG00000019818	-2.71049	4.36224	10.8728	0.00272546	0.0446336									ENSBTAG00000027201	2.2975	4.27865	21.8973	7.11649e-05	0.00368238		ENSBTAG00000010598	2.14684	6.5356	21.5039	7.97364e-05	0.00471311		ENSBTAG00000019521	8.22636	0.913449	30.5119	1.71416e-05	0.000876266
ENSBTAG00000045767	-2.63756	-0.61782	10.8466	0.00275141	0.0447064									ENSBTAG00000000838	2.13142	4.1096	21.8287	7.25856e-05	0.00371931		ENSBTAG00000007131	2.61501	0.926643	21.4315	8.14311e-05	0.00476325		ENSBTAG00000008509	-2.32874	-0.5286	27.0686	1.72239e-05	0.000876266
ENSBTAG00000020707	2.22645	2.18613	10.842	0.00275792	0.0447064									ENSBTAG00000018249	2.75042	4.32595	21.7285	7.47137e-05	0.00381532		ENSBTAG00000021708	-2.95887	4.57795	21.4301	8.14642e-05	0.00476325		ENSBTAG00000021992	2.35955	7.00683	27.0929	1.72677e-05	0.000876266
ENSBTAG00000006037	-3.1071	3.95783	10.8164	0.0027852	0.0447617									ENSBTAG00000012406	4.07282	1.60998	21.7147	7.50142e-05	0.00381532		ENSBTAG00000000983	5.3025	2.06587	21.4051	8.20581e-05	0.00476325		ENSBTAG00000027201	2.57854	4.27865	27.0627	1.7403e-05	0.000880301
ENSBTAG00000009702	-4.1474	8.68963	10.7903	0.00281334	0.04479									ENSBTAG00000018571	-4.89329	5.23593	21.7064	7.51935e-05	0.00381532		ENSBTAG00000001631	-2.81961	5.50575	21.2107	8.68451e-05	0.00493018		ENSBTAG00000016057	-2.01778	8.37087	27.0413	1.74998e-05	0.000882369
ENSBTAG00000021823	-3.14137	4.16186	10.7873	0.00281657	0.04479									ENSBTAG00000006404	-2.41867	4.42732	21.6846	7.56682e-05	0.00381532		ENSBTAG00000022158	4.78917	7.97655	21.1377	8.87188e-05	0.0050185		ENSBTAG00000013492	5.66477	4.37906	26.9482	1.79267e-05	0.000885314
ENSBTAG00000000859	2.21818	4.46762	10.7658	0.00284	0.0448353									ENSBTAG00000005534	2.64079	7.07937	21.656	7.62983e-05	0.00383484		ENSBTAG00000009819	-4.04513	5.48027	21.1024	8.96411e-05	0.00504822		ENSBTAG00000021420	2.89517	-0.254414	26.9337	1.79487e-05	0.000885314
ENSBTAG00000001562	-2.98952	-1.1779	10.7543	0.00285258	0.044903									ENSBTAG00000002670	3.63856	4.68	21.6194	7.71095e-05	0.0038353		ENSBTAG00000011051	-2.03101	3.96291	21.0685	9.05362e-05	0.00506479		ENSBTAG00000017875	2.4424	-0.536785	26.9092	1.79509e-05	0.000885314
ENSBTAG00000011390	-3.25696	6.49934	10.723	0.00288722	0.0451639									ENSBTAG00000039462	-4.15518	4.81919	21.6107	7.73044e-05	0.0038353		ENSBTAG00000015368	2.45018	3.40006	20.9653	9.33197e-05	0.00514955		ENSBTAG00000014537	2.11556	0.503572	26.817	1.8386e-05	0.000898353
ENSBTAG00000007288	2.16308	2.69673	10.6758	0.00294031	0.0452721									ENSBTAG00000020227	-3.723	2.34935	21.6093	7.73355e-05	0.0038353		ENSBTAG00000011992	2.64452	1.08752	20.918	9.46268e-05	0.00515698		ENSBTAG00000021316	2.92871	0.41532	26.7683	1.87837e-05	0.00090555
ENSBTAG00000012992	-2.67518	2.01639	10.6605	0.00295777	0.0454523									ENSBTAG00000019521	7.29046	0.913449	23.8433	7.75008e-05	0.0038353		ENSBTAG00000026067	5.31644	-0.836201	21.466	9.5104e-05	0.00515698		ENSBTAG00000011992	3.01353	1.08752	26.7616	1.88164e-05	0.00090555
ENSBTAG00000018167	-2.6755	4.70523	10.584	0.00304669	0.0462024									ENSBTAG00000012319	5.4394	3.62209	21.601	7.75225e-05	0.0038353		ENSBTAG00000021069	-2.80253	4.91053	20.8981	9.5184e-05	0.00515698		ENSBTAG00000020067	2.66218	0.765377	26.6285	1.94804e-05	0.000934467
ENSBTAG00000010085	2.09051	2.837	10.582	0.00304909	0.0462024									ENSBTAG00000001032	5.45265	5.42982	21.5324	7.90788e-05	0.00386384		ENSBTAG00000000585	3.07365	-0.366518	20.8814	9.56524e-05	0.00515698		ENSBTAG00000013339	3.19125	0.147891	26.5183	2.0049e-05	0.000953053
ENSBTAG00000010880	-4.34619	7.25606	10.5656	0.0030685	0.0463278									ENSBTAG00000025337	4.46389	4.24465	21.439	8.12543e-05	0.00392157		ENSBTAG00000014326	-3.40013	4.64397	20.8736	9.58728e-05	0.00515698		ENSBTAG00000012097	3.36153	-0.0458248	26.4823	2.02388e-05	0.000953458
ENSBTAG00000038183	-2.52988	-0.784678	10.5523	0.00308447	0.0463278									ENSBTAG00000013117	3.17097	3.83428	21.2994	8.46255e-05	0.00398646		ENSBTAG00000015059	6.63554	2.65073	20.8025	9.7901e-05	0.00520227		ENSBTAG00000013760	2.54067	0.844823	26.47	2.03041e-05	0.000953687
ENSBTAG00000032531	-3.29433	2.49536	10.4789	0.0031736	0.0469847									ENSBTAG00000005825	-3.86054	2.65142	21.2955	8.47227e-05	0.00398646		ENSBTAG00000019777	-3.40328	4.5556	20.778	9.86115e-05	0.00520336		ENSBTAG00000002756	-3.73776	4.79564	26.4334	2.04995e-05	0.000960008
ENSBTAG00000006419	-4.34793	5.67557	10.4673	0.00318795	0.0470991									ENSBTAG00000023938	-3.94499	4.88689	21.2914	8.48225e-05	0.00398646		ENSBTAG00000004038	3.37458	3.07086	20.7234	0.000100215	0.00522167		ENSBTAG00000001598	2.64406	-0.246822	26.27	2.12883e-05	0.000987666
ENSBTAG00000006998	-2.4478	-1.09849	10.4631	0.00319326	0.0470991									ENSBTAG00000008181	-2.28983	4.84313	21.2894	8.48721e-05	0.00398646		ENSBTAG00000027201	2.23142	4.27865	20.7164	0.000100422	0.00522167		ENSBTAG00000009797	3.26409	0.860252	26.2245	2.16542e-05	0.000995935
ENSBTAG00000002092	-5.67953	7.01445	10.4321	0.00323205	0.0474432									ENSBTAG00000018399	-2.66853	3.95689	21.2425	8.60415e-05	0.00398985		ENSBTAG00000027080	2.63305	4.62313	20.706	0.000100733	0.00522167		ENSBTAG00000011338	-2.10688	7.17598	26.215	2.17084e-05	0.000995935
ENSBTAG00000009650	-2.68333	0.0773755	10.4179	0.00324989	0.0474432									ENSBTAG00000020223	2.47548	3.46766	21.2349	8.62322e-05	0.00398985		ENSBTAG00000046911	3.324	-0.618639	20.5886	0.000104295	0.00532512		ENSBTAG00000037533	5.06398	7.32068	26.1872	2.18677e-05	0.00100033
ENSBTAG00000003509	2.20211	4.37681	10.4074	0.00326329	0.0474432									ENSBTAG00000000238	3.40708	3.26207	21.2295	8.63688e-05	0.00398985		ENSBTAG00000011044	-2.67806	5.39833	20.5556	0.00010532	0.00532512		ENSBTAG00000002157	5.99483	5.48895	26.1454	2.21096e-05	0.00100848
ENSBTAG00000017069	2.60005	2.97436	10.3722	0.00330839	0.0476396									ENSBTAG00000030974	3.56843	5.67376	21.2259	8.6461e-05	0.00398985		ENSBTAG00000048125	3.4556	1.27285	20.4611	0.000108316	0.00544408		ENSBTAG00000048237	2.86983	-0.128381	25.9122	2.34696e-05	0.00106436
ENSBTAG00000046725	-2.75776	8.15507	10.3117	0.00338761	0.0480784									ENSBTAG00000005353	3.64591	10.7791	21.2024	8.70564e-05	0.00399882		ENSBTAG00000038770	-2.11834	1.79973	20.4123	0.000109898	0.00546762		ENSBTAG00000033190	2.09272	5.38425	25.8481	2.39153e-05	0.00107451
ENSBTAG00000001139	-2.08861	3.47775	10.3056	0.0033956	0.0481463									ENSBTAG00000019824	-3.33209	3.35404	21.1982	8.71621e-05	0.00399882		ENSBTAG00000017655	3.18096	3.45297	20.404	0.00011017	0.00546762		ENSBTAG00000000044	6.30501	1.20676	26.609	2.43076e-05	0.00108368
ENSBTAG00000030517	-3.09419	-0.319127	10.2823	0.00342673	0.0483135									ENSBTAG00000018513	2.53989	8.86571	21.185	8.75009e-05	0.00400272		ENSBTAG00000002739	3.69514	1.80143	20.3705	0.000111274	0.00549919		ENSBTAG00000020141	4.48053	1.52685	25.6209	2.54023e-05	0.00110491
ENSBTAG00000002593	-3.40955	-1.38351	10.2665	0.00344805	0.0484218									ENSBTAG00000027715	-3.01115	3.50768	21.1361	8.87606e-05	0.00404727		ENSBTAG00000040398	2.29135	4.5152	20.2652	0.000114824	0.00557782		ENSBTAG00000016801	3.55993	2.08736	25.6192	2.5414e-05	0.00110491
ENSBTAG00000046264	-2.857	2.41709	10.2504	0.00346978	0.0484218									ENSBTAG00000009702	5.51596	8.68963	21.1274	8.89875e-05	0.00404727		ENSBTAG00000004869	3.55876	1.33338	20.2098	0.000116741	0.00563426		ENSBTAG00000048172	-2.36687	6.2805	25.552	2.58727e-05	0.00111152
ENSBTAG00000023039	-2.68839	4.55532	10.2431	0.00347977	0.0484711									ENSBTAG00000021508	4.83889	7.29521	21.0973	8.97743e-05	0.00405943		ENSBTAG00000013009	-2.74117	4.50523	20.1925	0.000117348	0.00564632		ENSBTAG00000029926	7.68834	-1.17853	28.5896	2.59042e-05	0.00111152
ENSBTAG00000022244	-2.53707	7.52411	10.209	0.0035266	0.0486898									ENSBTAG00000007554	4.07538	3.87641	21.0878	9.00267e-05	0.00405943		ENSBTAG00000039340	6.36732	-0.834486	20.6055	0.000121381	0.00576997		ENSBTAG00000011534	4.70123	1.52954	25.5128	2.61444e-05	0.00111152
ENSBTAG00000021699	2.42254	-1.16685	10.1786	0.00356905	0.0490224									ENSBTAG00000004943	-3.83668	4.07534	20.9996	9.23856e-05	0.00408857		ENSBTAG00000001938	-2.80957	5.32775	20.0296	0.000123219	0.00583976		ENSBTAG00000019540	-3.95665	2.40827	25.5085	2.61746e-05	0.00111152
ENSBTAG00000017183	-3.01615	8.31921	10.1732	0.00357655	0.0490827									ENSBTAG00000020067	2.34929	0.765377	20.9959	9.24864e-05	0.00408857		ENSBTAG00000008758	-3.62666	6.07049	20.0174	0.000123668	0.00584351		ENSBTAG00000008652	2.72555	6.27097	25.4867	2.63269e-05	0.00111152
ENSBTAG00000014525	-4.06959	4.72274	10.1548	0.00360261	0.0493545									ENSBTAG00000015875	-3.66189	3.44476	20.9015	9.50875e-05	0.00418014		ENSBTAG00000007741	-2.5039	4.09426	20.0057	0.000124105	0.00584663		ENSBTAG00000021968	2.98447	-0.154275	25.4749	2.63804e-05	0.00111152
ENSBTAG00000023600	-3.5446	6.22363	10.1388	0.00362525	0.0495223									ENSBTAG00000010880	5.80729	7.25606	20.886	9.55241e-05	0.00418767		ENSBTAG00000002724	2.35779	-0.875255	19.9522	0.000125364	0.00588838		ENSBTAG00000013537	2.34157	4.09866	25.4693	2.64497e-05	0.00111152
ENSBTAG00000021009	-2.87237	6.64133	10.0829	0.00370596	0.0496077									ENSBTAG00000005850	2.49241	2.00334	20.8695	9.59877e-05	0.00419634		ENSBTAG00000019340	2.10284	1.49426	19.957	0.000125934	0.00589762		ENSBTAG00000017896	2.88314	3.68626	25.4648	2.64816e-05	0.00111152
														ENSBTAG00000020701	4.28333	6.47119	20.8349	9.69704e-05	0.00422277		ENSBTAG00000002849	3.11656	-0.664516	19.9389	0.000126623	0.00591232		ENSBTAG00000003043	-2.71206	6.17879	25.4257	2.67592e-05	0.00111698
														ENSBTAG00000011051	-2.01187	3.96291	20.805	9.78306e-05	0.0042307		ENSBTAG00000023002	2.22118	5.691	19.9	0.000128112	0.00592921		ENSBTAG00000047635	2.50083	-0.559385	25.3439	2.71296e-05	0.00111961
														ENSBTAG00000013100	-3.76762	4.98018	20.8044	9.7846e-05	0.0042307		ENSBTAG00000014453	-2.42612	5.28077	19.7893	0.00013246	0.00604823		ENSBTAG00000001086	-2.05219	7.26754	25.3645	2.72011e-05	0.00111961
														ENSBTAG00000002224	-3.24691	5.60656	20.7506	9.94139e-05	0.00428675		ENSBTAG00000017133	-2.69646	3.77891	19.6597	0.000137753	0.00621148		ENSBTAG00000016142	3.3651	3.13445	25.069	2.94451e-05	0.00116467
														ENSBTAG00000038865	2.46195	3.76537	20.7363	9.98341e-05	0.00429314		ENSBTAG00000046286	-2.39854	3.75125	19.6363	0.000138733	0.00623783		ENSBTAG00000008714	2.82128	3.23806	25.0419	2.96611e-05	0.00117028
														ENSBTAG00000007121	-2.26586	4.96055	20.6868	0.000101306	0.00430946		ENSBTAG00000009742	2.81593	4.77471	19.5897	0.000140706	0.0063086		ENSBTAG00000021709	3.52935	-0.139096	24.9789	3.01686e-05	0.00118388
														ENSBTAG00000008758	-3.6872	6.07049	20.6422	0.00010265	0.00435026		ENSBTAG00000012319	5.11817	3.62209	19.5572	0.000142104	0.00633877		ENSBTAG00000027444	2.52742	6.86898	24.9712	3.02308e-05	0.00118388
														ENSBTAG00000022244	3.75429	7.52411	20.609	0.000103664	0.00436714		ENSBTAG00000008934	-3.35057	5.44028	19.5376	0.000142951	0.00633877		ENSBTAG00000002744	2.85537	4.6084	24.9562	3.0354e-05	0.00118576
														ENSBTAG00000016125	5.12987	0.318085	21.1559	0.000103785	0.00436714		ENSBTAG00000022671	3.66173	-1.22197	19.5368	0.000142986	0.00633877		ENSBTAG00000043383	-2.19456	-1.07442	24.9085	3.05033e-05	0.00118865
														ENSBTAG00000026704	-2.39639	3.36671	20.5966	0.000104045	0.00436714		ENSBTAG00000016771	-2.17089	6.65444	19.5032	0.000144454	0.0063732		ENSBTAG00000002849	3.4824	-0.664516	24.8921	3.08835e-05	0.00119776
														ENSBTAG00000000660	-3.3222	4.08455	20.5654	0.000105012	0.00438441		ENSBTAG00000004824	3.59848	6.60254	19.4593	0.000146391	0.00643552		ENSBTAG00000008259	3.18589	-0.954552	24.848	3.11716e-05	0.00120281
														ENSBTAG00000030973	3.38446	1.23249	20.5472	0.000105581	0.0043965		ENSBTAG00000021181	-3.0668	4.3398	19.4299	0.00014771	0.00646406		ENSBTAG00000014038	2.86423	0.158722	24.7992	3.1669e-05	0.00121311
														ENSBTAG00000003366	2.31204	3.81013	20.5257	0.000106256	0.00440704		ENSBTAG00000024560	3.35432	0.509458	19.4203	0.000148139	0.00646406		ENSBTAG00000008436	-2.79276	5.09581	24.7765	3.18641e-05	0.00121468
														ENSBTAG00000014380	-2.51003	6.16178	20.5145	0.000106613	0.00440704		ENSBTAG00000019585	3.2731	6.35759	19.4029	0.00014893	0.00646788		ENSBTAG00000005288	4.08977	6.74258	24.7506	3.20883e-05	0.00121472
														ENSBTAG00000017133	-2.75341	3.77891	20.5126	0.000106672	0.00440704		ENSBTAG00000002115	-2.01802	1.15079	19.3874	0.000149609	0.00646886		ENSBTAG00000023806	3.99199	5.60202	24.7439	3.21462e-05	0.00121472
														ENSBTAG00000033422	4.22083	3.73842	20.4887	0.000107432	0.00442687		ENSBTAG00000046594	-3.64108	2.88573	19.3634	0.00015073	0.00647048		ENSBTAG00000002258	-5.21027	3.42439	24.6743	3.27584e-05	0.00123387
														ENSBTAG00000008934	-3.43623	5.44028	20.4771	0.000107801	0.00443049		ENSBTAG00000018508	2.20371	2.44552	19.3523	0.000151243	0.00647048		ENSBTAG00000013573	-3.10109	5.78505	24.6233	3.32154e-05	0.00124366
														ENSBTAG00000021189	4.48262	2.92629	20.4564	0.000108467	0.00444086		ENSBTAG00000010276	-2.71084	3.34853	19.3176	0.000152854	0.00651272		ENSBTAG00000006907	4.05145	9.48275	24.619	3.32547e-05	0.00124366
														ENSBTAG00000014465	-2.72744	9.51742	20.4287	0.000109366	0.00445997		ENSBTAG00000037533	4.16862	7.32068	19.3007	0.000153643	0.00651272		ENSBTAG00000019498	-2.3936	7.699	24.6018	3.341e-05	0.00124652
														ENSBTAG00000019743	-3.23707	3.81665	20.4174	0.000109733	0.00446341		ENSBTAG00000015875	-3.50231	3.44476	19.2998	0.000153688	0.00651272		ENSBTAG00000031696	2.94233	3.83536	24.5406	3.39705e-05	0.0012585
														ENSBTAG00000004004	2.46363	5.87067	20.4078	0.000110047	0.00446469		ENSBTAG00000022514	6.03795	-0.0501969	20.3605	0.000154729	0.00651272		ENSBTAG00000004035	2.67996	5.67772	24.521	3.41522e-05	0.00125932
														ENSBTAG00000043530	-2.42361	0.546206	20.3754	0.000111114	0.00449642		ENSBTAG00000007121	-2.18339	4.96055	19.2772	0.00015475	0.00651272		ENSBTAG00000030210	2.60709	-0.377567	24.4069	3.50735e-05	0.00128728
														ENSBTAG00000010384	-3.66309	3.03239	20.334	0.000112492	0.00452896		ENSBTAG00000017722	3.65342	-0.771959	19.2537	0.000155867	0.00652052		ENSBTAG00000003692	-3.10331	5.1851	24.3943	3.53516e-05	0.00128956
														ENSBTAG00000007102	-2.35035	5.06708	20.3006	0.000113617	0.00456174		ENSBTAG00000040098	-2.73954	0.157467	19.2374	0.000156642	0.00652275		ENSBTAG00000002885	4.7721	0.288739	24.3899	3.5394e-05	0.00128956
														ENSBTAG00000015595	-3.62244	5.56415	20.2521	0.000115277	0.00456174		ENSBTAG00000005163	3.65127	6.6428	19.2115	0.000157891	0.00654118		ENSBTAG00000047531	3.0415	0.85694	24.3871	3.54216e-05	0.00128956
														ENSBTAG00000035319	-3.24094	4.32147	20.2459	0.000115488	0.00456174		ENSBTAG00000007247	-2.6276	3.97682	19.211	0.000157913	0.00654118		ENSBTAG00000039340	6.97869	-0.834486	25.0949	3.57602e-05	0.00129589
														ENSBTAG00000030520	2.27215	4.52398	20.2338	0.000115908	0.00456174		ENSBTAG00000023216	3.10014	1.03241	19.2023	0.000158336	0.0065415		ENSBTAG00000000983	5.73611	2.06587	24.3481	3.58008e-05	0.00129589
														ENSBTAG00000040065	-3.35991	2.8145	20.2242	0.000116242	0.0045635		ENSBTAG00000021709	3.08244	-0.139096	19.1837	0.000159238	0.00656162		ENSBTAG00000021272	4.74506	3.64596	24.3038	3.6237e-05	0.00129975
														ENSBTAG00000021181	-3.12657	4.3398	20.2082	0.000116799	0.00457399		ENSBTAG00000016398	-2.46429	1.58522	19.1476	0.000161008	0.00660007		ENSBTAG00000014602	2.92305	1.04791	24.2894	3.63799e-05	0.00130192
														ENSBTAG00000006972	-2.55175	3.87333	20.1734	0.000118021	0.00458393		ENSBTAG00000012653	4.39196	3.72685	19.046	0.000166108	0.00672182		ENSBTAG00000010303	3.18068	3.82571	24.2026	3.72547e-05	0.00132422
														ENSBTAG00000010774	-2.5021	4.37689	20.1646	0.000118329	0.00458393		ENSBTAG00000004488	3.78661	4.15986	18.9986	0.000168547	0.00678095		ENSBTAG00000043530	-2.7049	0.546206	24.1943	3.73395e-05	0.00132425
														ENSBTAG00000021069	-2.73714	4.91053	20.1597	0.000118505	0.00458393		ENSBTAG00000014239	-3.84634	3.8106	18.9555	0.000170796	0.00684139		ENSBTAG00000042882	3.80982	-1.60812	24.1437	3.7777e-05	0.00132666
														ENSBTAG00000002749	3.74219	-1.00483	20.6626	0.000119415	0.0045879		ENSBTAG00000008714	2.42041	3.23806	18.9123	0.000173087	0.00686407		ENSBTAG00000011944	3.96765	1.63741	24.1398	3.79006e-05	0.00132666
														ENSBTAG00000029906	5.31552	0.257559	20.6607	0.00011948	0.0045879		ENSBTAG00000001344	3.85665	0.429528	18.848	0.000176554	0.00696594		ENSBTAG00000017655	3.50019	3.45297	24.1208	3.80992e-05	0.00132733
														ENSBTAG00000006591	-3.42228	3.7912	20.1131	0.000120171	0.00459972		ENSBTAG00000012925	-3.17758	4.1426	18.8008	0.000179144	0.00702984		ENSBTAG00000001120	2.61575	5.03086	24.0798	3.85309e-05	0.00133762
														ENSBTAG00000040028	5.39479	5.29016	20.1075	0.00012037	0.00459972		ENSBTAG00000013015	4.18693	2.34693	18.796	0.000179408	0.00702984		ENSBTAG00000019230	4.30582	0.272108	24.0399	3.89549e-05	0.00134822
														ENSBTAG00000004085	-3.06038	4.11627	20.0724	0.000121644	0.00463715		ENSBTAG00000009696	4.59652	7.98845	18.7942	0.00017951	0.00702984		ENSBTAG00000004038	3.67707	3.07086	24.0247	3.91185e-05	0.00135024
														ENSBTAG00000013009	-2.72155	4.50523	20.0356	0.000122997	0.00465049		ENSBTAG00000015132	3.98901	2.58961	18.7691	0.000180908	0.00703222		ENSBTAG00000002981	-4.02128	4.70325	24.0185	3.91846e-05	0.00135024
														ENSBTAG00000005456	-3.73979	3.95957	20.0292	0.000123233	0.00465049		ENSBTAG00000018249	2.53561	4.32595	18.7308	0.000183066	0.00705459		ENSBTAG00000024560	3.74636	0.509458	23.882	4.06867e-05	0.0013809
														ENSBTAG00000009983	-2.60651	4.95458	20.0072	0.000124049	0.00465049		ENSBTAG00000016801	2.98525	2.08736	18.7114	0.000184165	0.00705459		ENSBTAG00000026779	4.7499	-1.53125	23.8467	4.10844e-05	0.00138866
														ENSBTAG00000020710	-2.1846	2.82558	20.007	0.000124056	0.00465049		ENSBTAG00000046910	-3.3704	4.75843	18.6715	0.000186457	0.0071251		ENSBTAG00000013706	2.0781	3.05254	23.7843	4.17981e-05	0.00139383
														ENSBTAG00000046838	3.64645	2.37789	19.8405	0.000130432	0.00484404		ENSBTAG00000030338	2.48433	-1.51878	18.5928	0.000190028	0.0072171		ENSBTAG00000003876	2.22372	4.25712	23.7788	4.18625e-05	0.00139383
														ENSBTAG00000009797	2.81162	0.860252	19.798	0.000132114	0.00487583		ENSBTAG00000018358	2.96216	6.11834	18.5628	0.000192858	0.00726574		ENSBTAG00000037986	2.74979	-0.266336	23.7619	4.19545e-05	0.00139395
														ENSBTAG00000005714	2.86427	11.1095	19.7678	0.000133322	0.00490465		ENSBTAG00000048237	2.41993	-0.128381	18.5248	0.000194917	0.00730684		ENSBTAG00000022158	5.15941	7.97655	23.6919	4.28813e-05	0.0014099
														ENSBTAG00000024726	-3.86317	4.69964	19.7411	0.000134403	0.0049329		ENSBTAG00000009355	2.4154	5.41888	18.4942	0.000197017	0.00733329		ENSBTAG00000008499	-3.33136	4.47857	23.5976	4.40168e-05	0.00143231
														ENSBTAG00000022158	4.57341	7.97655	19.6713	0.000137271	0.00499175		ENSBTAG00000007237	-3.12933	5.23682	18.4523	0.0001996	0.00734766		ENSBTAG00000018214	4.9338	5.84501	23.5214	4.49581e-05	0.00145702
														ENSBTAG00000021445	2.32394	4.33507	19.5621	0.000141889	0.00508931		ENSBTAG00000000589	3.25502	3.41173	18.4423	0.000200229	0.00734766		ENSBTAG00000018137	6.1999	4.43216	23.4544	4.58035e-05	0.00147525
														ENSBTAG00000018775	-2.5139	6.27605	19.533	0.00014315	0.0051229		ENSBTAG00000038865	2.30885	3.76537	18.4057	0.000202524	0.00734766		ENSBTAG00000015293	-2.89812	1.90501	23.4033	4.6459e-05	0.00149331
														ENSBTAG00000017446	-4.03824	4.01994	19.4985	0.000144659	0.00515351		ENSBTAG00000016142	2.81887	3.13445	18.3011	0.000209252	0.00743786		ENSBTAG00000012034	4.9636	-0.271186	24.0683	4.67903e-05	0.0015009
														ENSBTAG00000046696	-4.46282	0.379568	19.4871	0.000145162	0.00515981		ENSBTAG00000007206	2.82694	4.69355	18.2698	0.000211312	0.00749421		ENSBTAG00000010986	3.38985	2.23569	23.3059	4.7739e-05	0.00152823
														ENSBTAG00000000264	2.60485	0.142248	19.4716	0.000145848	0.00517252		ENSBTAG00000000660	-3.10736	4.08455	18.2415	0.000213193	0.00751432		ENSBTAG00000031217	4.1914	9.11196	23.2548	4.84253e-05	0.00154394
														ENSBTAG00000014239	-3.88091	3.8106	19.4572	0.000146487	0.00518355		ENSBTAG00000007423	3.25018	-1.14675	18.21	0.000214794	0.00751635		ENSBTAG00000005269	-3.82175	3.89434	23.2259	4.88176e-05	0.001548
														ENSBTAG00000021657	4.61481	1.2319	20.4975	0.000148973	0.00523627		ENSBTAG00000003502	4.43352	0.473739	18.1765	0.000217577	0.00757062		ENSBTAG00000040098	-3.09653	0.157467	23.2129	4.89952e-05	0.001548
														ENSBTAG00000012720	2.10975	2.86473	19.3634	0.000150732	0.00526296		ENSBTAG00000009255	2.09822	3.17678	18.1608	0.000218654	0.00757062		ENSBTAG00000006541	5.12293	7.88715	23.2094	4.90431e-05	0.001548
														ENSBTAG00000043548	3.39841	1.28881	19.2069	0.000158113	0.0054713		ENSBTAG00000012370	5.80217	6.08456	18.1463	0.000219648	0.00757062		ENSBTAG00000007121	-2.41631	4.96055	23.1728	4.95485e-05	0.0015584
														ENSBTAG00000012034	4.50434	-0.271186	19.6904	0.000158203	0.0054713		ENSBTAG00000039509	-2.34343	1.59039	18.1455	0.000219702	0.00757062		ENSBTAG00000020105	6.17288	1.59419	23.8389	4.9728e-05	0.00155871
														ENSBTAG00000014898	2.56789	2.31331	19.1833	0.000159259	0.0054713		ENSBTAG00000026986	4.12885	10.5606	18.049	0.00022647	0.00771665		ENSBTAG00000002739	3.97756	1.80143	23.1563	4.97777e-05	0.00155871
														ENSBTAG00000014547	3.97466	4.90443	19.1715	0.000159833	0.0054713		ENSBTAG00000003043	-2.24108	6.17879	18.0462	0.000226671	0.00771665		ENSBTAG00000013662	3.29513	6.79284	23.1392	5.00167e-05	0.0015631
														ENSBTAG00000010664	2.0209	1.88078	19.1577	0.000160513	0.0054713		ENSBTAG00000013100	-3.46244	4.98018	18.0424	0.000226942	0.00771665		ENSBTAG00000020620	4.73886	-0.790667	23.0625	5.11036e-05	0.00158451
														ENSBTAG00000004899	3.18437	3.4624	19.0942	0.000163667	0.00556127		ENSBTAG00000018806	-2.04459	3.33019	18.0203	0.000228527	0.00771665		ENSBTAG00000003502	5.06362	0.473739	23.0457	5.13459e-05	0.0015889
														ENSBTAG00000027875	2.14768	5.8693	19.0905	0.000163857	0.00556127		ENSBTAG00000006434	2.02311	8.7983	18.011	0.000229194	0.00771665		ENSBTAG00000020342	2.57507	5.1661	22.9941	5.20957e-05	0.00159956
														ENSBTAG00000007638	-2.8614	1.13327	19.0634	0.000165225	0.00559567		ENSBTAG00000015408	-2.05669	4.67324	18.0093	0.000229319	0.00771665		ENSBTAG00000022671	3.94974	-1.22197	22.9507	5.27355e-05	0.00161293
														ENSBTAG00000031696	2.55798	3.83536	19.0404	0.000166394	0.0056232		ENSBTAG00000018571	-4.32497	5.23593	17.9589	0.000232991	0.00780227		ENSBTAG00000047322	-3.86507	4.2611	22.94	5.2894e-05	0.00161319
														ENSBTAG00000002744	2.45752	4.6084	19.0333	0.00016676	0.00562351		ENSBTAG00000007654	2.93393	1.77399	17.9312	0.000235039	0.00780227		ENSBTAG00000018352	5.70158	4.63308	22.9157	5.32574e-05	0.00161892
														ENSBTAG00000037527	7.43249	2.57145	18.9882	0.000169089	0.00566942		ENSBTAG00000012900	2.00938	1.07665	17.9207	0.000235818	0.00780227		ENSBTAG00000005168	3.93961	1.50439	22.8832	5.37471e-05	0.00161892
														ENSBTAG00000021916	4.24099	7.23367	18.9519	0.000170984	0.00569525		ENSBTAG00000016042	-2.42307	0.400087	17.8603	0.000240359	0.00791619		ENSBTAG00000011051	-2.12273	3.96291	22.8611	5.40821e-05	0.00161892
														ENSBTAG00000000638	-2.91394	3.57884	18.945	0.000171348	0.00569525		ENSBTAG00000011534	3.84132	1.52954	17.8493	0.0002412	0.00791619		ENSBTAG00000007206	3.2093	4.69355	22.8559	5.41624e-05	0.00161892
														ENSBTAG00000046325	-2.64925	4.4008	18.9301	0.000172137	0.0057073		ENSBTAG00000037794	4.11418	5.10803	18.2738	0.000241268	0.00791619		ENSBTAG00000009355	2.70882	5.41888	22.7778	5.53684e-05	0.00163281
														ENSBTAG00000039231	2.07045	9.22807	18.9052	0.000173467	0.0057114		ENSBTAG00000023938	-3.5421	4.88689	17.839	0.000241982	0.00792314		ENSBTAG00000019777	-3.59615	4.5556	22.7723	5.54548e-05	0.00163281
														ENSBTAG00000001865	2.47602	4.76345	18.8812	0.00017475	0.00572697		ENSBTAG00000012443	-2.30016	5.7236	17.8223	0.000243269	0.00793239		ENSBTAG00000000309	2.29477	-0.206964	22.7335	5.56743e-05	0.00163622
														ENSBTAG00000016619	-3.55456	2.63532	18.8783	0.000174908	0.00572697		ENSBTAG00000016713	2.247	2.38442	17.7922	0.000245595	0.00797657		ENSBTAG00000016042	-2.80524	0.400087	22.7089	5.6456e-05	0.00165426
														ENSBTAG00000046580	2.46773	2.21164	18.7396	0.000182569	0.0059043		ENSBTAG00000002744	2.36592	4.6084	17.7382	0.000249833	0.00807963		ENSBTAG00000013015	4.67194	2.34693	22.691	5.6743e-05	0.00165426
														ENSBTAG00000011500	5.00241	8.51407	18.7137	0.000184035	0.00592744		ENSBTAG00000017896	2.36547	3.68626	17.7188	0.000251375	0.00809631		ENSBTAG00000014326	-3.57416	4.64397	22.6845	5.68479e-05	0.00165426
														ENSBTAG00000011784	3.15772	0.562547	18.6887	0.000185467	0.00596139		ENSBTAG00000027875	2.06312	5.8693	17.7075	0.000252281	0.00810895		ENSBTAG00000014920	3.46521	-1.37752	22.6499	5.72208e-05	0.00165426
														ENSBTAG00000009035	-3.57431	4.16656	18.6798	0.000185979	0.00596569		ENSBTAG00000029906	4.97612	0.257559	18.1156	0.000253143	0.00812012		ENSBTAG00000016746	-4.18095	5.5634	22.6613	5.72228e-05	0.00165426
														ENSBTAG00000002331	-3.81574	4.43896	18.6573	0.000187279	0.00598308		ENSBTAG00000019658	2.17823	4.0133	17.6741	0.000254964	0.00816196		ENSBTAG00000004770	3.93074	4.87711	22.659	5.72591e-05	0.00165426
														ENSBTAG00000039967	-4.67598	-1.39824	18.6263	0.000189091	0.00602875		ENSBTAG00000026971	-3.13706	4.03092	17.6637	0.00025581	0.00816858		ENSBTAG00000038865	2.58297	3.76537	22.6326	5.76895e-05	0.00166142
														ENSBTAG00000018366	3.46329	0.465811	18.6073	0.00019021	0.00603094		ENSBTAG00000018775	-2.37909	6.27605	17.6576	0.000256308	0.00816858		ENSBTAG00000015408	-2.32857	4.67324	22.5944	5.83162e-05	0.00167618
														ENSBTAG00000013303	2.37548	5.625	18.6056	0.000190306	0.00603094		ENSBTAG00000023147	2.13986	1.23244	17.6265	0.000258856	0.00821986		ENSBTAG00000016255	-3.14146	2.08373	22.5821	5.8521e-05	0.00167618
														ENSBTAG00000015408	-2.08825	4.67324	18.5748	0.000192141	0.00607689		ENSBTAG00000024340	3.54421	0.265297	17.6065	0.000260502	0.00823895		ENSBTAG00000021508	5.03969	7.29521	22.463	6.05337e-05	0.00171516
														ENSBTAG00000009387	4.78728	8.23421	18.5404	0.000194205	0.00609268		ENSBTAG00000004860	3.5895	-0.29614	17.5568	0.00026466	0.00833705		ENSBTAG00000016713	2.54261	2.38442	22.4297	6.11097e-05	0.00172528
														ENSBTAG00000006065	-2.1342	6.25757	18.5368	0.000194419	0.00609268		ENSBTAG00000021346	-2.14416	4.00606	17.5196	0.000267816	0.00838625		ENSBTAG00000020194	2.70549	2.78316	22.3924	6.17617e-05	0.00173841
														ENSBTAG00000013921	6.15931	8.24239	18.528	0.000194957	0.00609268		ENSBTAG00000003398	-2.73544	2.2497	17.4871	0.00027061	0.00843786		ENSBTAG00000019276	-3.93195	5.72649	22.3879	6.18408e-05	0.00173841
														ENSBTAG00000046725	3.8359	8.15507	18.4963	0.000196886	0.00614082		ENSBTAG00000019901	-2.37634	3.93637	17.4731	0.000271816	0.00843786		ENSBTAG00000015132	4.42148	2.58961	22.3669	6.22117e-05	0.00174256
														ENSBTAG00000014897	3.1465	1.81614	18.4088	0.000202329	0.00625799		ENSBTAG00000007446	-2.12308	2.23687	17.4694	0.000272137	0.00843786		ENSBTAG00000020954	3.7554	0.511501	22.2817	6.37418e-05	0.00175869
														ENSBTAG00000000345	-2.1552	3.13021	18.4041	0.000202625	0.00625799		ENSBTAG00000018519	3.94713	3.02115	17.409	0.000277437	0.00855177		ENSBTAG00000015018	2.02691	1.31428	22.2446	6.43218e-05	0.00176544
														ENSBTAG00000022714	5.24227	4.1298	18.3101	0.000208665	0.0064069		ENSBTAG00000039607	2.78722	-0.266958	17.3874	0.000279361	0.00857759		ENSBTAG00000012285	4.09605	-0.0131011	22.1526	6.61367e-05	0.00180337
														ENSBTAG00000008661	3.55526	0.261654	18.2488	0.000212707	0.00651832		ENSBTAG00000002298	-2.72205	4.7431	17.3718	0.000280765	0.00860396		ENSBTAG00000001335	2.44424	4.65291	22.126	6.66428e-05	0.00181337
														ENSBTAG00000023002	2.1177	5.691	18.2221	0.00021449	0.00654755		ENSBTAG00000015118	3.19418	-0.196272	17.3022	0.00028709	0.00872997		ENSBTAG00000021708	-3.01069	4.57795	22.0998	6.71457e-05	0.00181987
														ENSBTAG00000008142	2.37724	2.58176	18.1985	0.00021608	0.00656516		ENSBTAG00000021657	4.31936	1.2319	18.1527	0.00029042	0.00881426		ENSBTAG00000011672	4.15296	-0.689657	22.0671	6.77762e-05	0.00182533
														ENSBTAG00000009383	-3.36173	5.04017	18.1973	0.000216164	0.00656516		ENSBTAG00000016924	2.09517	6.48523	17.2487	0.00029206	0.008847		ENSBTAG00000021069	-2.8885	4.91053	22.0508	6.80945e-05	0.00183078
														ENSBTAG00000020059	-2.38871	3.58145	18.1951	0.000216315	0.00656516		ENSBTAG00000010622	-2.05803	-0.201628	17.2278	0.000292788	0.00885208		ENSBTAG00000018216	-3.06401	2.99466	22.0006	6.90823e-05	0.00185345
														ENSBTAG00000019496	-2.65853	3.49537	18.1284	0.000220887	0.00666219		ENSBTAG00000027444	2.06442	6.86898	17.2256	0.000294231	0.00887869		ENSBTAG00000018358	3.26538	6.11834	21.9929	6.92367e-05	0.00185345
														ENSBTAG00000009618	-3.75756	3.01237	18.0958	0.00022316	0.00669254		ENSBTAG00000010880	5.10172	7.25606	17.1958	0.000297067	0.00888388		ENSBTAG00000009155	4.67972	3.98778	21.9403	7.02899e-05	0.00187068
														ENSBTAG00000011182	-2.08803	3.97842	18.0913	0.00022348	0.00669254		ENSBTAG00000013451	2.83401	-1.54984	17.1379	0.000301175	0.00898516		ENSBTAG00000007814	2.33719	7.08463	21.9313	7.04725e-05	0.00187239
														ENSBTAG00000045767	2.55656	-0.61782	18.0651	0.000225069	0.00672445		ENSBTAG00000019824	-2.94588	3.35404	17.1311	0.000303308	0.0089928		ENSBTAG00000017040	-2.81375	3.37424	21.8645	7.18401e-05	0.00189493
														ENSBTAG00000016131	-2.23604	5.15111	18.0641	0.000225398	0.00672445		ENSBTAG00000020573	3.17448	5.37222	17.1109	0.000305289	0.00901833		ENSBTAG00000015368	2.50245	3.40006	21.7931	7.33344e-05	0.00192408
														ENSBTAG00000006882	-3.36769	4.57565	18.0333	0.000227594	0.00676438		ENSBTAG00000033441	-3.48984	4.40998	17.1008	0.000306287	0.00901833		ENSBTAG00000019504	5.4904	2.25558	21.7879	7.34436e-05	0.00192408
														ENSBTAG00000005333	4.96734	7.87878	17.9775	0.000231629	0.00685848		ENSBTAG00000020067	2.11465	0.765377	17.0926	0.000307092	0.00902519		ENSBTAG00000006630	2.47131	0.0985005	21.7576	7.39842e-05	0.00192995
														ENSBTAG00000005604	4.32265	1.75888	17.9471	0.000233859	0.00691154		ENSBTAG00000005168	3.33734	1.50439	17.0698	0.000309361	0.00903956		ENSBTAG00000046807	2.83209	1.05409	21.7261	7.47668e-05	0.00193755
														ENSBTAG00000026986	4.11331	10.5606	17.9399	0.000234395	0.00691443		ENSBTAG00000016063	-3.38887	0.126995	17.0681	0.000309533	0.00903956		ENSBTAG00000009819	-4.09737	5.48027	21.573	7.81539e-05	0.0019959
														ENSBTAG00000004824	3.4255	6.60254	17.9036	0.000237095	0.0069325		ENSBTAG00000039337	6.88266	-1.45873	17.4352	0.000311968	0.00903956		ENSBTAG00000030520	2.35307	4.52398	21.5729	7.81564e-05	0.0019959
														ENSBTAG00000008471	8.24614	0.681866	17.8769	0.000239099	0.0069621		ENSBTAG00000019230	3.56302	0.272108	16.9751	0.000318966	0.00903956		ENSBTAG00000015419	3.31168	-1.41958	21.5169	7.92018e-05	0.00201933
														ENSBTAG00000009396	-4.12002	2.52722	17.8505	0.000241103	0.00698467		ENSBTAG00000027126	4.47483	-0.337372	17.3567	0.000319653	0.00903956		ENSBTAG00000008920	5.01698	5.46051	21.5018	7.97853e-05	0.00202439
														ENSBTAG00000005895	-3.81458	1.51217	17.843	0.000241681	0.00698572		ENSBTAG00000009983	-2.38036	4.95458	16.9539	0.000321158	0.00903956		ENSBTAG00000009255	2.29209	3.17678	21.4176	8.17601e-05	0.00205679
														ENSBTAG00000001877	-2.25014	1.68304	17.8371	0.000242128	0.00698586		ENSBTAG00000020080	3.41901	4.10195	16.9279	0.00032387	0.00903956		ENSBTAG00000018300	4.10962	1.61807	21.4163	8.17919e-05	0.00205679
														ENSBTAG00000032007	-2.78746	4.81406	17.8177	0.000243619	0.00701606		ENSBTAG00000013420	2.11299	2.13172	16.9101	0.000325743	0.00903956		ENSBTAG00000005776	3.50305	-0.384851	21.4077	8.19976e-05	0.00205679
														ENSBTAG00000018519	3.99187	3.02115	17.7625	0.000247914	0.00711377		ENSBTAG00000021118	3.58772	-1.35054	16.892	0.000327653	0.00903956		ENSBTAG00000017135	2.04175	4.23929	21.4069	8.20153e-05	0.00205679
														ENSBTAG00000045757	4.67812	8.18483	17.7472	0.000249119	0.00713538		ENSBTAG00000004035	2.18474	5.67772	16.8885	0.000328028	0.00903956		ENSBTAG00000000843	2.37839	3.06694	21.3202	8.41135e-05	0.00209135
														ENSBTAG00000020814	2.73446	2.1407	17.7338	0.000250183	0.00715287		ENSBTAG00000009155	3.98232	3.98778	16.8382	0.000333421	0.00905005		ENSBTAG00000043951	3.22389	3.05167	21.3069	8.44403e-05	0.00209274
														ENSBTAG00000007659	2.0627	4.73515	17.7083	0.000252212	0.00717449		ENSBTAG00000007799	-3.02077	3.49905	16.8299	0.000334316	0.00905005		ENSBTAG00000012925	-3.42207	4.1426	21.2675	8.54165e-05	0.00211292
														ENSBTAG00000026796	6.16251	-0.891246	19.2295	0.000254761	0.00717449		ENSBTAG00000035776	-2.24306	1.53007	16.7822	0.000339532	0.00912346		ENSBTAG00000027425	4.51174	-1.04085	21.7668	8.74301e-05	0.00214488
														ENSBTAG00000019901	-2.38398	3.93637	17.6563	0.000256414	0.00720059		ENSBTAG00000019743	-2.89049	3.81665	16.7787	0.000339919	0.00912346		ENSBTAG00000017280	4.07619	4.54395	21.1775	8.76915e-05	0.00214504
														ENSBTAG00000016801	2.88904	2.08736	17.6373	0.000257967	0.00723131		ENSBTAG00000009383	-3.20885	5.04017	16.7439	0.000343785	0.0091804		ENSBTAG00000020223	2.46937	3.46766	21.1291	8.8942e-05	0.00214862
														ENSBTAG00000018267	4.37289	5.43047	17.5991	0.00026112	0.00730673		ENSBTAG00000018137	4.99024	4.43216	16.7381	0.000344435	0.00918221		ENSBTAG00000016924	2.33844	6.48523	21.1247	8.90581e-05	0.00214862
														ENSBTAG00000005129	-3.43281	4.05939	17.5674	0.000263765	0.00734169		ENSBTAG00000006972	-2.30379	3.87333	16.7028	0.000348412	0.00924142		ENSBTAG00000031785	2.00009	2.41977	21.117	8.92591e-05	0.00214862
														ENSBTAG00000005765	2.57964	3.7875	17.5252	0.000267335	0.00741089		ENSBTAG00000011733	4.07047	-0.390922	16.656	0.00035376	0.00934719		ENSBTAG00000017892	2.77948	-0.592886	21.1093	8.92969e-05	0.00214862
														ENSBTAG00000004464	-2.32866	1.93525	17.4877	0.000270554	0.00745382		ENSBTAG00000011635	-2.71764	2.48829	16.5921	0.000361218	0.00946966		ENSBTAG00000007319	2.73205	2.47719	21.1152	8.93058e-05	0.00214862
														ENSBTAG00000021346	-2.13621	4.00606	17.4869	0.000270627	0.00745382		ENSBTAG00000047468	3.40904	-0.648632	16.5807	0.000362561	0.00948911		ENSBTAG00000018020	-2.21622	0.594301	21.063	9.05586e-05	0.00216545
														ENSBTAG00000003152	5.97977	1.27502	17.4649	0.000272529	0.00748009		ENSBTAG00000007791	2.24325	1.23485	16.5688	0.000363973	0.00951031		ENSBTAG00000018703	6.39464	-0.836361	23.1875	9.1037e-05	0.00217031
														ENSBTAG00000013451	2.83616	-1.54984	17.4361	0.00027368	0.00749864		ENSBTAG00000002331	-3.55553	4.43896	16.5457	0.000366724	0.00956633		ENSBTAG00000014546	5.41341	-2.09064	21.0355	9.14169e-05	0.0021731
														ENSBTAG00000011869	5.16921	4.18461	17.4094	0.000277407	0.00757445		ENSBTAG00000002258	-3.97302	3.42439	16.512	0.000370784	0.00962452		ENSBTAG00000025136	5.10503	2.45484	21.035	9.14293e-05	0.0021731
														ENSBTAG00000000281	-2.24479	2.35244	17.3744	0.000280525	0.00763319		ENSBTAG00000021526	3.83812	3.26219	16.4947	0.000372897	0.0096514		ENSBTAG00000014514	-2.74721	1.97034	21.014	9.19961e-05	0.0021822
														ENSBTAG00000007148	2.55483	1.24271	17.3519	0.00028256	0.00767531		ENSBTAG00000007814	2.00294	7.08463	16.4863	0.00037392	0.0096514		ENSBTAG00000007783	-2.73425	6.23383	21.0105	9.20887e-05	0.0021822
														ENSBTAG00000037794	4.03552	5.10803	17.7039	0.000287136	0.00773308		ENSBTAG00000003458	-2.81399	4.18424	16.4822	0.000374419	0.0096514		ENSBTAG00000017133	-2.79653	3.77891	20.9805	9.29039e-05	0.00218837
														ENSBTAG00000046744	-2.96433	0.493523	17.1998	0.000296679	0.0079091		ENSBTAG00000007102	-2.09597	5.06708	16.4403	0.00037959	0.00970937		ENSBTAG00000001938	-2.87945	5.32775	20.9303	9.42845e-05	0.00221195
														ENSBTAG00000011582	2.61059	4.72295	17.1918	0.000297451	0.0079163		ENSBTAG00000021251	3.0164	-1.63838	16.7443	0.000385814	0.00982279		ENSBTAG00000020061	4.26288	-0.936104	20.9289	9.43252e-05	0.00221195
														ENSBTAG00000005877	2.58848	-0.53041	17.185	0.000298101	0.00792026		ENSBTAG00000001335	2.07848	4.65291	16.3725	0.000388134	0.00983267		ENSBTAG00000004488	4.00586	4.15986	20.9045	9.50036e-05	0.00222455
														ENSBTAG00000038598	4.89399	-0.84087	18.0476	0.000299529	0.0079315		ENSBTAG00000027425	3.9972	-1.04085	16.732	0.000388684	0.00983267		ENSBTAG00000010188	5.45712	-0.233003	22.127	9.58018e-05	0.00222672
														ENSBTAG00000006907	3.26092	9.48275	17.1481	0.00030166	0.00796121		ENSBTAG00000030520	2.02672	4.52398	16.336	0.000392806	0.00988174		ENSBTAG00000005965	4.67114	0.296905	20.8157	9.75218e-05	0.00224242
														ENSBTAG00000010741	2.86134	9.422	17.0994	0.000306427	0.00807351		ENSBTAG00000006999	3.65118	7.62222	16.3345	0.000393005	0.00988174		ENSBTAG00000026768	-4.61392	2.57051	20.8009	9.79471e-05	0.00224242
														ENSBTAG00000035013	-3.49014	1.91831	17.0823	0.000308121	0.00809349		ENSBTAG00000016255	-2.59291	2.08373	16.328	0.000393842	0.00988174		ENSBTAG00000046910	-3.59287	4.75843	20.7652	9.89847e-05	0.00225097
														ENSBTAG00000037921	3.90103	0.155784	17.4505	0.000310493	0.00813526		ENSBTAG00000021316	2.26319	0.41532	16.3145	0.000395588	0.00988687		ENSBTAG00000015258	2.72761	3.68471	20.7583	9.9188e-05	0.00225235
														ENSBTAG00000037986	2.32095	-0.266336	17.0501	0.000310833	0.00813526		ENSBTAG00000002355	3.90593	-0.0268431	16.2623	0.000402443	0.00998641		ENSBTAG00000040543	2.4746	0.258041	20.7095	0.000100627	0.00227195
														ENSBTAG00000047231	4.16859	6.50686	17.032	0.000313151	0.00816885		ENSBTAG00000001032	4.56512	5.42982	16.2524	0.000403756	0.00999916		ENSBTAG00000000660	-3.34319	4.08455	20.6358	0.000102845	0.00230201
														ENSBTAG00000007090	4.79238	6.40816	17.0237	0.000313993	0.00817729		ENSBTAG00000012184	-3.23758	2.65433	16.2489	0.000404224	0.00999916		ENSBTAG00000015416	3.85467	-0.239192	20.63	0.000103022	0.00230201
														ENSBTAG00000005163	3.39644	6.6428	17.0026	0.000316142	0.00821969		ENSBTAG00000047635	2.00094	-0.559385	16.2075	0.000407923	0.0100278		ENSBTAG00000003838	-3.03599	0.103586	20.5825	0.000104482	0.00232243
														ENSBTAG00000021709	2.88894	-0.139096	16.9792	0.000318539	0.00826839		ENSBTAG00000008336	-2.53571	0.706264	16.2081	0.000409689	0.0100399		ENSBTAG00000002749	3.79052	-1.00483	21.079	0.000106068	0.0023496
														ENSBTAG00000005974	2.17267	5.10117	16.9416	0.000322436	0.00834209		ENSBTAG00000010077	-2.82879	4.16211	16.1909	0.000412018	0.0100484		ENSBTAG00000009696	4.86137	7.98845	20.5063	0.00010687	0.00235717
														ENSBTAG00000037735	2.80795	0.658	16.8562	0.000331478	0.00849031		ENSBTAG00000020105	5.01543	1.59419	16.5382	0.000413252	0.0100492		ENSBTAG00000013079	2.30548	-0.358003	20.4567	0.000107865	0.00237274
														ENSBTAG00000014707	6.52196	2.01452	16.852	0.00033193	0.00849031		ENSBTAG00000039686	3.40132	0.946305	16.1577	0.000416564	0.0100786		ENSBTAG00000011416	-2.74869	3.446	20.4346	0.000109173	0.00238638
														ENSBTAG00000019262	-3.69622	6.52892	16.7836	0.000339381	0.00862262		ENSBTAG00000015214	4.86362	7.5673	16.1498	0.000417652	0.0100786		ENSBTAG00000038598	5.32453	-0.84087	21.6266	0.000109509	0.00239041
														ENSBTAG00000015132	3.73947	2.58961	16.7812	0.000339643	0.00862262		ENSBTAG00000000440	2.66439	6.37123	16.0549	0.000430948	0.0102615		ENSBTAG00000029906	5.34531	0.257559	20.8655	0.000112698	0.00243989
														ENSBTAG00000000044	4.98196	1.20676	17.0924	0.000347085	0.00873635		ENSBTAG00000011300	4.52241	-1.7649	16.3911	0.000433033	0.0102615		ENSBTAG00000039337	7.35723	-1.45873	20.8653	0.000112703	0.00243989
														ENSBTAG00000011534	3.70059	1.52954	16.6877	0.000350124	0.00877813		ENSBTAG00000006591	-2.99537	3.7912	16.0386	0.000433288	0.0102615		ENSBTAG00000008336	-2.89777	0.706264	20.2629	0.000114903	0.00244931
														ENSBTAG00000016413	2.54256	4.605	16.6619	0.000353089	0.00883115		ENSBTAG00000001120	2.09659	5.03086	16.0314	0.000434312	0.0102615		ENSBTAG00000013009	-2.74414	4.50523	20.2612	0.000114964	0.00244931
														ENSBTAG00000009371	2.13325	0.200836	16.6259	0.000356718	0.00889278		ENSBTAG00000011465	3.28939	6.54617	15.9732	0.000442776	0.0103921		ENSBTAG00000027126	4.90088	-0.337372	20.7824	0.000115395	0.0024544
														ENSBTAG00000004770	3.27861	4.87711	16.626	0.000357244	0.00889278		ENSBTAG00000011500	4.51456	8.51407	15.9617	0.000444471	0.0103921		ENSBTAG00000000585	3.0209	-0.366518	20.2249	0.000116217	0.00245863
														ENSBTAG00000047326	4.31996	0.11323	17.4031	0.000362676	0.00901377		ENSBTAG00000021420	2.21645	-0.254414	15.9575	0.000444526	0.0103921		ENSBTAG00000007247	-2.70034	3.97682	20.1923	0.000117354	0.00247936
														ENSBTAG00000002918	-2.02275	4.63766	16.5535	0.000365793	0.0090627		ENSBTAG00000046763	2.10969	-1.23954	15.9439	0.00044513	0.0103921		ENSBTAG00000026067	5.2281	-0.836201	20.7157	0.000117615	0.00248155
														ENSBTAG00000003458	-2.80253	4.18424	16.4714	0.000375745	0.00926563		ENSBTAG00000013155	-2.77355	-1.15468	15.9355	0.000446375	0.0104057		ENSBTAG00000022514	6.19338	-0.0501969	21.3516	0.000117939	0.00248507
														ENSBTAG00000047957	3.19935	6.43191	16.4344	0.000380323	0.00931132		ENSBTAG00000005825	-3.22938	2.65142	15.8973	0.000454081	0.0105542		ENSBTAG00000014992	-3.0232	0.437679	20.0571	0.000122203	0.00253765
														ENSBTAG00000000123	3.43549	-1.18133	16.4279	0.000381138	0.00931132		ENSBTAG00000001865	2.25516	4.76345	15.8914	0.000454958	0.010559		ENSBTAG00000001865	2.55736	4.76345	20.0203	0.000123562	0.00255577
														ENSBTAG00000006551	-3.54074	3.8634	16.4164	0.000382576	0.00933201		ENSBTAG00000020991	3.28915	-0.0454804	15.8807	0.000456579	0.0105811		ENSBTAG00000013798	-3.66682	0.0669412	20.0039	0.00012417	0.00256164
														ENSBTAG00000013420	2.07572	2.13172	16.3902	0.000385874	0.00938347		ENSBTAG00000019294	3.35433	4.93377	15.8669	0.000458693	0.0105835		ENSBTAG00000012443	-2.45015	5.7236	19.9831	0.000124949	0.00257099
														ENSBTAG00000027444	2.00877	6.86898	16.3729	0.000388075	0.00940087		ENSBTAG00000004019	3.54852	3.78565	15.8418	0.000462525	0.0106408		ENSBTAG00000001414	3.88872	3.03632	19.9624	0.000125729	0.00257518
														ENSBTAG00000016948	4.1804	4.13396	16.3659	0.000388973	0.00940087		ENSBTAG00000001598	2.04366	-0.246822	15.8233	0.000464171	0.0106411		ENSBTAG00000017041	2.64845	-0.541743	19.8824	0.000128549	0.00260098
														ENSBTAG00000016357	5.92661	-0.771345	16.6452	0.00039949	0.00961912		ENSBTAG00000006630	2.09732	0.0985005	15.7962	0.000469165	0.0107154		ENSBTAG00000001443	5.08693	-0.267869	19.8843	0.00012872	0.0026011
														ENSBTAG00000012443	-2.18139	5.7236	16.2386	0.000405598	0.009743		ENSBTAG00000006404	-2.03378	4.42732	15.785	0.000471359	0.01075		ENSBTAG00000007444	3.30364	5.22814	19.8787	0.000128938	0.00260217
														ENSBTAG00000003971	-2.06705	3.6095	16.2152	0.000408732	0.00977389		ENSBTAG00000013079	2.02328	-0.358003	15.745	0.000475858	0.0108057		ENSBTAG00000002804	2.11636	8.57727	19.8405	0.000130432	0.0026092
														ENSBTAG00000044175	-3.10215	3.13987	16.2021	0.000410502	0.00980113		ENSBTAG00000009868	-3.93766	5.19564	15.7363	0.00047908	0.010822		ENSBTAG00000010677	2.55964	5.72225	19.8389	0.000130495	0.0026092
														ENSBTAG00000018843	5.16593	2.31851	16.5455	0.000412295	0.00982109		ENSBTAG00000010774	-2.18375	4.37689	15.7314	0.00047986	0.010822		ENSBTAG00000019585	3.31487	6.35759	19.8318	0.000130774	0.0026092
														ENSBTAG00000017021	-2.53914	5.01396	16.1763	0.00041401	0.00982542		ENSBTAG00000018975	3.73961	0.466765	15.7189	0.000481864	0.010822		ENSBTAG00000003458	-3.1308	4.18424	19.7923	0.00013234	0.00263047
														ENSBTAG00000015118	3.08067	-0.196272	16.13	0.000420379	0.00990213		ENSBTAG00000020194	2.23311	2.78316	15.7008	0.000484785	0.0108523		ENSBTAG00000023002	2.21435	5.691	19.7869	0.000132558	0.00263148
														ENSBTAG00000006419	4.73489	5.67557	16.1086	0.000423363	0.00995754		ENSBTAG00000015595	-3.1095	5.56415	15.6609	0.000491293	0.0109359		ENSBTAG00000021924	4.16879	-1.18872	19.7614	0.000133582	0.0026394
														ENSBTAG00000021673	-3.24319	4.34161	16.0896	0.000426033	0.00998215		ENSBTAG00000004943	-3.20187	4.07534	15.5983	0.000501707	0.0111051		ENSBTAG00000021657	4.66478	1.2319	20.8803	0.000134084	0.00264184
														ENSBTAG00000035776	-2.16486	1.53007	16.0137	0.00043688	0.0101097		ENSBTAG00000024507	3.56291	-1.95338	16.3035	0.000505311	0.0111536		ENSBTAG00000048017	2.86638	0.436518	19.7252	0.000135053	0.00264703
														ENSBTAG00000047491	2.69642	5.16773	16.0015	0.000438637	0.0101355		ENSBTAG00000047347	-2.81856	2.7753	15.5643	0.00050744	0.0111849		ENSBTAG00000014453	-2.42041	5.28077	19.7224	0.000135164	0.00264703
														ENSBTAG00000047680	2.27182	2.69828	15.9582	0.000444977	0.010267		ENSBTAG00000000281	-2.11571	2.35244	15.5145	0.000515989	0.0113259		ENSBTAG00000037794	4.37307	5.10803	20.2026	0.000136302	0.00265854
														ENSBTAG00000047118	3.41641	3.33321	15.9298	0.000449203	0.0103256		ENSBTAG00000004388	4.65066	-0.0510652	15.4959	0.000519234	0.0113813		ENSBTAG00000004824	3.62392	6.60254	19.6912	0.000136448	0.00265854
														ENSBTAG00000044027	2.75387	3.46631	15.9275	0.000449548	0.0103256		ENSBTAG00000012411	2.69417	-1.17608	15.4808	0.000520291	0.0113887		ENSBTAG00000009742	2.8222	4.77471	19.6672	0.000137444	0.00267135
														ENSBTAG00000033292	-4.77633	-0.0546801	15.9061	0.000452746	0.0103704		ENSBTAG00000006882	-3.08589	4.57565	15.478	0.000522351	0.0114179		ENSBTAG00000018571	-4.58654	5.23593	19.6488	0.000138209	0.00268291
														ENSBTAG00000020000	3.93604	3.16546	15.8269	0.000464823	0.01053		ENSBTAG00000010721	-2.35415	6.00503	15.4713	0.000523534	0.011426		ENSBTAG00000019294	3.79762	4.93377	19.6126	0.000139736	0.00270923
														ENSBTAG00000008180	-2.98427	4.25973	15.8195	0.000465976	0.0105359		ENSBTAG00000003838	-2.55081	0.103586	15.4502	0.00052727	0.0114462		ENSBTAG00000003305	2.33331	0.479601	19.5637	0.000141822	0.00272942
														ENSBTAG00000045789	3.45876	7.2395	15.7939	0.000469969	0.0105723		ENSBTAG00000001176	3.66095	7.58129	15.4184	0.000532924	0.0114964		ENSBTAG00000024507	3.94031	-1.95338	20.6187	0.000143573	0.00274319
														ENSBTAG00000046594	-3.15682	2.88573	15.7782	0.00047243	0.0106058		ENSBTAG00000038361	-7.23551	0.461637	15.7231	0.000536717	0.0115077		ENSBTAG00000020573	3.42199	5.37222	19.4829	0.000145347	0.00276001
														ENSBTAG00000019979	2.826	1.5144	15.7665	0.000474282	0.0106201		ENSBTAG00000004988	3.22502	-0.258845	15.373	0.000541149	0.0115567		ENSBTAG00000046911	3.23188	-0.618639	19.4793	0.000145503	0.00276001
														ENSBTAG00000002998	-2.7519	-0.734358	15.7449	0.00047771	0.0106788		ENSBTAG00000037743	3.22965	1.82247	15.3477	0.000545781	0.0116242		ENSBTAG00000048157	2.4151	5.16513	19.4665	0.000146073	0.00276417
														ENSBTAG00000045728	2.8706	7.42122	15.6844	0.000487464	0.0108354		ENSBTAG00000000604	2.01971	9.23824	15.3179	0.000551281	0.0116873		ENSBTAG00000010880	5.53121	7.25606	19.4316	0.000147631	0.00278569
														ENSBTAG00000010766	-2.37212	3.29274	15.6446	0.000493981	0.0109343		ENSBTAG00000046454	6.44053	1.75567	15.2947	0.000555619	0.0117387		ENSBTAG00000040277	-2.15453	0.536122	19.4247	0.000147739	0.00278569
														ENSBTAG00000016450	2.28568	1.22961	15.6446	0.000493992	0.0109343		ENSBTAG00000027715	-2.49783	3.50768	15.2432	0.000565365	0.0118192		ENSBTAG00000023147	2.25059	1.23244	19.403	0.000148921	0.00279913
														ENSBTAG00000001078	2.80762	7.48414	15.5623	0.000507792	0.0111392		ENSBTAG00000018223	4.50973	7.27687	15.2266	0.000568564	0.011828		ENSBTAG00000012370	6.07162	6.08456	19.4017	0.000148984	0.00279913
														ENSBTAG00000021251	2.92779	-1.63838	15.8564	0.000512379	0.011169		ENSBTAG00000016413	2.42007	4.605	15.2201	0.000569813	0.0118326		ENSBTAG00000047823	5.70275	-2.11238	21.1803	0.000150809	0.00282476
														ENSBTAG00000030208	-2.78485	2.28792	15.4145	0.000533637	0.011521		ENSBTAG00000040065	-2.84118	2.8145	15.2019	0.000573319	0.0118898		ENSBTAG00000021526	4.22204	3.26219	19.3601	0.000150885	0.00282476
														ENSBTAG00000008966	2.00238	4.72924	15.3926	0.000537573	0.0115572		ENSBTAG00000029926	6.27035	-1.17853	16.3479	0.000578647	0.0119453		ENSBTAG00000002024	4.63178	-1.44715	19.3012	0.000153618	0.00285896
														ENSBTAG00000011465	3.21911	6.54617	15.3916	0.000537763	0.0115572		ENSBTAG00000046807	2.34359	1.05409	15.1727	0.000579024	0.0119453		ENSBTAG00000009338	2.31736	-0.425166	19.1986	0.000158007	0.00292341
														ENSBTAG00000013008	-2.65263	2.37203	15.3669	0.000542253	0.0116117		ENSBTAG00000009387	4.21136	8.23421	15.1472	0.00058404	0.0120017		ENSBTAG00000015280	-3.37132	4.68833	19.1685	0.000159981	0.00294268
														ENSBTAG00000002882	-2.59747	6.18194	15.3437	0.00054652	0.0116674		ENSBTAG00000019801	3.12562	3.06408	15.1376	0.000585948	0.0120253		ENSBTAG00000047484	4.33906	-1.10981	19.1647	0.000160168	0.00294268
														ENSBTAG00000015919	2.13643	1.69386	15.3389	0.000547401	0.0116674		ENSBTAG00000038598	4.6166	-0.84087	15.8157	0.000589534	0.0120339		ENSBTAG00000026637	2.33527	0.685663	19.1415	0.000161314	0.00295469
														ENSBTAG00000005069	2.32267	5.82338	15.2954	0.000555488	0.0117889		ENSBTAG00000043530	-2.05605	0.546206	15.1169	0.000590083	0.0120339		ENSBTAG00000021118	3.80955	-1.35054	19.1246	0.00016215	0.00296187
														ENSBTAG00000035018	3.45111	0.128828	15.294	0.000555754	0.0117889		ENSBTAG00000015902	2.59197	2.64853	15.0954	0.000594401	0.0120467		ENSBTAG00000015214	5.43448	7.5673	19.1159	0.000162585	0.00296637
														ENSBTAG00000000589	2.91922	3.41173	15.2045	0.000572821	0.0119687		ENSBTAG00000037986	2.19144	-0.266336	15.0839	0.000595915	0.0120467		ENSBTAG00000013531	-2.00048	4.06361	19.109	0.000162927	0.00296914
														ENSBTAG00000018369	4.79101	6.56236	15.1835	0.000576904	0.0120115		ENSBTAG00000004281	2.48976	3.00522	15.0503	0.000603582	0.0121347		ENSBTAG00000000281	-2.37591	2.35244	19.0866	0.000164051	0.00296914
														ENSBTAG00000018643	-2.43491	5.32168	15.1636	0.000580813	0.0120548		ENSBTAG00000037397	2.04149	-0.550305	14.9506	0.000622175	0.0123838		ENSBTAG00000006999	4.01094	7.62222	19.0716	0.000164806	0.00296914
														ENSBTAG00000002613	-2.48427	4.39308	15.1479	0.000583909	0.0120935		ENSBTAG00000002885	3.62582	0.288739	14.931	0.000628592	0.0124629		ENSBTAG00000010179	3.2185	5.87727	19.0446	0.000166179	0.00298185
														ENSBTAG00000011730	3.61567	5.61111	15.1278	0.000587898	0.0121602		ENSBTAG00000008216	-3.48495	7.04048	14.922	0.000630517	0.0124853		ENSBTAG00000000925	2.92067	4.02299	19.0392	0.000166455	0.00298185
														ENSBTAG00000002117	-2.34902	2.59855	15.1194	0.000589573	0.0121629		ENSBTAG00000003640	4.63492	-0.64493	15.2143	0.000633721	0.0125331		ENSBTAG00000014969	3.38156	-0.53481	19.0392	0.000166456	0.00298185
														ENSBTAG00000024492	4.01966	-1.51932	15.37	0.000602168	0.0123582		ENSBTAG00000034366	3.45481	-0.818208	14.9019	0.000634851	0.0125397		ENSBTAG00000018806	-2.10453	3.33019	19.0296	0.000166946	0.00298364
														ENSBTAG00000005938	4.54854	-1.54697	15.0285	0.000608061	0.0123931		ENSBTAG00000016726	-3.05033	3.79447	14.8798	0.000639674	0.0125925		ENSBTAG00000011044	-2.55386	5.39833	18.9139	0.000172999	0.00305046
														ENSBTAG00000018358	2.63007	6.11834	15.0249	0.000608804	0.0123931		ENSBTAG00000000434	2.28933	9.35239	14.8786	0.00063992	0.0125925		ENSBTAG00000001032	5.01716	5.42982	18.9104	0.000173185	0.00305046
														ENSBTAG00000021735	-2.77399	-0.190219	15.0204	0.000609741	0.0123931		ENSBTAG00000020342	2.03171	5.1661	14.866	0.000642684	0.0126155		ENSBTAG00000026986	4.24911	10.5606	18.8992	0.000173787	0.00305424
														ENSBTAG00000007164	-2.08119	-1.06964	15.0065	0.000610154	0.0123931		ENSBTAG00000007445	3.45256	-0.984294	14.8587	0.000644302	0.0126315		ENSBTAG00000014547	3.93353	4.90443	18.8398	0.000177001	0.00308665
														ENSBTAG00000010109	-3.02247	4.04655	15.0128	0.000611321	0.0124009		ENSBTAG00000002644	3.63657	7.01501	14.8326	0.000650075	0.0126817		ENSBTAG00000007654	3.01227	1.77399	18.8138	0.000178425	0.00310056
														ENSBTAG00000017280	3.31503	4.54395	14.9033	0.00063455	0.0127736		ENSBTAG00000005129	-3.10951	4.05939	14.7987	0.000657641	0.0127955		ENSBTAG00000021346	-2.22878	4.00606	18.8074	0.00017878	0.00310056
														ENSBTAG00000046365	5.26928	-1.19479	14.8857	0.000638372	0.0128257		ENSBTAG00000014038	2.19942	0.158722	14.7932	0.000658876	0.0127955		ENSBTAG00000009868	-4.41743	5.19564	18.7797	0.000180316	0.00311676
														ENSBTAG00000019984	-2.00952	5.42564	14.8839	0.000638767	0.0128257		ENSBTAG00000020227	-2.9534	2.34935	14.7863	0.000660441	0.0127955		ENSBTAG00000005299	4.09788	2.68993	18.7728	0.000180702	0.00311676
														ENSBTAG00000033008	3.38379	8.31405	14.8322	0.000650152	0.0129574		ENSBTAG00000007638	-2.48502	1.13327	14.773	0.00066345	0.0128126		ENSBTAG00000043480	-2.62657	-1.00204	18.662	0.000186104	0.00318211
														ENSBTAG00000020080	3.17084	4.10195	14.8308	0.000650476	0.0129574		ENSBTAG00000024647	2.63397	3.99834	14.7643	0.000665425	0.0128126		ENSBTAG00000005163	3.58824	6.6428	18.6587	0.000187199	0.00318703
														ENSBTAG00000031135	4.79477	1.10803	15.0855	0.000661199	0.0131093		ENSBTAG00000019540	-2.77657	2.40827	14.7633	0.000665659	0.0128126		ENSBTAG00000002821	2.90342	3.40649	18.6461	0.000187931	0.00319051
														ENSBTAG00000010444	3.35398	6.02717	14.7279	0.000673791	0.0132781		ENSBTAG00000005965	3.86558	0.296905	14.7631	0.000665718	0.0128126		ENSBTAG00000008752	-2.32577	-0.312041	18.6169	0.000188962	0.00319293
														ENSBTAG00000016754	2.41532	1.27053	14.6624	0.000689104	0.0135267		ENSBTAG00000021480	2.5203	1.05418	14.7539	0.000667814	0.0128373		ENSBTAG00000002298	-2.82968	4.7431	18.6031	0.000190455	0.00320234
														ENSBTAG00000021066	2.64413	5.12912	14.6453	0.000693151	0.0135892		ENSBTAG00000011405	-2.16941	2.9671	14.7085	0.000678274	0.0129438		ENSBTAG00000045603	2.00832	0.385092	18.5926	0.000190614	0.00320234
														ENSBTAG00000001176	3.53656	7.58129	14.5516	0.00071586	0.0138755		ENSBTAG00000009513	-3.21131	4.94013	14.6605	0.000689548	0.0130871		ENSBTAG00000000434	2.58876	9.35239	18.5915	0.000191142	0.00320234
														ENSBTAG00000014038	2.17648	0.158722	14.5489	0.000716548	0.0138755		ENSBTAG00000014992	-2.50316	0.437679	14.6589	0.00068993	0.0130871		ENSBTAG00000014162	3.66	1.11704	18.556	0.000193263	0.00322759
														ENSBTAG00000047155	3.68661	3.18955	14.5414	0.000718396	0.0138943		ENSBTAG00000008329	3.6872	3.88816	14.6426	0.000693808	0.0131134		ENSBTAG00000039686	3.66394	0.946305	18.5033	0.000196461	0.00326717
														ENSBTAG00000003398	-2.43359	2.2497	14.5338	0.000720268	0.0138964		ENSBTAG00000012066	-3.0883	0.950094	14.6148	0.000700456	0.0131641		ENSBTAG00000037381	6.19766	-2.1641	18.9433	0.000197274	0.00327379
														ENSBTAG00000017812	2.74607	1.69718	14.4994	0.000728874	0.0140453		ENSBTAG00000018643	-2.38987	5.32168	14.614	0.000700663	0.0131641		ENSBTAG00000039922	2.19325	0.817237	18.4788	0.000197964	0.00327836
														ENSBTAG00000014199	-3.29896	-1.41321	14.4948	0.000730022	0.0140503		ENSBTAG00000010188	4.49553	-0.233003	15.2605	0.000702382	0.0131807		ENSBTAG00000027715	-2.78736	3.50768	18.455	0.000199435	0.0032889
														ENSBTAG00000021218	4.51047	10.0809	14.4463	0.000742364	0.014184		ENSBTAG00000003305	2.00565	0.479601	14.5848	0.000707724	0.0132253		ENSBTAG00000024647	2.97399	3.99834	18.3742	0.000204523	0.00334485
														ENSBTAG00000013015	3.60919	2.34693	14.4373	0.000744667	0.0141996		ENSBTAG00000047118	3.25136	3.33321	14.5804	0.000708815	0.0132253		ENSBTAG00000010276	-2.63035	3.34853	18.3688	0.000204869	0.00334705
														ENSBTAG00000010640	-2.74493	3.07585	14.4361	0.00074498	0.0141996		ENSBTAG00000040028	4.40533	5.29016	14.5798	0.000708947	0.0132253		ENSBTAG00000046454	7.11245	1.75567	18.3196	0.000208043	0.00338489
														ENSBTAG00000008501	5.8581	-0.905563	16.0317	0.000748758	0.0142544		ENSBTAG00000003329	-2.73643	5.25743	14.5659	0.00071236	0.0132576		ENSBTAG00000021181	-2.95328	4.3398	18.2722	0.000211152	0.00341742
														ENSBTAG00000030338	2.19997	-1.51878	14.369	0.000759552	0.0144078		ENSBTAG00000005607	-2.65936	3.81029	14.5386	0.000719092	0.01332		ENSBTAG00000037539	5.98461	1.09234	18.2708	0.000211241	0.00341742
														ENSBTAG00000021193	-2.82628	3.12664	14.3346	0.000771613	0.0145663		ENSBTAG00000013339	2.34031	0.147891	14.5017	0.000728292	0.0134213		ENSBTAG00000001631	-2.58856	5.50575	18.2693	0.000211342	0.00341742
														ENSBTAG00000002355	3.65895	-0.0268431	14.3277	0.000773456	0.0145665		ENSBTAG00000043951	2.60352	3.05167	14.4862	0.000732186	0.0134539		ENSBTAG00000021730	5.47796	-0.988624	19.2407	0.000211999	0.00342103
														ENSBTAG00000034349	6.39991	-0.880007	15.3657	0.000777648	0.0146153		ENSBTAG00000002882	-2.51841	6.18194	14.4825	0.000733136	0.0134539		ENSBTAG00000008758	-3.42315	6.07049	18.2267	0.000214179	0.00343863
														ENSBTAG00000016026	-2.17614	5.12704	14.3043	0.000779754	0.0146153		ENSBTAG00000005938	4.50382	-1.54697	14.4695	0.000736428	0.0134986		ENSBTAG00000004555	2.24873	-1.06939	18.1974	0.000215019	0.00343962
														ENSBTAG00000040098	-2.24919	0.157467	14.2625	0.00079114	0.0147472		ENSBTAG00000013921	5.20683	8.24239	14.4637	0.000737904	0.01351		ENSBTAG00000011730	4.04081	5.61111	18.2115	0.000215201	0.00343962
														ENSBTAG00000014773	-2.23738	4.21284	14.2611	0.000791538	0.0147472		ENSBTAG00000022714	4.52576	4.1298	14.4288	0.00074685	0.0136263		ENSBTAG00000003640	5.10125	-0.64493	18.5796	0.000219981	0.00348053
														ENSBTAG00000020928	2.96365	2.63421	14.2442	0.000796197	0.0148005		ENSBTAG00000021686	-2.45566	3.77113	14.4207	0.000748949	0.0136489		ENSBTAG00000016754	2.70413	1.27053	18.124	0.000221191	0.00348053
														ENSBTAG00000020887	-2.10205	-0.369625	14.1967	0.000808083	0.014951		ENSBTAG00000048017	2.43416	0.436518	14.3905	0.000756806	0.0137012		ENSBTAG00000018493	-2.68535	3.68891	18.0766	0.000224515	0.00351518
														ENSBTAG00000012834	-2.14268	2.00702	14.1941	0.000810174	0.0149546		ENSBTAG00000033422	3.43229	3.73842	14.3897	0.000757032	0.0137012		ENSBTAG00000007196	-2.60549	9.82335	18.0604	0.000225658	0.00352088
														ENSBTAG00000003314	-2.26976	4.36077	14.1869	0.000812222	0.0149749		ENSBTAG00000047531	2.29934	0.85694	14.3738	0.000761208	0.0137453		ENSBTAG00000012737	-3.28923	1.14342	18.0277	0.000227996	0.00354242
														ENSBTAG00000002826	-3.49092	3.29062	14.0801	0.000843	0.0153984		ENSBTAG00000046325	-2.27268	4.4008	14.3508	0.000767287	0.0137942		ENSBTAG00000020991	3.49479	-0.0454804	18.0207	0.000228499	0.00354242
														ENSBTAG00000007547	3.9609	5.04941	14.0668	0.000846941	0.0154187		ENSBTAG00000015074	3.63647	5.38987	14.3257	0.000774	0.0138815		ENSBTAG00000022058	3.96497	1.61886	17.9589	0.000232992	0.00358466
														ENSBTAG00000011390	3.62833	6.49934	14.0608	0.00084871	0.0154232		ENSBTAG00000015094	3.06817	2.0489	14.3117	0.000777762	0.0139071		ENSBTAG00000042394	-2.67126	-0.371693	17.9586	0.000233011	0.00358466
														ENSBTAG00000008329	3.59844	3.88816	14.0465	0.000852957	0.0154728		ENSBTAG00000014525	4.0114	4.72274	14.3104	0.000778099	0.0139071		ENSBTAG00000004464	-2.37333	1.93525	17.9388	0.00023447	0.00358884
														ENSBTAG00000044204	4.3093	-1.94027	14.6325	0.000859232	0.0155688		ENSBTAG00000000638	-2.48623	3.57884	14.2992	0.000781143	0.0139233		ENSBTAG00000007492	3.15122	1.62118	17.921	0.000235797	0.00359148
														ENSBTAG00000034918	4.43101	-0.0424918	13.991	0.000869674	0.0156502		ENSBTAG00000001343	-3.47254	3.10151	14.2973	0.00078165	0.0139233		ENSBTAG00000009182	4.00617	-1.275	17.8605	0.000240341	0.0036199
														ENSBTAG00000004388	4.38255	-0.0510652	13.8426	0.000916128	0.0161726		ENSBTAG00000021874	-2.20912	2.95714	14.2869	0.000784476	0.0139421		ENSBTAG00000026971	-3.15114	4.03092	17.8254	0.000243026	0.00364932
														ENSBTAG00000021582	-2.00823	5.70787	13.7712	0.000939425	0.0163929		ENSBTAG00000004464	-2.0873	1.93525	14.2498	0.00079464	0.0140302		ENSBTAG00000000589	3.19214	3.41173	17.819	0.000243524	0.00364985
														ENSBTAG00000047823	4.9809	-2.11238	14.6968	0.000953394	0.016571		ENSBTAG00000004085	-2.5101	4.11627	14.205	0.000807128	0.0141692		ENSBTAG00000019824	-3.01047	3.35404	17.8154	0.000243795	0.00365045
														ENSBTAG00000008497	2.60481	2.16018	13.7243	0.000955054	0.0165816		ENSBTAG00000025136	4.04162	2.45484	14.1816	0.000813718	0.014239		ENSBTAG00000007415	2.29082	1.21252	17.7942	0.000245435	0.00366294
														ENSBTAG00000015293	-2.1162	1.90501	13.6925	0.000965848	0.0166587		ENSBTAG00000040244	-3.3524	-1.74298	14.1777	0.00081381	0.014239		ENSBTAG00000005234	2.83287	1.73737	17.7927	0.000245558	0.00366294
														ENSBTAG00000001344	3.26898	0.429528	13.6832	0.000968996	0.0166587		ENSBTAG00000002224	-2.60524	5.60656	14.1602	0.000819798	0.0142886		ENSBTAG00000019801	3.42283	3.06408	17.756	0.000248425	0.00369872
														ENSBTAG00000017509	3.15784	6.52222	13.6036	0.00099663	0.0169858		ENSBTAG00000015067	4.40638	-1.27192	14.4345	0.000821323	0.0142886		ENSBTAG00000038275	-3.99988	0.58356	17.7411	0.000249601	0.00370923
														ENSBTAG00000002880	2.92543	3.36641	13.5693	0.00100882	0.0171011		ENSBTAG00000000328	6.55007	-2.12018	14.4238	0.00082429	0.0143016		ENSBTAG00000007746	2.21707	1.28098	17.6972	0.000253106	0.0037472
														ENSBTAG00000004877	-2.33724	1.37989	13.5608	0.00101186	0.0171159		ENSBTAG00000005895	-3.29971	1.51217	14.1243	0.000830124	0.0143494		ENSBTAG00000018519	3.98437	3.02115	17.6904	0.000253652	0.00375176
														ENSBTAG00000048042	-2.34308	4.33489	13.5237	0.00102525	0.0172499		ENSBTAG00000016754	2.36954	1.27053	14.1055	0.000835582	0.0144122		ENSBTAG00000005945	2.27678	-0.311572	17.6674	0.000255093	0.00376603
														ENSBTAG00000016424	-5.65184	0.0313484	13.506	0.00103172	0.0173403		ENSBTAG00000037381	5.62946	-2.1641	14.3609	0.000841928	0.0144427		ENSBTAG00000008507	-2.36536	5.23037	17.5537	0.000264924	0.00386884
														ENSBTAG00000040053	2.93582	2.89537	13.4853	0.00103931	0.0174271		ENSBTAG00000014602	2.19849	1.04791	14.0776	0.000843746	0.0144577		ENSBTAG00000019792	3.20778	1.1017	17.5532	0.000264965	0.00386884
														ENSBTAG00000039861	5.02288	2.99533	13.4766	0.00104253	0.0174477		ENSBTAG00000046696	-3.55417	0.379568	14.0725	0.00084524	0.0144577		ENSBTAG00000004860	3.58647	-0.29614	17.5525	0.000265018	0.00386884
														ENSBTAG00000018146	-2.16352	0.390264	13.4016	0.00107069	0.0177296		ENSBTAG00000007698	-2.2475	2.7539	14.0715	0.00084555	0.0144577		ENSBTAG00000018647	-2.23452	0.870353	17.5337	0.000266614	0.00387449
														ENSBTAG00000008676	2.37369	-0.934431	13.3928	0.00107282	0.0177296		ENSBTAG00000047823	5.0613	-2.11238	15.062	0.000851261	0.0145396		ENSBTAG00000002355	4.04875	-0.0268431	17.4611	0.000272862	0.0039435
														ENSBTAG00000045588	5.04993	3.38487	13.3959	0.00107285	0.0177296		ENSBTAG00000046365	5.14378	-1.19479	14.0192	0.000861131	0.0146606		ENSBTAG00000021048	-2.14294	7.39369	17.4579	0.000273139	0.00394389
														ENSBTAG00000046601	-3.09836	2.12609	13.3885	0.00107569	0.0177578		ENSBTAG00000024726	-3.13017	4.69964	13.9747	0.00087465	0.0148277		ENSBTAG00000018375	4.58905	-0.425034	17.8518	0.000274382	0.00394904
														ENSBTAG00000026067	4.32158	-0.836201	13.6163	0.00108497	0.0178737		ENSBTAG00000046601	-3.22222	2.12609	13.9544	0.000880879	0.0149004		ENSBTAG00000023216	2.94636	1.03241	17.4434	0.000274406	0.00394904
														ENSBTAG00000008013	3.3973	-0.238279	13.5804	0.00109849	0.0180216		ENSBTAG00000039967	-3.73318	-1.39824	13.9442	0.000884029	0.0149096		ENSBTAG00000021993	2.54256	-0.531358	17.4343	0.000275206	0.00394904
														ENSBTAG00000014628	5.05572	1.7656	13.3243	0.00110057	0.0180365		ENSBTAG00000018300	3.22197	1.61807	13.9382	0.000885883	0.0149096		ENSBTAG00000019658	2.15945	4.0133	17.3915	0.000278999	0.00398456
														ENSBTAG00000001343	-3.28862	3.10151	13.3202	0.00110216	0.0180439		ENSBTAG00000019428	3.53134	-0.5632	13.9319	0.000887842	0.0149179		ENSBTAG00000025903	-2.00868	4.26293	17.3888	0.000279237	0.00398456
														ENSBTAG00000006999	3.23317	7.62222	13.2937	0.00111265	0.0181779		ENSBTAG00000000960	3.05595	-0.0405244	13.9206	0.00089137	0.0149179		ENSBTAG00000012066	-3.44642	0.950094	17.3665	0.00028124	0.00399507
														ENSBTAG00000020105	4.50272	1.59419	13.5331	0.00111656	0.0182229		ENSBTAG00000046166	3.33065	0.513633	13.9082	0.00089525	0.014967		ENSBTAG00000018223	4.90451	7.27687	17.3548	0.000282292	0.00400281
														ENSBTAG00000021162	-2.24449	6.79847	13.1938	0.0011531	0.0186457		ENSBTAG00000006551	-3.20874	3.8634	13.8732	0.000906316	0.0150612		ENSBTAG00000007799	-3.06893	3.49905	17.3326	0.000284305	0.00402774
														ENSBTAG00000021120	3.60999	6.56314	13.1871	0.00115587	0.0186714		ENSBTAG00000000925	2.45141	4.02299	13.8719	0.000906742	0.0150612		ENSBTAG00000033422	3.82063	3.73842	17.3231	0.000285172	0.00402917
														ENSBTAG00000029926	5.9172	-1.17853	14.0242	0.00118158	0.0189702		ENSBTAG00000019504	4.17026	2.25558	13.8498	0.000913792	0.0150612		ENSBTAG00000031889	-3.2657	-1.62457	17.3065	0.000286044	0.00403599
														ENSBTAG00000046766	-2.29076	1.49678	13.1114	0.00118765	0.019029		ENSBTAG00000001414	3.15432	3.03632	13.8406	0.000916753	0.0150612		ENSBTAG00000023938	-3.46924	4.88689	17.2903	0.000288192	0.0040573
														ENSBTAG00000007860	-3.16227	5.93237	13.1069	0.00118955	0.01904		ENSBTAG00000015086	2.96664	3.89262	13.8256	0.000921592	0.0150877		ENSBTAG00000007237	-3.00589	5.23682	17.2541	0.000291552	0.00408456
														ENSBTAG00000020141	3.125	1.52685	13.0604	0.00120961	0.0193165		ENSBTAG00000000987	2.82013	5.70876	13.8027	0.000929059	0.0151616		ENSBTAG00000000638	-2.76607	3.57884	17.2472	0.000292198	0.00408456
														ENSBTAG00000002620	-2.60191	2.30757	13.0043	0.00123424	0.0195493		ENSBTAG00000014380	-2.01797	6.16178	13.762	0.000942455	0.0153188		ENSBTAG00000017866	3.90561	2.77318	17.242	0.000292692	0.00408784
														ENSBTAG00000005607	-2.47503	3.81029	12.9368	0.00126464	0.0199144		ENSBTAG00000046714	-3.13114	-1.96666	13.7499	0.000943474	0.0153188		ENSBTAG00000023144	2.97683	-1.20458	17.2245	0.00029434	0.00409637
														ENSBTAG00000009774	5.88538	-0.206522	13.7457	0.00129168	0.0202469		ENSBTAG00000002931	3.60285	4.53457	13.7306	0.000952933	0.015429		ENSBTAG00000019953	3.31839	0.869872	17.2212	0.000294648	0.00409704
														ENSBTAG00000024449	-3.36225	6.05499	12.8549	0.00130259	0.0203783		ENSBTAG00000019792	2.81001	1.1017	13.6957	0.000964737	0.0155046		ENSBTAG00000015074	4.06122	5.38987	17.2106	0.000295657	0.00410438
														ENSBTAG00000013026	-2.4143	-1.38019	12.8503	0.00130286	0.0203783		ENSBTAG00000013147	-3.83939	2.12867	13.6922	0.000965946	0.0155082		ENSBTAG00000004281	2.67881	3.00522	17.2102	0.000295696	0.00410438
														ENSBTAG00000031711	-2.26283	3.44309	12.8048	0.00132639	0.0205995		ENSBTAG00000035013	-3.04037	1.91831	13.6687	0.000973967	0.0155916		ENSBTAG00000002931	4.10637	4.53457	17.1329	0.00030314	0.00417465
														ENSBTAG00000015093	3.02517	-1.00162	12.7894	0.00133381	0.0206055		ENSBTAG00000004322	2.0214	4.50601	13.658	0.000977654	0.015605		ENSBTAG00000008934	-3.08379	5.44028	17.0402	0.000312331	0.00425786
														ENSBTAG00000005150	-2.46641	1.26284	12.7888	0.00133407	0.0206055		ENSBTAG00000002117	-2.22947	2.59855	13.6531	0.00097937	0.0156125		ENSBTAG00000047118	3.55225	3.33321	17.0393	0.00031242	0.00425786
														ENSBTAG00000001297	2.69119	-0.73515	12.7527	0.00135168	0.0207714		ENSBTAG00000047054	-2.03502	-0.804809	13.6273	0.000984835	0.0156639		ENSBTAG00000021686	-2.69782	3.77113	17.0323	0.00031313	0.0042603
														ENSBTAG00000016255	-2.23593	2.08373	12.7385	0.00135866	0.0208278		ENSBTAG00000005010	-2.30361	2.89162	13.6117	0.00099378	0.015731		ENSBTAG00000018775	-2.33016	6.27605	17.0106	0.00031533	0.00427038
														ENSBTAG00000012066	-2.81995	0.950094	12.7371	0.00135931	0.0208278		ENSBTAG00000011730	3.39615	5.61111	13.5889	0.00100184	0.0158269		ENSBTAG00000000817	2.33492	4.41011	16.9944	0.000316985	0.00427941
														ENSBTAG00000006835	2.31822	4.29712	12.7083	0.00137361	0.0210264		ENSBTAG00000038173	-3.43081	-1.45477	13.5161	0.00102803	0.0161437		ENSBTAG00000003398	-2.67847	2.2497	16.9594	0.00032059	0.00430234
														ENSBTAG00000000698	2.36318	5.90931	12.6983	0.00137859	0.0210415		ENSBTAG00000021009	3.26168	6.64133	13.4973	0.00103491	0.016233		ENSBTAG00000004988	3.38697	-0.258845	16.9506	0.000321505	0.00430762
														ENSBTAG00000015094	2.86932	2.0489	12.6831	0.00138625	0.0210916		ENSBTAG00000018375	4.04774	-0.425034	13.7466	0.00103746	0.016233		ENSBTAG00000011459	2.40071	-0.42547	16.9414	0.000322084	0.00430773
														ENSBTAG00000009513	-2.93921	4.94013	12.6795	0.00138807	0.0210916		ENSBTAG00000046332	2.82185	11.1183	13.4865	0.00103886	0.016233		ENSBTAG00000014011	2.84546	1.41161	16.9294	0.000323711	0.00431851
														ENSBTAG00000020573	2.67816	5.37222	12.6555	0.00140019	0.0211689		ENSBTAG00000039462	-3.11	4.81919	13.4787	0.00104175	0.0162459		ENSBTAG00000008013	3.84563	-0.238279	17.2748	0.000327896	0.00434942
														ENSBTAG00000031889	-2.51587	-1.62457	12.6196	0.00141655	0.0212729		ENSBTAG00000020000	3.58353	3.16546	13.4308	0.00105963	0.0164597		ENSBTAG00000018399	-2.34672	3.95689	16.8679	0.000330223	0.00436484
														ENSBTAG00000000752	-2.3189	3.59497	12.6141	0.00142147	0.0212729		ENSBTAG00000003314	-2.20547	4.36077	13.4162	0.00106513	0.0165289		ENSBTAG00000012184	-3.29806	2.65433	16.818	0.000335608	0.00441535
														ENSBTAG00000007823	3.29572	2.41415	12.6133	0.00142186	0.0212729		ENSBTAG00000018267	3.6967	5.43047	13.3277	0.00109925	0.0168594		ENSBTAG00000044204	4.66616	-1.94027	17.6619	0.000335726	0.00441535
														ENSBTAG00000013798	-2.66347	0.0669412	12.5591	0.00145025	0.0216251		ENSBTAG00000046766	-2.33672	1.49678	13.3166	0.00110359	0.0168932		ENSBTAG00000015228	2.35373	-0.909597	16.7681	0.000340029	0.0044497
														ENSBTAG00000046810	-5.84143	-1.8189	12.7772	0.00145383	0.0216251		ENSBTAG00000005456	-2.91982	3.95957	13.2816	0.00111748	0.0170561		ENSBTAG00000004022	3.31618	-1.39156	16.7184	0.000346645	0.00450503
														ENSBTAG00000010048	-2.63605	2.18382	12.5385	0.00146119	0.0216938		ENSBTAG00000026768	-3.42775	2.57051	13.2601	0.00112608	0.0171212		ENSBTAG00000015118	3.13972	-0.196272	16.7168	0.000346826	0.00450503
														ENSBTAG00000011803	4.08614	11.7072	12.5244	0.00146872	0.0217035		ENSBTAG00000010986	2.4816	2.23569	13.2474	0.00113121	0.0171535		ENSBTAG00000033316	3.47619	-1.17104	16.6977	0.000348993	0.0045146
														ENSBTAG00000000960	2.88879	-0.0405244	12.5196	0.00147129	0.0217211		ENSBTAG00000014547	3.19849	4.90443	13.2115	0.00114581	0.0172793		ENSBTAG00000005825	-3.3196	2.65142	16.6827	0.0003507	0.00453297
														ENSBTAG00000021009	3.12146	6.64133	12.5111	0.00147585	0.0217328		ENSBTAG00000047957	2.82393	6.43191	13.1992	0.00115086	0.0173309		ENSBTAG00000016359	2.7401	-1.30866	16.6733	0.000351032	0.00453355
														ENSBTAG00000023289	-2.10974	-0.390702	12.4054	0.00153404	0.0223754		ENSBTAG00000010109	-2.8136	4.04655	13.192	0.00115382	0.0173591		ENSBTAG00000009137	4.74676	-1.49457	17.0376	0.000353085	0.00454517
														ENSBTAG00000017409	-2.18528	1.36472	12.3613	0.00155901	0.0226142		ENSBTAG00000021968	2.14717	-0.154275	13.1681	0.00116321	0.0174669		ENSBTAG00000007638	-2.66134	1.13327	16.6327	0.000356456	0.00456994
														ENSBTAG00000012710	4.76335	-1.98727	12.3353	0.00157393	0.0227471		ENSBTAG00000017446	-3.16323	4.01994	13.1566	0.00116854	0.0174949		ENSBTAG00000002644	3.89409	7.01501	16.6155	0.000358464	0.0045845
														ENSBTAG00000046454	5.73894	1.75567	12.3035	0.00159247	0.0229309		ENSBTAG00000019496	-2.22218	3.49537	13.1156	0.00118585	0.0176311		ENSBTAG00000004943	-3.31361	4.07534	16.5542	0.000365704	0.00464918
														ENSBTAG00000002444	-3.62967	8.19152	12.2564	0.00162029	0.0231827		ENSBTAG00000007732	2.88665	6.24144	13.0871	0.00119805	0.0177227		ENSBTAG00000018167	3.10607	4.70523	16.5528	0.000365878	0.00464918
														ENSBTAG00000001474	-2.09884	-0.530268	12.2532	0.0016217	0.0231827		ENSBTAG00000008180	-2.68134	4.25973	13.0835	0.00119958	0.0177227		ENSBTAG00000011500	4.61369	8.51407	16.515	0.000370422	0.00468055
														ENSBTAG00000009533	2.42284	0.993454	12.2436	0.00162792	0.0232295		ENSBTAG00000009618	-3.07944	3.01237	13.0604	0.00120961	0.0177912		ENSBTAG00000018603	2.21931	3.05009	16.4503	0.000378355	0.00472779
														ENSBTAG00000024497	3.47346	-0.259403	12.3801	0.00167416	0.0236964		ENSBTAG00000020061	3.37046	-0.936104	13.0512	0.00121362	0.0177985		ENSBTAG00000002331	-3.53576	4.43896	16.4409	0.000379522	0.00473487
														ENSBTAG00000008021	4.2474	-0.833058	12.1545	0.00168226	0.023726		ENSBTAG00000018167	2.71997	4.70523	13.048	0.00121501	0.0177985		ENSBTAG00000011547	4.60319	0.119396	16.4354	0.000380208	0.00473743
														ENSBTAG00000014466	5.13956	-1.08123	12.3409	0.00169777	0.0238539		ENSBTAG00000010179	2.59766	5.87727	13.0377	0.00121952	0.0178373		ENSBTAG00000015875	-3.16096	3.44476	16.4044	0.000384092	0.00476552
														ENSBTAG00000031573	2.92694	3.63192	12.1042	0.0017138	0.0239993		ENSBTAG00000010677	2.03635	5.72225	13.0215	0.00122663	0.0179082		ENSBTAG00000010024	2.6178	-1.3358	16.3161	0.000394223	0.00484551
														ENSBTAG00000009198	2.58305	0.800075	12.0463	0.00175093	0.0243113		ENSBTAG00000010991	5.33784	5.33088	12.9963	0.00123779	0.0180376		ENSBTAG00000034674	3.58543	-1.34833	16.2856	0.000399367	0.00488326
														ENSBTAG00000018142	-2.76132	3.29868	12.0454	0.00175148	0.0243113		ENSBTAG00000001443	4.07812	-0.267869	12.9836	0.00124345	0.0181034		ENSBTAG00000014132	2.74683	3.71227	16.2849	0.000399461	0.00488326
														ENSBTAG00000001187	-2.27882	-1.93108	12.0248	0.00175965	0.0243818		ENSBTAG00000033292	-4.17445	-0.0546801	12.9594	0.00125436	0.0182286		ENSBTAG00000005236	5.55534	-1.90871	17.5839	0.000403695	0.00492739
														ENSBTAG00000011343	2.49913	-0.0780401	11.991	0.00178716	0.0246547		ENSBTAG00000044091	3.10348	-1.99614	12.9379	0.00126292	0.0182509		ENSBTAG00000038496	4.46513	-1.69875	16.2452	0.00040472	0.00492956
														ENSBTAG00000007109	2.61139	4.99906	11.9521	0.00181314	0.0249694		ENSBTAG00000047807	-2.82349	1.41101	12.9398	0.00126327	0.0182509		ENSBTAG00000002576	3.14859	0.0995023	16.2445	0.00040481	0.00492956
														ENSBTAG00000038361	-4.61209	0.461637	12.1412	0.00182401	0.0250754		ENSBTAG00000007492	2.63638	1.62118	12.931	0.00126725	0.0182509		ENSBTAG00000007281	2.13313	2.98515	16.2303	0.000406711	0.00494508
														ENSBTAG00000020263	-3.25888	-1.03806	11.8994	0.00184898	0.0253084		ENSBTAG00000017844	-2.32966	3.1554	12.9262	0.00126945	0.0182509		ENSBTAG00000011784	2.93144	0.562547	16.2152	0.000408738	0.00496208
														ENSBTAG00000017884	3.00935	-1.08028	11.8859	0.00185835	0.0254102		ENSBTAG00000008676	2.341	-0.934431	12.8865	0.0012864	0.0182653		ENSBTAG00000022714	4.85563	4.1298	16.1946	0.000411521	0.00498819
														ENSBTAG00000030523	2.6452	-1.59862	11.8732	0.00186564	0.0254482		ENSBTAG00000017026	-3.06134	2.79694	12.889	0.00128663	0.0182653		ENSBTAG00000006404	-2.06012	4.42732	16.1803	0.000413463	0.00500021
														ENSBTAG00000047174	3.02489	7.07967	11.8634	0.00187395	0.0255174		ENSBTAG00000001936	2.61615	-0.61248	12.8847	0.00128863	0.0182653		ENSBTAG00000039402	2.16782	-0.425833	16.0989	0.000423884	0.00509843
														ENSBTAG00000001058	2.18218	5.55213	11.8473	0.00188525	0.025627		ENSBTAG00000009035	-2.87074	4.16656	12.8832	0.00128934	0.0182653		ENSBTAG00000019743	-2.81677	3.81665	16.1006	0.000424492	0.00509843
														ENSBTAG00000013569	-3.46466	-1.17175	11.8447	0.00188708	0.0256293		ENSBTAG00000007860	-3.13828	5.93237	12.8783	0.00129161	0.0182653		ENSBTAG00000019726	4.50818	-0.828723	16.0906	0.000425894	0.00510749
														ENSBTAG00000015773	-2.34155	-0.839485	11.8419	0.00188902	0.0256293		ENSBTAG00000039356	5.40366	-0.240503	13.6809	0.0013189	0.0186013		ENSBTAG00000002978	3.2197	-0.543223	16.0726	0.000428438	0.00511675
														ENSBTAG00000005679	3.43001	0.0916946	11.8352	0.00189371	0.0256483		ENSBTAG00000020661	3.15368	4.08402	12.7952	0.00133102	0.0187387		ENSBTAG00000002914	2.35352	1.63689	16.0714	0.000428611	0.00511675
														ENSBTAG00000011720	2.97195	-0.269728	11.8289	0.00189819	0.0256483		ENSBTAG00000002444	-3.72064	8.19152	12.7523	0.00135188	0.0189816		ENSBTAG00000018134	4.10273	-1.82536	16.0598	0.000430252	0.0051184
														ENSBTAG00000016973	2.90665	1.79157	11.8166	0.00190691	0.0257221		ENSBTAG00000004877	-2.27536	1.37989	12.7481	0.00135391	0.0189932		ENSBTAG00000031135	5.02563	1.10803	16.3925	0.000432844	0.00514394
														ENSBTAG00000014335	4.79392	0.548421	11.809	0.00191232	0.0257647		ENSBTAG00000007047	3.09166	-1.15054	12.7443	0.00135579	0.0190027		ENSBTAG00000019772	2.23334	3.68351	16.0026	0.000438487	0.00519145
														ENSBTAG00000002849	2.39819	-0.664516	11.6966	0.00199433	0.0265608		ENSBTAG00000044204	4.15011	-1.94027	13.2049	0.00137841	0.0192513		ENSBTAG00000000580	2.68989	-0.0314863	15.9883	0.000440568	0.00520437
														ENSBTAG00000014581	2.26831	5.08278	11.672	0.0020128	0.0267616		ENSBTAG00000045728	2.54646	7.42122	12.6654	0.00139517	0.0194167		ENSBTAG00000031573	3.4275	3.63192	15.9848	0.00044108	0.00520652
														ENSBTAG00000000478	2.41428	0.136159	11.5731	0.00208883	0.0274259		ENSBTAG00000032372	-2.17581	3.7262	12.637	0.00140965	0.0195492		ENSBTAG00000011766	4.85731	2.86894	15.9701	0.000443228	0.00521627
														ENSBTAG00000006951	2.71257	3.41341	11.5438	0.00211203	0.027575		ENSBTAG00000003774	3.06921	-1.8868	12.5817	0.00143726	0.0198624		ENSBTAG00000014239	-3.43608	3.8106	15.9652	0.000443953	0.00522028
														ENSBTAG00000021823	2.89651	4.16186	11.5398	0.00211519	0.0275884		ENSBTAG00000004428	-2.04596	7.2442	12.5837	0.00143726	0.0198624		ENSBTAG00000035018	3.53003	0.128828	15.947	0.000446646	0.00523361
														ENSBTAG00000016142	2.19301	3.13445	11.5145	0.00213543	0.0277149		ENSBTAG00000004840	3.62158	8.83059	12.5712	0.00144383	0.019894		ENSBTAG00000046744	-2.85663	0.493523	15.9467	0.00044669	0.00523361
														ENSBTAG00000011275	-3.18556	-1.72958	11.508	0.00214061	0.0277559		ENSBTAG00000035319	-2.46301	4.32147	12.5579	0.00145086	0.019894		ENSBTAG00000012319	4.53166	3.62209	15.9417	0.000447429	0.00523837
														ENSBTAG00000009752	2.89197	1.66416	11.5062	0.00214211	0.0277559		ENSBTAG00000012285	3.05503	-0.0131011	12.5558	0.00145199	0.019894		ENSBTAG00000015902	2.66975	2.64853	15.9392	0.0004478	0.00523883
														ENSBTAG00000017844	-2.16536	3.1554	11.4781	0.00216489	0.0279365		ENSBTAG00000021673	-2.80963	4.34161	12.5555	0.00145215	0.019894		ENSBTAG00000001176	3.73127	7.58129	15.9144	0.000451505	0.00527046
														ENSBTAG00000006563	2.78862	6.00494	11.4552	0.00218367	0.0280618		ENSBTAG00000012834	-2.00942	2.00702	12.5333	0.00146396	0.0200036		ENSBTAG00000014508	3.78533	-1.98238	16.2487	0.000452809	0.00527787
														ENSBTAG00000018493	-2.05719	3.68891	11.4528	0.00218559	0.0280618		ENSBTAG00000013008	-2.36898	2.37203	12.5169	0.0014727	0.0200883		ENSBTAG00000009983	-2.29493	4.95458	15.8995	0.000453743	0.00527961
														ENSBTAG00000021707	3.34776	0.620038	11.5681	0.00224654	0.0286389		ENSBTAG00000014162	2.95518	1.11704	12.5122	0.00147524	0.0201056		ENSBTAG00000025642	2.03762	4.30029	15.8958	0.000454297	0.00527961
														ENSBTAG00000008394	4.35063	3.89118	11.3691	0.00225581	0.0287338		ENSBTAG00000016619	-2.7817	2.63532	12.5012	0.00148118	0.0201231		ENSBTAG00000014525	4.27415	4.72274	15.8893	0.000455284	0.0052833
														ENSBTAG00000002931	3.22485	4.53457	11.3237	0.00229488	0.0291139		ENSBTAG00000047484	3.54099	-1.10981	12.5004	0.00148163	0.0201231		ENSBTAG00000005782	3.2307	-1.79144	15.8488	0.000461007	0.00532232
														ENSBTAG00000020269	2.32343	-1.74077	11.2469	0.00235637	0.0295379		ENSBTAG00000005877	2.21322	-0.53041	12.469	0.00149872	0.0202558		ENSBTAG00000016413	2.47342	4.605	15.8411	0.000462645	0.0053226
														ENSBTAG00000038048	2.34707	3.2274	11.2465	0.00236307	0.0295647		ENSBTAG00000017041	2.10331	-0.541743	12.4529	0.00150609	0.0202635		ENSBTAG00000011465	3.27307	6.54617	15.8368	0.000463307	0.0053226
														ENSBTAG00000014992	-2.12726	0.437679	11.2435	0.0023657	0.0295647		ENSBTAG00000031889	-2.57404	-1.62457	12.449	0.00150756	0.0202635		ENSBTAG00000046594	-3.19163	2.88573	15.8362	0.000463392	0.0053226
														ENSBTAG00000002680	-2.40659	0.716024	11.1831	0.00242067	0.0300338		ENSBTAG00000013183	2.6649	2.64214	12.4507	0.00150878	0.0202635		ENSBTAG00000046365	5.41462	-1.19479	15.8316	0.000464109	0.00532695
														ENSBTAG00000015347	-2.74728	0.344998	11.0846	0.00251317	0.0307931		ENSBTAG00000002620	-2.55247	2.30757	12.3992	0.0015375	0.0204594		ENSBTAG00000011814	-2.15289	2.16408	15.8267	0.000464859	0.00532782
														ENSBTAG00000046158	4.35373	4.7735	11.0706	0.00252664	0.0309111		ENSBTAG00000010741	2.38149	9.422	12.3095	0.00158892	0.0208941		ENSBTAG00000016267	2.03399	7.10933	15.8062	0.000468043	0.00534717
														ENSBTAG00000021484	-2.26694	0.815477	11.0676	0.0025295	0.0309222		ENSBTAG00000021120	3.46522	6.56314	12.3043	0.00159197	0.0209022		ENSBTAG00000004206	4.37106	3.04994	15.8049	0.000468246	0.00534717
														ENSBTAG00000005708	-2.36912	3.30838	11.0301	0.00256607	0.0311043		ENSBTAG00000018493	-2.15283	3.68891	12.2833	0.0016043	0.0210248		ENSBTAG00000038490	4.89709	-2.49476	17.71	0.000468711	0.00534717
														ENSBTAG00000021480	2.15758	1.05418	10.9752	0.00262053	0.0315463		ENSBTAG00000021162	-2.15665	6.79847	12.2439	0.00162775	0.0211956		ENSBTAG00000016171	2.19896	-1.24675	15.7765	0.000470645	0.00535796
														ENSBTAG00000037381	5.1077	-2.1641	11.1461	0.00262559	0.0315591		ENSBTAG00000020269	2.42696	-1.74077	12.2211	0.00163646	0.0212729		ENSBTAG00000019327	4.73489	3.01695	15.7777	0.000472509	0.00536998
														ENSBTAG00000038275	-2.84378	0.58356	10.949	0.00264693	0.0316858		ENSBTAG00000010345	4.21741	1.97693	12.2273	0.00163773	0.0212729		ENSBTAG00000015784	4.75276	-2.24759	16.4834	0.000479317	0.00541487
														ENSBTAG00000038277	-3.33238	-0.0811917	10.8997	0.00269747	0.0322511		ENSBTAG00000019726	3.9673	-0.828723	12.2088	0.0016489	0.0213416		ENSBTAG00000007148	2.42362	1.24271	15.7062	0.000483923	0.0054552
														ENSBTAG00000006780	2.01159	-1.26511	10.8797	0.00271495	0.032411		ENSBTAG00000010738	3.54307	-2.35417	12.6126	0.00168757	0.0215828		ENSBTAG00000014614	-2.15684	10.707	15.6981	0.000485225	0.00545933
														ENSBTAG00000032531	2.948	2.49536	10.8642	0.00273446	0.0325516		ENSBTAG00000008259	2.24951	-0.954552	12.1276	0.00169739	0.0216402		ENSBTAG00000017528	5.4257	-2.25961	18.4049	0.000486029	0.00545943
														ENSBTAG00000015700	2.89852	1.22581	10.8637	0.00273497	0.0325516		ENSBTAG00000021730	4.44986	-0.988624	12.5664	0.0017147	0.0217879		ENSBTAG00000033299	2.11088	4.47377	15.6896	0.00048661	0.00545978
														ENSBTAG00000021132	2.71089	6.25307	10.8522	0.00274705	0.032597		ENSBTAG00000019262	-3.04465	6.52892	12.0997	0.00171664	0.0217879		ENSBTAG00000015441	-3.79874	6.41222	15.6887	0.000486751	0.00545978
														ENSBTAG00000009218	-2.37286	7.19321	10.8162	0.00278533	0.0329521		ENSBTAG00000015396	2.40593	6.03551	12.086	0.00172536	0.0218361		ENSBTAG00000006972	-2.22114	3.87333	15.6807	0.000488056	0.00546359
														ENSBTAG00000006273	-2.41107	-0.316452	10.8074	0.00279486	0.0329906		ENSBTAG00000000598	2.08471	8.313	12.0551	0.00174522	0.0219993		ENSBTAG00000012605	2.04998	1.93212	15.631	0.000496243	0.00552766
														ENSBTAG00000001920	-2.76807	2.83423	10.7792	0.00282533	0.0332013		ENSBTAG00000011390	3.31117	6.49934	12.0375	0.00175659	0.0220792		ENSBTAG00000013183	3.02187	2.64214	15.6177	0.000498456	0.00553209
														ENSBTAG00000007206	2.11904	4.69355	10.7712	0.00283408	0.0332794		ENSBTAG00000021139	-4.25607	-1.18169	12.0345	0.00175856	0.0220792		ENSBTAG00000015341	2.90815	1.99792	15.608	0.000500071	0.00553215
														ENSBTAG00000000590	-2.22116	4.0838	10.7161	0.00289496	0.0337403		ENSBTAG00000032007	-2.23798	4.81406	12.0195	0.00176838	0.0221533		ENSBTAG00000040028	4.59278	5.29016	15.6025	0.00050099	0.00553297
														ENSBTAG00000001139	2.04389	3.47775	10.6902	0.00292408	0.0339779		ENSBTAG00000017280	2.93385	4.54395	12.0016	0.00178014	0.0222616		ENSBTAG00000019428	3.74129	-0.5632	15.5932	0.000502557	0.00554253
														ENSBTAG00000013802	2.935	1.94273	10.6722	0.00294443	0.0340932		ENSBTAG00000020489	2.31325	2.26025	11.9901	0.00178779	0.0222866		ENSBTAG00000043991	2.88356	-0.00697888	15.571	0.000506312	0.0055636
														ENSBTAG00000008739	-2.05232	3.61233	10.6303	0.00299252	0.0344433		ENSBTAG00000026796	5.15687	-0.891246	12.7431	0.00179234	0.0223081		ENSBTAG00000012411	2.69586	-1.17608	15.5562	0.000507286	0.00556534
														ENSBTAG00000046769	-3.34933	-1.81784	10.6288	0.00299431	0.0344433		ENSBTAG00000000502	-5.54481	-1.86185	12.1845	0.00179579	0.0223158		ENSBTAG00000019602	2.38322	-0.341773	15.5585	0.000508429	0.00556837
														ENSBTAG00000007450	2.70061	4.46652	10.6145	0.00301092	0.0345587		ENSBTAG00000014435	-2.33373	3.93879	11.9154	0.00183803	0.0227512		ENSBTAG00000006520	3.85227	-0.678824	15.5519	0.00050956	0.00557689
														ENSBTAG00000005862	-2.09028	5.76303	10.5414	0.00309755	0.0352964		ENSBTAG00000018432	3.434	-0.255221	11.8875	0.00185721	0.0228988		ENSBTAG00000011635	-2.61202	2.48829	15.5422	0.000511218	0.00558824
														ENSBTAG00000014596	2.6654	2.80215	10.4784	0.00317422	0.0359624		ENSBTAG00000014508	3.33198	-1.98238	12.0519	0.00188274	0.0230694		ENSBTAG00000015595	-3.0928	5.56415	15.5361	0.000512264	0.00559097
														ENSBTAG00000012074	-2.04361	1.42749	10.4466	0.0032138	0.0362556		ENSBTAG00000008553	3.75812	0.46149	11.8413	0.0018894	0.0230794		ENSBTAG00000008553	4.35173	0.46149	15.5289	0.000513513	0.0055953
														ENSBTAG00000014525	3.33532	4.72274	10.4447	0.00321621	0.0362559		ENSBTAG00000014546	4.28077	-2.09064	11.8222	0.00190291	0.0231996		ENSBTAG00000010721	-2.35687	6.00503	15.5139	0.000516106	0.00560963
														ENSBTAG00000002644	2.95775	7.01501	10.4048	0.00326652	0.0365452		ENSBTAG00000002998	-2.35756	-0.734358	11.8074	0.00191344	0.023265		ENSBTAG00000014540	3.21682	0.262332	15.4648	0.00052468	0.00568326
														ENSBTAG00000013242	3.03247	6.94619	10.375	0.00330479	0.0368335		ENSBTAG00000046725	2.94133	8.15507	11.7757	0.00193623	0.0234678		ENSBTAG00000025664	-3.24375	-0.110375	15.4021	0.000535858	0.00578053
														ENSBTAG00000047374	-2.43292	-0.824631	10.3619	0.00332167	0.0368905		ENSBTAG00000022058	3.13471	1.61886	11.7755	0.00193641	0.0234678		ENSBTAG00000044132	-2.55074	3.43966	15.3863	0.000538724	0.00580276
														ENSBTAG00000017450	2.09351	4.81355	10.3572	0.00332778	0.0368905		ENSBTAG00000021887	2.21133	-1.60587	11.742	0.00195518	0.0235727		ENSBTAG00000001936	2.85371	-0.61248	15.3823	0.000539454	0.00580345
														ENSBTAG00000002922	2.07694	4.54726	10.3165	0.00338121	0.0372902		ENSBTAG00000000752	-2.23549	3.59497	11.7418	0.00196089	0.0236054		ENSBTAG00000013008	-2.66262	2.37203	15.3691	0.000541853	0.00581061
														ENSBTAG00000014082	-2.8194	0.780128	10.2695	0.00344394	0.0378216		ENSBTAG00000017273	3.02787	-0.72698	11.7041	0.00198876	0.0237597		ENSBTAG00000011733	3.92027	-0.390922	15.3668	0.000542274	0.00581061
														ENSBTAG00000011300	3.75165	-1.7649	10.4107	0.0034636	0.0378299		ENSBTAG00000027384	7.75537	-1.63589	14.7267	0.00201309	0.0239779		ENSBTAG00000016498	2.15959	2.2647	15.3584	0.000543802	0.00581061
														ENSBTAG00000025136	3.36796	2.45484	10.2385	0.00348605	0.0379648		ENSBTAG00000009768	2.14753	3.14378	11.6348	0.00204108	0.0242198		ENSBTAG00000021707	3.94829	0.620038	15.6795	0.00054436	0.00581265
														ENSBTAG00000013929	3.03227	5.87949	10.2216	0.00350922	0.038139		ENSBTAG00000000580	2.30865	-0.0314863	11.6253	0.0020483	0.0242326		ENSBTAG00000015059	5.46955	2.65073	15.3529	0.000544823	0.00581365
														ENSBTAG00000018375	3.5428	-0.425034	10.3748	0.00351134	0.038139		ENSBTAG00000047036	2.19772	-0.709251	11.6149	0.00205602	0.0242819		ENSBTAG00000046640	3.74365	-0.34883	15.3472	0.00054587	0.0058209
														ENSBTAG00000017655	2.17887	3.45297	10.2111	0.00352369	0.0381942		ENSBTAG00000010766	-2.01817	3.29274	11.6145	0.00205668	0.0242819		ENSBTAG00000045539	3.18486	-1.46825	15.3341	0.00054828	0.0058387
														ENSBTAG00000010188	3.73707	-0.233003	10.4765	0.00362215	0.039047		ENSBTAG00000007450	2.83908	4.46652	11.6107	0.00205961	0.0242819		ENSBTAG00000020489	2.64165	2.26025	15.32	0.000550901	0.00585567
														ENSBTAG00000017183	2.98332	8.31921	10.1335	0.00363291	0.0391363		ENSBTAG00000019708	-2.06981	0.223695	11.6044	0.00206442	0.0242819		ENSBTAG00000037743	3.22475	1.82247	15.3097	0.000552811	0.00586716
														ENSBTAG00000047944	-4.687	-2.39306	10.4283	0.00368757	0.0396169		ENSBTAG00000015366	2.44009	8.81657	11.5999	0.00206792	0.0242819		ENSBTAG00000009148	3.52913	0.564107	15.3054	0.000553627	0.00586793
														ENSBTAG00000016661	2.34388	2.63036	10.0778	0.00371348	0.0396802		ENSBTAG00000008013	3.1704	-0.238279	11.7809	0.00207839	0.0243363		ENSBTAG00000004428	-2.27464	7.2442	15.2971	0.000555163	0.00588026
														ENSBTAG00000047923	5.09042	-2.11669	10.2196	0.0037263	0.0397434		ENSBTAG00000024449	-3.16471	6.05499	11.5763	0.00208637	0.0243363		ENSBTAG00000038878	2.06481	0.22876	15.244	0.000565223	0.00595263
														ENSBTAG00000036363	3.66632	-1.2037	10.3979	0.00372957	0.0397434		ENSBTAG00000010384	-2.61312	3.03239	11.5734	0.00208861	0.0243367		ENSBTAG00000000960	3.20014	-0.0405244	15.24	0.000565979	0.00595263
														ENSBTAG00000034680	2.52116	-1.43374	10.0643	0.00373322	0.0397556		ENSBTAG00000019327	3.93873	3.01695	11.5653	0.00209502	0.0243652		ENSBTAG00000033441	-3.24246	4.40998	15.2142	0.000570954	0.00597411
														ENSBTAG00000046166	2.80476	0.513633	10.0343	0.00377765	0.0401744		ENSBTAG00000018369	4.04047	6.56236	11.562	0.00209759	0.0243671		ENSBTAG00000007828	3.06207	-1.65194	15.1853	0.000576141	0.00600175
														ENSBTAG00000013124	2.36867	2.21162	9.9466	0.00391099	0.0412313		ENSBTAG00000010640	-2.42386	3.07585	11.517	0.00213339	0.0246651		ENSBTAG00000026796	5.73278	-0.891246	16.3341	0.000581028	0.00602904
														ENSBTAG00000013810	2.12244	1.82449	9.89981	0.00398418	0.0417519		ENSBTAG00000037539	4.57992	1.09234	11.5157	0.00213442	0.0246651		ENSBTAG00000021009	3.49154	6.64133	15.1624	0.000581052	0.00602904
														ENSBTAG00000046333	3.11404	3.02108	9.89795	0.00398713	0.041755		ENSBTAG00000008612	3.41691	8.30757	11.5035	0.0021443	0.024756		ENSBTAG00000020227	-2.98718	2.34935	15.153	0.000582893	0.00604416
														ENSBTAG00000012285	2.70487	-0.0131011	9.85204	0.00406046	0.0423824		ENSBTAG00000004720	2.57676	5.62678	11.4924	0.00215327	0.0248051		ENSBTAG00000008329	3.75837	3.88816	15.1291	0.000587635	0.00608534
														ENSBTAG00000022019	-2.33116	-1.4483	9.81513	0.00412046	0.0428814		ENSBTAG00000034106	2.78361	-0.784128	11.4746	0.00216772	0.024917		ENSBTAG00000008676	2.52535	-0.934431	15.1192	0.000588814	0.00609318
														ENSBTAG00000016169	-2.38077	5.52957	9.81428	0.00412186	0.0428814		ENSBTAG00000014642	2.21003	2.57072	11.466	0.00217478	0.0249414		ENSBTAG00000045743	2.04897	1.76333	15.1128	0.00059091	0.00609318
														ENSBTAG00000006354	2.6154	-1.16186	9.79286	0.00415714	0.0431348		ENSBTAG00000009917	2.19533	2.09597	11.4418	0.00219473	0.0250813		ENSBTAG00000027182	2.04638	2.90287	15.1118	0.000591095	0.00609318
														ENSBTAG00000013147	-3.0255	2.12867	9.74727	0.00423331	0.0437764		ENSBTAG00000007568	3.10899	-0.238024	11.8564	0.00219761	0.0250911		ENSBTAG00000016619	-3.10938	2.63532	15.0964	0.000594197	0.00610306
														ENSBTAG00000007732	2.44319	6.24144	9.70381	0.00430735	0.0443725		ENSBTAG00000019028	2.60832	-0.846821	11.4194	0.00221333	0.0252142		ENSBTAG00000019901	-2.18869	3.93637	15.0955	0.000594373	0.00610306
														ENSBTAG00000000983	3.37831	2.06587	9.5446	0.00459085	0.0466234		ENSBTAG00000017021	-2.09675	5.01396	11.4128	0.00221889	0.0252295		ENSBTAG00000015769	4.14289	-0.763328	15.086	0.000596292	0.00611086
														ENSBTAG00000008111	-2.62308	-0.209634	9.54149	0.00459657	0.0466515		ENSBTAG00000009774	5.53911	-0.206522	12.098	0.002226	0.0252434		ENSBTAG00000010077	-2.71314	4.16211	15.086	0.000596295	0.00611086
														ENSBTAG00000007044	2.14099	-1.14709	9.5382	0.00460264	0.0466531		ENSBTAG00000009148	3.01225	0.564107	11.3857	0.00224171	0.0253248		ENSBTAG00000029931	2.6457	-0.835015	15.0799	0.000597106	0.00611133
														ENSBTAG00000047754	-5.15131	2.25582	9.4706	0.00472944	0.0474225		ENSBTAG00000011759	-2.50876	-0.595562	11.3306	0.0022889	0.0256194		ENSBTAG00000021120	3.91362	6.56314	15.082	0.000597115	0.00611133
														ENSBTAG00000029826	2.51394	3.30777	9.42834	0.00481063	0.0480348		ENSBTAG00000002880	2.6455	3.36641	11.2836	0.00233004	0.0259511		ENSBTAG00000000597	2.28489	-1.45612	15.0433	0.000602544	0.00614074
														ENSBTAG00000003510	-3.5397	-1.88604	9.42307	0.00482085	0.0480562		ENSBTAG00000021823	2.85937	4.16186	11.2677	0.0023441	0.0260566		ENSBTAG00000019984	-2.02282	5.42564	15.0444	0.000604787	0.00614601
														ENSBTAG00000020394	2.58419	-0.672173	9.41633	0.00483397	0.0481323		ENSBTAG00000002613	-2.11212	4.39308	11.2606	0.00235043	0.0261045		ENSBTAG00000044175	-2.97923	3.13987	15.0259	0.000608609	0.00617113
														ENSBTAG00000001503	2.56876	6.30043	9.41152	0.00484336	0.0481759		ENSBTAG00000046006	3.86808	-1.52739	11.2473	0.00236228	0.0261624		ENSBTAG00000047466	3.08198	0.303667	14.9774	0.000618738	0.00623558
														ENSBTAG00000019792	2.30387	1.1017	9.38675	0.004892	0.0484351		ENSBTAG00000002580	3.02925	3.50537	11.2435	0.00236572	0.0261822		ENSBTAG00000018267	3.96269	5.43047	14.9752	0.000619196	0.00623621
														ENSBTAG00000047481	-5.98719	-0.0269241	9.4975	0.0049342	0.048712		ENSBTAG00000017911	5.88282	-2.64002	11.3966	0.00239294	0.026322		ENSBTAG00000005615	2.17863	2.3839	14.9668	0.000620972	0.00624613
														ENSBTAG00000017026	-2.49652	2.79694	9.36521	0.00493475	0.048712		ENSBTAG00000012514	2.44394	7.9684	11.2112	0.00239494	0.026322		ENSBTAG00000002551	2.00945	1.42593	14.883	0.000638971	0.00637034
														ENSBTAG00000000053	2.6402	4.81055	9.36488	0.00493541	0.048712		ENSBTAG00000004508	2.01348	-0.123907	11.384	0.00240407	0.026403		ENSBTAG00000011082	3.18686	0.762357	14.8534	0.000645465	0.00641592
														ENSBTAG00000010345	3.62788	1.97693	9.33352	0.00499836	0.049162		ENSBTAG00000015341	2.4282	1.99792	11.1767	0.00242651	0.026561		ENSBTAG00000011405	-2.1784	2.9671	14.8389	0.00064866	0.00643846
														ENSBTAG00000020409	2.81251	-0.0322079	9.32985	0.00500578	0.049162		ENSBTAG00000007547	3.457	5.04941	11.1735	0.0024295	0.026561		ENSBTAG00000013921	5.29461	8.24239	14.8333	0.000649914	0.00644006
														ENSBTAG00000006805	2.06861	5.07576	9.32898	0.00500755	0.049162		ENSBTAG00000017509	2.81218	6.52222	11.0957	0.00250258	0.0270334		ENSBTAG00000003353	2.6987	2.51469	14.8327	0.000650046	0.00644006
														ENSBTAG00000014088	2.17748	0.313986	9.32338	0.00501891	0.0492283		ENSBTAG00000009396	-3.0427	2.52722	11.067	0.00253017	0.0271969		ENSBTAG00000035319	-2.70471	4.32147	14.8276	0.000651182	0.00644064
														ENSBTAG00000027058	-2.31249	-0.346327	9.31414	0.00503769	0.0493819		ENSBTAG00000006951	2.65088	3.41341	11.0638	0.00253323	0.0271969		ENSBTAG00000007450	3.26105	4.46652	14.8263	0.000651469	0.00644064
														ENSBTAG00000009190	2.97227	3.12513	9.29586	0.00507511	0.0495905		ENSBTAG00000012252	2.25719	3.15399	11.0566	0.00254023	0.027198		ENSBTAG00000015396	2.68883	6.03551	14.778	0.000662324	0.00650859
																					ENSBTAG00000021218	3.81237	10.0809	11.0242	0.00257185	0.0273478		ENSBTAG00000042482	-2.03876	1.96458	14.7687	0.000664431	0.00651712
																					ENSBTAG00000046140	2.00317	3.32429	11.023	0.00257301	0.0273478		ENSBTAG00000002998	-2.69347	-0.734358	14.749	0.000668928	0.00655309
																					ENSBTAG00000004355	-3.72633	-2.05427	11.0174	0.0025785	0.0273664		ENSBTAG00000046325	-2.30318	4.4008	14.7168	0.000676365	0.00660544
																					ENSBTAG00000009190	3.26076	3.12513	10.9655	0.00263021	0.0276918		ENSBTAG00000014884	2.07971	6.03486	14.7039	0.000679359	0.00660813
																					ENSBTAG00000014315	2.32062	-1.71454	10.9464	0.00264277	0.0277792		ENSBTAG00000011300	4.36167	-1.7649	15.0023	0.000679643	0.00660813
																					ENSBTAG00000024492	3.51315	-1.51932	11.1233	0.00264802	0.0277792		ENSBTAG00000012992	2.83904	2.01639	14.6758	0.000685927	0.00662833
																					ENSBTAG00000002699	2.5107	0.94559	10.9089	0.00268796	0.0279326		ENSBTAG00000013100	-3.05165	4.98018	14.6619	0.000689224	0.00663912
																					ENSBTAG00000004224	2.41558	-0.989098	10.8709	0.00272741	0.0281886		ENSBTAG00000032372	-2.36124	3.7262	14.6555	0.000690744	0.00664257
																					ENSBTAG00000004951	2.02204	-0.883123	10.8388	0.00275721	0.0283665		ENSBTAG00000005010	-2.3975	2.89162	14.6404	0.000694327	0.00665727
																					ENSBTAG00000030523	2.54986	-1.59862	10.8202	0.00277918	0.0284812		ENSBTAG00000016026	-2.20671	5.12704	14.6312	0.000696525	0.00666628
																					ENSBTAG00000017863	3.42336	-0.23539	10.8144	0.00278736	0.0285095		ENSBTAG00000030444	5.00836	-1.59172	14.9281	0.000696534	0.00666628
																					ENSBTAG00000021193	-2.41433	3.12664	10.8114	0.00279051	0.0285232		ENSBTAG00000013219	2.02114	0.174947	14.6002	0.000703511	0.00669749
																					ENSBTAG00000005714	2.04995	11.1095	10.7839	0.00282023	0.0286968		ENSBTAG00000007732	3.07258	6.24144	14.6018	0.000703614	0.00669749
																					ENSBTAG00000038277	-3.37345	-0.0811917	10.7236	0.0028866	0.0291095		ENSBTAG00000000440	2.52728	6.37123	14.5966	0.000704867	0.00670537
																					ENSBTAG00000042882	2.63453	-1.60812	10.7121	0.00289731	0.0291616		ENSBTAG00000020661	3.39968	4.08402	14.5909	0.000706245	0.00671443
																					ENSBTAG00000031135	4.01889	1.10803	10.858	0.00292414	0.0293567		ENSBTAG00000033076	2.65879	4.06679	14.5363	0.000719661	0.00681969
																					ENSBTAG00000029826	2.68848	3.30777	10.6509	0.00296882	0.0296357		ENSBTAG00000017446	-3.35725	4.01994	14.5242	0.000722663	0.00683757
																					ENSBTAG00000013802	2.93315	1.94273	10.639	0.00298248	0.0296782		ENSBTAG00000007103	3.83979	-1.37777	14.5107	0.000726025	0.00685356
																					ENSBTAG00000021916	3.00521	7.23367	10.625	0.00299873	0.0297773		ENSBTAG00000014615	2.44723	3.8209	14.5095	0.000726327	0.00685356
																					ENSBTAG00000004337	-2.37363	-0.169912	10.5656	0.00306856	0.0302234		ENSBTAG00000048173	2.83317	1.04312	14.5072	0.000726911	0.00685356
																					ENSBTAG00000001417	6.98563	-1.70389	10.6972	0.00310679	0.0305247		ENSBTAG00000011124	-2.73908	-1.66871	14.497	0.00072765	0.00685356
																					ENSBTAG00000009520	-4.7116	-2.12118	10.6866	0.00311671	0.0305705		ENSBTAG00000004085	-2.53474	4.11627	14.4594	0.000738994	0.00690925
																					ENSBTAG00000013662	2.11891	6.79284	10.5008	0.00314679	0.0307128		ENSBTAG00000020000	3.73529	3.16546	14.4421	0.00074344	0.00692784
																					ENSBTAG00000009218	-2.33531	7.19321	10.4899	0.00316013	0.0308231		ENSBTAG00000002845	2.59177	-0.818207	14.4366	0.000744328	0.00692784
																					ENSBTAG00000017069	2.61748	2.97436	10.4681	0.00318701	0.0309904		ENSBTAG00000006789	2.98252	3.20544	14.384	0.000758531	0.00702687
																					ENSBTAG00000006520	3.14006	-0.678824	10.4348	0.00322865	0.0312094		ENSBTAG00000005607	-2.64027	3.81029	14.3833	0.000758702	0.00702687
																					ENSBTAG00000045539	2.6576	-1.46825	10.4208	0.00324626	0.0313348		ENSBTAG00000002882	-2.50347	6.18194	14.3351	0.000771473	0.00711333
																					ENSBTAG00000009260	2.1124	3.86572	10.3845	0.00329256	0.0315722		ENSBTAG00000000703	3.84274	0.730836	14.3146	0.000776973	0.00714996
																					ENSBTAG00000005776	2.42852	-0.384851	10.3799	0.00329851	0.0316072		ENSBTAG00000040244	-3.3603	-1.74298	14.2976	0.000780599	0.00717079
																					ENSBTAG00000002349	-2.58736	-1.65946	10.3697	0.00330695	0.0316689		ENSBTAG00000039967	-3.77104	-1.39824	14.2875	0.000784309	0.00719929
																					ENSBTAG00000039524	3.83014	-0.247953	10.3716	0.00330918	0.031671		ENSBTAG00000009387	4.05715	8.23421	14.2617	0.000791368	0.00723474
																					ENSBTAG00000013319	2.83988	-1.79098	10.3565	0.00332733	0.0317677		ENSBTAG00000039462	-3.2129	4.81919	14.2605	0.000791686	0.00723474
																					ENSBTAG00000019354	-2.16015	-0.200199	10.3355	0.00335622	0.0318955		ENSBTAG00000011390	3.65833	6.49934	14.2551	0.000793177	0.00724416
																					ENSBTAG00000045757	3.35734	8.18483	10.3308	0.00336232	0.0319278		ENSBTAG00000016398	-2.07004	1.58522	14.2288	0.000800464	0.00729384
																					ENSBTAG00000022564	4.21978	-1.34988	10.3217	0.00337432	0.0319841		ENSBTAG00000026350	2.04113	0.702841	14.2217	0.000802454	0.00730775
																					ENSBTAG00000007440	2.38835	-1.55025	10.291	0.00341271	0.0321933		ENSBTAG00000016063	-2.95024	0.126995	14.2012	0.000808174	0.00734712
																					ENSBTAG00000014088	2.29287	0.313986	10.2712	0.00344166	0.0323459		ENSBTAG00000005102	2.28899	4.11053	14.1646	0.000818551	0.00738426
																					ENSBTAG00000009752	2.72072	1.66416	10.2377	0.0034872	0.0325651		ENSBTAG00000047284	4.54232	-2.10266	14.1319	0.000827924	0.00744626
																					ENSBTAG00000044175	-2.38345	3.13987	10.2327	0.00349405	0.0326098		ENSBTAG00000046046	8.38027	0.767672	15.1588	0.000828536	0.00744626
																					ENSBTAG00000007705	2.22795	6.35254	10.2147	0.00351876	0.0327541		ENSBTAG00000046166	3.35825	0.513633	14.1243	0.000830126	0.00744626
																					ENSBTAG00000005048	5.12387	0.421585	10.5454	0.0035309	0.0327985		ENSBTAG00000047648	2.11811	0.74539	14.1217	0.000830875	0.00744626
																					ENSBTAG00000010444	2.72043	6.02717	10.2036	0.00353414	0.0328093		ENSBTAG00000019028	2.885	-0.846821	14.0532	0.000850968	0.00756603
																					ENSBTAG00000048122	2.423	-1.69643	10.1528	0.00360389	0.0332355		ENSBTAG00000034106	3.07118	-0.784128	14.0499	0.000851954	0.00756643
																					ENSBTAG00000002922	2.06046	4.54726	10.1528	0.00360533	0.0332355		ENSBTAG00000009260	2.48625	3.86572	14.0443	0.000853608	0.0075736
																					ENSBTAG00000023023	4.51481	0.695612	10.1353	0.0036303	0.0333878		ENSBTAG00000009383	-2.8879	5.04017	14.0338	0.000856765	0.00758355
																					ENSBTAG00000005782	2.64205	-1.79144	10.1288	0.00363776	0.033398		ENSBTAG00000001235	2.68934	-1.31995	14.0149	0.000862434	0.00762945
																					ENSBTAG00000004351	-3.4198	-1.08947	10.1232	0.00364764	0.033454		ENSBTAG00000012463	2.64001	4.56755	14.002	0.000866345	0.00765092
																					ENSBTAG00000009433	2.43004	-1.49501	10.1078	0.00366981	0.0335823		ENSBTAG00000007275	3.95221	-1.15387	13.9878	0.000870646	0.00767209
																					ENSBTAG00000020755	-8.33447	-0.995741	10.4374	0.00367513	0.0336007		ENSBTAG00000014788	2.07963	7.01664	13.9795	0.000873171	0.00768137
																					ENSBTAG00000000698	2.08744	5.90931	10.0943	0.0036894	0.0336567		ENSBTAG00000046696	-3.49871	0.379568	13.9466	0.000883288	0.00773588
																					ENSBTAG00000006835	2.04848	4.29712	10.0889	0.00369725	0.0337088		ENSBTAG00000009917	2.43903	2.09597	13.943	0.000884399	0.00774131
																					ENSBTAG00000004206	3.35776	3.04994	10.0752	0.00371719	0.0338431		ENSBTAG00000005456	-3.00129	3.95957	13.9257	0.000889776	0.00777784
																					ENSBTAG00000040323	3.48924	1.37926	10.0698	0.00372514	0.0338848		ENSBTAG00000016396	2.10876	0.263991	13.9118	0.000894128	0.00779259
																					ENSBTAG00000018703	4.41563	-0.836361	10.6095	0.00374131	0.0339732		ENSBTAG00000045010	2.46709	0.867619	13.8968	0.000898866	0.00782023
																					ENSBTAG00000014199	-2.63284	-1.41321	10.0414	0.00376717	0.0340708		ENSBTAG00000012074	-2.41956	1.42749	13.8834	0.000903075	0.0078425
																					ENSBTAG00000017866	2.87067	2.77318	10.0121	0.00381097	0.0343684		ENSBTAG00000001492	4.19792	-2.20029	13.8824	0.000903413	0.0078425
																					ENSBTAG00000012463	2.20107	4.56755	9.99998	0.00382927	0.0344547		ENSBTAG00000002947	4.40449	-2.23146	14.4644	0.000907443	0.00787315
																					ENSBTAG00000025664	-2.45265	-0.110375	9.95786	0.0038936	0.0347275		ENSBTAG00000017450	2.45068	4.81355	13.8601	0.000910497	0.00788605
																					ENSBTAG00000007193	2.48086	-0.802567	10.0946	0.00390989	0.0347275		ENSBTAG00000012252	2.5499	3.15399	13.8512	0.000913369	0.00789791
																					ENSBTAG00000015441	-2.89028	6.41222	9.91963	0.00395299	0.0349392		ENSBTAG00000010458	4.43333	-1.97504	13.8451	0.000915301	0.00789791
																					ENSBTAG00000001187	-2.07616	-1.93108	9.91302	0.00395452	0.0349392		ENSBTAG00000021582	-2.01582	5.70787	13.8426	0.000916114	0.00790061
																					ENSBTAG00000007275	3.32701	-1.15387	9.90242	0.00398006	0.0350325		ENSBTAG00000008004	3.61728	-1.24155	13.8373	0.000917832	0.00790266
																					ENSBTAG00000008493	4.77401	0.0813227	9.88675	0.00400488	0.0352117		ENSBTAG00000017722	3.1111	-0.771959	13.8241	0.000922105	0.00792664
																					ENSBTAG00000011803	3.53729	11.7072	9.87832	0.0040183	0.0352303		ENSBTAG00000021823	3.20787	4.16186	13.8224	0.000922648	0.00792664
																					ENSBTAG00000006466	3.61962	-1.59047	9.87801	0.0040188	0.0352303		ENSBTAG00000046988	4.21051	-1.96298	14.0657	0.000930375	0.00795836
																					ENSBTAG00000006789	2.42343	3.20544	9.87521	0.00402326	0.0352303		ENSBTAG00000021000	2.68811	4.32915	13.7962	0.000931197	0.00796108
																					ENSBTAG00000013488	3.32311	-1.98628	9.87422	0.00402485	0.0352303		ENSBTAG00000005129	-2.97309	4.05939	13.7658	0.000941187	0.00800745
																					ENSBTAG00000026236	2.95021	0.662309	9.85515	0.00405543	0.0353862		ENSBTAG00000009637	2.07308	5.63715	13.746	0.000947797	0.00805499
																					ENSBTAG00000043548	2.37904	1.28881	9.85251	0.00405969	0.0353862		ENSBTAG00000010640	-2.68059	3.07585	13.7352	0.000951406	0.00808101
																					ENSBTAG00000014920	2.37882	-1.37752	9.84046	0.00407504	0.0353862		ENSBTAG00000021251	2.77588	-1.63838	13.9805	0.000955123	0.00809546
																					ENSBTAG00000005759	5.09513	-1.04032	10.1551	0.0040837	0.035431		ENSBTAG00000046447	2.85831	-1.87303	13.7038	0.000960405	0.00811843
																					ENSBTAG00000031768	2.07697	-1.15586	9.82932	0.00408825	0.0354509		ENSBTAG00000037650	3.09572	-1.63008	13.968	0.000961836	0.00812618
																					ENSBTAG00000019636	4.2735	4.26294	9.8251	0.00410416	0.0355084		ENSBTAG00000006419	4.27612	5.67557	13.6848	0.000968467	0.008156
																					ENSBTAG00000011672	2.83372	-0.689657	9.81692	0.00411752	0.035541		ENSBTAG00000017863	3.88594	-0.23539	13.6797	0.000970199	0.00816623
																					ENSBTAG00000017466	-3.18181	-0.273661	9.7894	0.00416287	0.0357639		ENSBTAG00000031768	2.40652	-1.15586	13.6614	0.000973032	0.00818064
																					ENSBTAG00000015419	2.30525	-1.41958	9.77968	0.00417492	0.035848		ENSBTAG00000020548	-2.2051	0.437863	13.6502	0.000980357	0.00819925
																					ENSBTAG00000010829	2.5349	0.132508	9.77258	0.00419084	0.035908		ENSBTAG00000005895	-3.21051	1.51217	13.6405	0.000983716	0.00821569
																					ENSBTAG00000014345	4.62669	1.89112	9.77247	0.00419101	0.035908		ENSBTAG00000006551	-3.17077	3.8634	13.6401	0.000983884	0.00821569
																					ENSBTAG00000038275	-2.67656	0.58356	9.75613	0.0042184	0.0360839		ENSBTAG00000004720	2.83358	5.62678	13.63	0.000987393	0.00823193
																					ENSBTAG00000046640	2.99225	-0.34883	9.75084	0.0042273	0.0361209		ENSBTAG00000017512	2.30818	1.52209	13.6051	0.000996124	0.00828222
																					ENSBTAG00000001503	2.61889	6.30043	9.74284	0.00424079	0.036197		ENSBTAG00000017366	3.28367	-1.18842	13.6038	0.000996574	0.00828222
																					ENSBTAG00000014011	2.12061	1.41161	9.71739	0.00428407	0.0364285		ENSBTAG00000018643	-2.29535	5.32168	13.5998	0.000997971	0.0082829
																					ENSBTAG00000039995	2.87572	6.42092	9.7009	0.00431237	0.0366099		ENSBTAG00000033481	-6.24063	-2.20489	14.1712	0.000998756	0.0082829
																					ENSBTAG00000018843	3.79956	2.31851	9.83053	0.00433105	0.0366698		ENSBTAG00000000328	6.46719	-2.12018	13.8495	0.00100154	0.00830162
																					ENSBTAG00000012088	2.16986	7.24712	9.64848	0.00440366	0.0370636		ENSBTAG00000039524	4.39818	-0.247953	13.5837	0.00100371	0.00831085
																					ENSBTAG00000021434	-3.96715	-0.953156	9.95072	0.00441053	0.0370636		ENSBTAG00000013319	3.19283	-1.79098	13.5793	0.00100462	0.00831173
																					ENSBTAG00000047174	2.68954	7.07967	9.63727	0.00442345	0.0370743		ENSBTAG00000011780	3.68869	-0.710499	13.5804	0.00100486	0.00831173
																					ENSBTAG00000046447	2.43914	-1.87303	9.61925	0.00445108	0.0372465		ENSBTAG00000027051	3.11629	-1.2693	13.5659	0.00101005	0.00833276
																					ENSBTAG00000009137	3.6402	-1.49457	9.75642	0.00445795	0.0372842		ENSBTAG00000035013	-3.02561	1.91831	13.5499	0.00101578	0.00837023
																					ENSBTAG00000012992	2.25862	2.01639	9.60791	0.00447575	0.0373539		ENSBTAG00000002880	2.92476	3.36641	13.5488	0.00101618	0.00837023
																					ENSBTAG00000015926	2.3577	6.33474	9.56586	0.00455183	0.0376504		ENSBTAG00000010829	2.99863	0.132508	13.5463	0.00101706	0.00837314
																					ENSBTAG00000037399	2.08669	4.74625	9.5596	0.00456328	0.0376787		ENSBTAG00000019591	2.31986	0.128549	13.5164	0.00102791	0.00844755
																					ENSBTAG00000047009	-3.19837	-1.46722	9.55575	0.00457033	0.0377046		ENSBTAG00000031020	5.31952	-2.35962	14.4637	0.00102824	0.00844755
																					ENSBTAG00000017366	2.77356	-1.18842	9.54687	0.00458665	0.0377997		ENSBTAG00000016726	-2.87626	3.79447	13.5028	0.00103289	0.00848002
																					ENSBTAG00000007773	4.15741	3.21177	9.52094	0.00463466	0.0380761		ENSBTAG00000012150	5.39506	-2.26412	14.0409	0.00104251	0.00852924
																					ENSBTAG00000021000	2.19251	4.32915	9.46601	0.0047382	0.0384956		ENSBTAG00000001341	-2.16752	3.09172	13.4603	0.00104856	0.0085558
																					ENSBTAG00000047379	2.92418	4.7538	9.36339	0.00493836	0.039509		ENSBTAG00000040042	2.48931	0.653329	13.4602	0.00104863	0.0085558
																					ENSBTAG00000000575	-2.0568	10.5925	9.32648	0.00501261	0.0398534		ENSBTAG00000031891	2.85845	-0.502261	13.4591	0.00104901	0.0085558
																					ENSBTAG00000023144	2.20457	-1.20458	9.31194	0.00504219	0.040001		ENSBTAG00000008096	-4.20285	-1.34445	13.4439	0.00105471	0.00857288
																					ENSBTAG00000006354	2.56115	-1.16186	9.30061	0.00506536	0.040058		ENSBTAG00000005938	4.36793	-1.54697	13.4403	0.00105605	0.00857337
																					ENSBTAG00000007772	-2.87406	-0.738528	9.29716	0.00507244	0.0400626		ENSBTAG00000002030	3.57351	-1.61805	13.6906	0.00105759	0.00857704
																					ENSBTAG00000014969	2.36087	-0.53481	9.28515	0.00509717	0.0401764		ENSBTAG00000020649	2.92128	0.313996	13.4287	0.00106042	0.00858676
																					ENSBTAG00000005234	2.00329	1.73737	9.27045	0.00512763	0.0403411		ENSBTAG00000019244	2.397	1.28384	13.4199	0.00106375	0.0086049
																					ENSBTAG00000021325	2.70113	-0.743266	9.26697	0.00513485	0.0403458		ENSBTAG00000014619	2.04701	3.36392	13.3857	0.00107677	0.00868121
																					ENSBTAG00000021924	2.88386	-1.18872	9.25666	0.00515636	0.0403859		ENSBTAG00000044225	3.89276	-2.12365	14.2813	0.00108905	0.00873789
																					ENSBTAG00000021681	-2.76396	2.59815	9.25371	0.00516254	0.0404047		ENSBTAG00000006619	3.26647	-1.89733	13.3126	0.00110516	0.00882129
																					ENSBTAG00000009230	2.46153	4.46374	9.22981	0.00521284	0.0406468		ENSBTAG00000018369	4.40731	6.56236	13.3087	0.00110671	0.00882129
																					ENSBTAG00000020954	2.35237	0.511501	9.22511	0.0052228	0.0407043		ENSBTAG00000016613	3.72882	-2.05997	13.8551	0.00110859	0.00882481
																					ENSBTAG00000006419	3.38035	5.67557	9.22353	0.00522615	0.0407103		ENSBTAG00000015067	4.28344	-1.27192	13.5302	0.00111766	0.00887303
																					ENSBTAG00000023177	3.08612	2.61781	9.19046	0.00529681	0.0410783		ENSBTAG00000004951	2.22755	-0.883123	13.2756	0.0011177	0.00887303
																					ENSBTAG00000047944	-4.53286	-2.39306	9.45686	0.00532528	0.0412788		ENSBTAG00000021325	3.22856	-0.743266	13.2591	0.00112649	0.00890921
																					ENSBTAG00000021531	2.32031	-1.64942	9.11949	0.00545157	0.041908		ENSBTAG00000047347	-2.5584	2.7753	13.2584	0.00112678	0.00890921
																					ENSBTAG00000006037	2.66375	3.95783	9.11411	0.00546399	0.0419172		ENSBTAG00000008216	-3.24479	7.04048	13.2441	0.00113252	0.00893231
																					ENSBTAG00000001920	-2.52891	2.83423	9.11318	0.00546608	0.0419172		ENSBTAG00000004877	-2.31671	1.37989	13.2254	0.00114014	0.00896994
																					ENSBTAG00000020837	-2.05697	0.25413	9.10108	0.00549309	0.0420426		ENSBTAG00000042250	-2.99389	-1.30392	13.2142	0.00114472	0.00898888
																					ENSBTAG00000023784	2.24785	2.15269	9.07146	0.00555986	0.0422464		ENSBTAG00000026236	3.46023	0.662309	13.2139	0.00114483	0.00898888
																					ENSBTAG00000020263	-2.75468	-1.03806	9.0408	0.00562992	0.0426965		ENSBTAG00000004840	3.72376	8.83059	13.1665	0.00116444	0.00911113
																					ENSBTAG00000010048	-2.19142	2.18382	9.0057	0.00571131	0.043086		ENSBTAG00000003314	-2.18163	4.36077	13.1622	0.00116622	0.00911423
																					ENSBTAG00000010948	2.28687	2.86096	8.99695	0.00573177	0.0431784		ENSBTAG00000012514	2.6682	7.9684	13.1296	0.00117992	0.00918219
																					ENSBTAG00000009064	2.22918	-0.836768	8.99545	0.0057353	0.0431785		ENSBTAG00000001197	3.7767	-1.62923	13.3677	0.00118232	0.00918319
																					ENSBTAG00000021842	3.54246	-1.87006	9.09024	0.0057996	0.043388		ENSBTAG00000047468	3.03242	-0.648632	13.1209	0.00118361	0.00918825
																					ENSBTAG00000006273	-2.19512	-0.316452	8.95554	0.00582981	0.0435223		ENSBTAG00000017026	-3.08112	2.79694	13.1169	0.00118531	0.00919245
																					ENSBTAG00000011124	-2.02011	-1.66871	8.94382	0.00585059	0.0435943		ENSBTAG00000021328	5.52182	-2.13571	13.6473	0.00118794	0.00920542
																					ENSBTAG00000005299	2.6921	2.68993	8.9335	0.00588275	0.0437127		ENSBTAG00000000698	2.40514	5.90931	13.1102	0.00118815	0.00920542
																					ENSBTAG00000021484	-2.02435	0.815477	8.93109	0.00588855	0.0437127		ENSBTAG00000003290	2.5796	-0.684824	13.0384	0.00121919	0.00936772
																					ENSBTAG00000004022	2.48176	-1.39156	8.90742	0.00594604	0.0439534		ENSBTAG00000036363	4.16754	-1.2037	13.5646	0.00122121	0.00937413
																					ENSBTAG00000043991	2.15712	-0.00697888	8.90447	0.00595324	0.0439654		ENSBTAG00000038974	-2.16952	-0.640585	13.0187	0.00122668	0.0093988
																					ENSBTAG00000001078	2.06426	7.48414	8.89626	0.00597335	0.0440727		ENSBTAG00000010989	2.2365	4.72404	13.0108	0.00123135	0.00941075
																					ENSBTAG00000047538	2.72065	0.287483	8.8884	0.00599267	0.0441505		ENSBTAG00000004388	4.25982	-0.0510652	13.0018	0.00123537	0.00942776
																					ENSBTAG00000011766	3.42358	2.86894	8.87945	0.00601475	0.0442127		ENSBTAG00000021484	-2.51318	0.815477	12.9901	0.00124056	0.00945265
																					ENSBTAG00000004582	2.09179	-1.08614	8.87679	0.00602132	0.0442405		ENSBTAG00000006466	4.11666	-1.59047	12.959	0.00125456	0.00952356
																					ENSBTAG00000000456	3.07873	-1.52344	8.86042	0.00606198	0.0443739		ENSBTAG00000046396	-3.11769	1.26571	12.9495	0.00125884	0.00952541
																					ENSBTAG00000030333	2.1755	5.41332	8.83099	0.00613582	0.0446453		ENSBTAG00000004221	-4.11562	5.48732	12.9297	0.00126785	0.00957379
																					ENSBTAG00000033076	2.03023	4.06679	8.80715	0.00619638	0.0448425		ENSBTAG00000006354	2.98728	-1.16186	12.9278	0.00126873	0.00957584
																					ENSBTAG00000046046	6.58575	0.767672	9.16163	0.00637946	0.0458473		ENSBTAG00000014315	2.4963	-1.71454	12.8931	0.00128054	0.00964655
																					ENSBTAG00000012638	5.07138	0.120124	8.88056	0.00666544	0.0472994		ENSBTAG00000034366	3.20283	-0.818208	12.8368	0.00131113	0.00976204
																					ENSBTAG00000011082	2.39725	0.762357	8.62692	0.00667569	0.0473222		ENSBTAG00000047957	2.78002	6.43191	12.8353	0.00131185	0.00976204
																					ENSBTAG00000011207	-2.69844	4.42283	8.60122	0.00674724	0.047623		ENSBTAG00000010741	2.43565	9.422	12.8227	0.00131785	0.00978353
																					ENSBTAG00000031573	2.42074	3.63192	8.54563	0.00690493	0.0482801		ENSBTAG00000013147	-3.66185	2.12867	12.8207	0.00131877	0.00978508
																					ENSBTAG00000021707	2.88036	0.620038	8.64976	0.00692643	0.0483761		ENSBTAG00000019741	4.14489	-2.3303	13.0299	0.00133015	0.00984172
																					ENSBTAG00000011784	2.10886	0.562547	8.49924	0.0070396	0.0488347		ENSBTAG00000007193	2.81248	-0.802567	13.0135	0.0013378	0.00988199
																					ENSBTAG00000019107	2.43068	2.98908	8.46552	0.00713926	0.0493525		ENSBTAG00000002340	2.89064	-1.22431	12.7805	0.0013381	0.00988199
																					ENSBTAG00000030444	4.00129	-1.59172	8.55909	0.00718692	0.0496063		ENSBTAG00000002497	3.74764	-1.53798	12.7711	0.00134268	0.00990655
																					ENSBTAG00000011779	2.73758	-1.23169	8.4484	0.00719048	0.0496063		ENSBTAG00000010109	-2.75534	4.04655	12.7503	0.00135285	0.00995047
																					ENSBTAG00000011558	3.13325	-1.98716	8.54362	0.00723242	0.0498002		ENSBTAG00000007241	-3.2549	1.98386	12.7412	0.00135729	0.00995987
																					ENSBTAG00000019378	4.07046	1.79969	8.4328	0.00723748	0.0498133		ENSBTAG00000005745	3.7966	-2.12124	12.7409	0.00135748	0.00995987
																												ENSBTAG00000017069	2.9117	2.97436	12.7371	0.00135933	0.00996827
																												ENSBTAG00000015926	2.76266	6.33474	12.7347	0.00136052	0.00996827
																												ENSBTAG00000011659	2.62215	2.57591	12.7334	0.00136115	0.00996827
																												ENSBTAG00000021480	2.32813	1.05418	12.6905	0.0013825	0.0100732
																												ENSBTAG00000047238	3.51722	-0.897455	12.6815	0.00138706	0.0100878
																												ENSBTAG00000045862	3.71127	-1.97302	12.6572	0.00139933	0.0101536
																												ENSBTAG00000029826	2.95191	3.30777	12.6127	0.00142219	0.0102676
																												ENSBTAG00000009219	3.15048	-1.47041	12.5956	0.00143107	0.0103129
																												ENSBTAG00000037885	4.87555	-2.40584	13.4047	0.00144216	0.0103714
																												ENSBTAG00000021059	3.66038	-2.22285	12.7857	0.00144944	0.0104072
																												ENSBTAG00000008493	5.40656	0.0813227	12.5413	0.00145968	0.0104584
																												ENSBTAG00000021916	3.30491	7.23367	12.5266	0.00146751	0.0105035
																												ENSBTAG00000010345	4.27353	1.97693	12.5209	0.00147059	0.0105113
																												ENSBTAG00000016206	2.09213	2.84587	12.5049	0.0014792	0.0105441
																												ENSBTAG00000018432	3.52463	-0.255221	12.5031	0.00148017	0.0105463
																												ENSBTAG00000021874	-2.0489	2.95714	12.4983	0.00148279	0.0105564
																												ENSBTAG00000008180	-2.60891	4.25973	12.497	0.00148349	0.0105564
																												ENSBTAG00000007554	3.00133	3.87641	12.4787	0.00149343	0.0105977
																												ENSBTAG00000014435	-2.39101	3.93879	12.4775	0.0014941	0.0105977
																												ENSBTAG00000046408	2.11738	-0.285727	12.4737	0.00149618	0.0106077
																												ENSBTAG00000008331	-2.20706	1.61011	12.4715	0.00149737	0.0106114
																												ENSBTAG00000007773	4.90525	3.21177	12.4702	0.00149804	0.0106114
																												ENSBTAG00000021139	-4.32496	-1.18169	12.4528	0.00150766	0.0106651
																												ENSBTAG00000004034	2.29733	3.83546	12.4504	0.00150897	0.0106675
																												ENSBTAG00000046282	2.5159	2.28283	12.4488	0.00150983	0.0106675
																												ENSBTAG00000040193	3.01578	1.66662	12.4485	0.00151003	0.0106675
																												ENSBTAG00000046662	2.07922	-0.667378	12.3771	0.00154897	0.0108823
																												ENSBTAG00000017509	2.99187	6.52222	12.3782	0.00154939	0.0108823
																												ENSBTAG00000006591	-2.56937	3.7912	12.3711	0.00155343	0.0108964
																												ENSBTAG00000047036	2.26556	-0.709251	12.3603	0.00155929	0.0109225
																												ENSBTAG00000001503	2.99393	6.30043	12.3592	0.00156023	0.0109225
																												ENSBTAG00000009774	5.77092	-0.206522	13.16	0.00156203	0.0109225
																												ENSBTAG00000006567	3.19567	-2.21208	13.1434	0.00157055	0.0109626
																												ENSBTAG00000042293	-2.36089	-1.21882	12.2637	0.0016143	0.0111888
																												ENSBTAG00000002224	-2.40088	5.60656	12.2521	0.00162282	0.0112281
																												ENSBTAG00000046332	2.66923	11.1183	12.2199	0.00164219	0.0113318
																												ENSBTAG00000009533	2.42211	0.993454	12.2099	0.00164823	0.0113641
																												ENSBTAG00000045728	2.49275	7.42122	12.1865	0.00166252	0.0114313
																												ENSBTAG00000007888	2.01121	1.39494	12.1823	0.00166507	0.0114402
																												ENSBTAG00000015094	2.80556	2.0489	12.1622	0.00167749	0.0114862
																												ENSBTAG00000019378	5.04816	1.79969	12.1469	0.00168702	0.0115407
																												ENSBTAG00000000598	2.09215	8.313	12.1353	0.00169424	0.0115774
																												ENSBTAG00000009277	-2.64447	3.31345	12.128	0.00169883	0.011594
																												ENSBTAG00000009768	2.1911	3.14378	12.0837	0.00172683	0.0117065
																												ENSBTAG00000006552	2.69242	-1.91634	12.2701	0.00174037	0.011758
																												ENSBTAG00000027384	7.8779	-1.63589	15.3084	0.00174475	0.0117724
																												ENSBTAG00000011207	-3.28946	4.42283	12.0262	0.00176402	0.011877
																												ENSBTAG00000019060	4.49776	1.52158	12.0057	0.00177744	0.0119419
																												ENSBTAG00000002117	-2.07047	2.59855	11.9773	0.00179625	0.0120273
																												ENSBTAG00000010645	4.49956	-2.49324	13.0846	0.00181527	0.0121136
																												ENSBTAG00000018165	2.07782	0.398047	11.9262	0.00183069	0.0121817
																												ENSBTAG00000005048	5.55782	0.421585	12.3565	0.00184408	0.0122231
																												ENSBTAG00000048022	2.26772	-0.616931	11.9031	0.00184648	0.0122295
																												ENSBTAG00000004796	-5.80618	-1.9007	12.3393	0.00185518	0.0122588
																												ENSBTAG00000004272	-2.03533	3.32018	11.8657	0.00187235	0.0123534
																												ENSBTAG00000009035	-2.73197	4.16656	11.8405	0.00188998	0.0124216
																												ENSBTAG00000020537	2.50016	-1.40558	11.837	0.0018925	0.0124292
																												ENSBTAG00000000987	2.58565	5.70876	11.8153	0.00190786	0.0125041
																												ENSBTAG00000002580	3.11375	3.50537	11.8047	0.00191537	0.012521
																												ENSBTAG00000046601	-2.8901	2.12609	11.8044	0.00191559	0.012521
																												ENSBTAG00000031888	-6.04401	-1.61794	12.196	0.00195025	0.0126558
																												ENSBTAG00000047400	-2.17589	0.111545	11.6879	0.00200081	0.0128872
																												ENSBTAG00000008897	3.72614	-2.22505	11.6841	0.00200371	0.0128899
																												ENSBTAG00000010423	2.11407	1.81866	11.6757	0.00200998	0.0129054
																												ENSBTAG00000009190	3.37888	3.12513	11.6731	0.00201198	0.012913
																												ENSBTAG00000012931	2.41363	1.41631	11.6351	0.00204084	0.0130372
																												ENSBTAG00000010444	2.92766	6.02717	11.6262	0.00204767	0.0130729
																												ENSBTAG00000030845	3.86779	-0.544442	11.6189	0.00205322	0.0130978
																												ENSBTAG00000007698	-2.0194	2.7539	11.6048	0.00206414	0.0131409
																												ENSBTAG00000040065	-2.42177	2.8145	11.5988	0.00206883	0.0131654
																												ENSBTAG00000046725	2.91138	8.15507	11.5662	0.0020943	0.0132846
																												ENSBTAG00000046140	2.05412	3.32429	11.5597	0.00209938	0.0133062
																												ENSBTAG00000024492	3.58363	-1.51932	11.7344	0.00211392	0.0133662
																												ENSBTAG00000019107	2.87915	2.98908	11.5285	0.00212416	0.0134041
																												ENSBTAG00000008612	3.41985	8.30757	11.5203	0.00213072	0.0134347
																												ENSBTAG00000009618	-2.84554	3.01237	11.5147	0.00213522	0.0134523
																												ENSBTAG00000013155	-2.18047	-1.15468	11.503	0.0021387	0.0134688
																												ENSBTAG00000036400	3.25112	-0.69933	11.6841	0.0021531	0.0135326
																												ENSBTAG00000006446	2.50366	-1.61252	11.4424	0.00219286	0.0137202
																												ENSBTAG00000004767	3.51432	-2.05011	11.8608	0.00219425	0.0137202
																												ENSBTAG00000046006	3.88924	-1.52739	11.4077	0.0022231	0.0138566
																												ENSBTAG00000001608	2.93687	-1.72222	11.3872	0.00224039	0.0139424
																												ENSBTAG00000034901	2.36846	-1.44541	11.3735	0.00224999	0.0139691
																												ENSBTAG00000009658	2.27836	-1.87797	11.3687	0.00225335	0.0139749
																												ENSBTAG00000025767	3.35004	-1.90104	11.3662	0.00225828	0.013993
																												ENSBTAG00000023023	4.8157	0.695612	11.3432	0.00227801	0.0140931
																												ENSBTAG00000003329	-2.37503	5.25743	11.3359	0.00228431	0.0141155
																												ENSBTAG00000021162	-2.06502	6.79847	11.306	0.00231033	0.0142476
																												ENSBTAG00000045767	2.02491	-0.61782	11.2837	0.00232858	0.014305
																												ENSBTAG00000038277	-3.46158	-0.0811917	11.2758	0.00233691	0.0143395
																												ENSBTAG00000001619	2.05598	4.14565	11.2608	0.00235021	0.0143987
																												ENSBTAG00000005877	2.10425	-0.53041	11.2553	0.00235514	0.0144152
																												ENSBTAG00000018843	4.14226	2.31851	11.4373	0.00235729	0.0144152
																												ENSBTAG00000039935	2.26085	-0.0256301	11.2332	0.00237496	0.0145053
																												ENSBTAG00000003369	2.70138	1.90296	11.2085	0.00239737	0.0146026
																												ENSBTAG00000011713	2.17059	-1.04089	11.1701	0.00243207	0.0147662
																												ENSBTAG00000001139	2.09268	3.47775	11.1669	0.00243563	0.0147662
																												ENSBTAG00000046279	2.17417	-1.62414	11.1502	0.00244464	0.0147934
																												ENSBTAG00000007568	3.06752	-0.238024	11.5498	0.00245072	0.0148189
																												ENSBTAG00000002299	2.99566	1.30936	11.1487	0.00245251	0.014824
																												ENSBTAG00000030338	2.05818	-1.51878	12.1585	0.00246013	0.0148487
																												ENSBTAG00000007705	2.33522	6.35254	11.1367	0.00246381	0.0148582
																												ENSBTAG00000021557	-2.68284	-0.829818	11.1164	0.00248293	0.0149221
																												ENSBTAG00000039995	3.10693	6.42092	11.1098	0.00248917	0.0149483
																												ENSBTAG00000024726	-2.72839	4.69964	11.1017	0.00249684	0.0149716
																												ENSBTAG00000010952	2.36826	-0.715439	11.0341	0.00256214	0.0152358
																												ENSBTAG00000047174	2.89955	7.07967	11.013	0.00258289	0.0153188
																												ENSBTAG00000009513	-2.71226	4.94013	11.0061	0.0025897	0.0153533
																												ENSBTAG00000014705	2.92772	-0.171452	11.3778	0.00260652	0.0154278
																												ENSBTAG00000040208	-3.19156	-1.98529	11.1636	0.00260714	0.0154278
																												ENSBTAG00000002894	2.53194	0.237681	10.9802	0.00261545	0.0154654
																												ENSBTAG00000031377	2.89472	-1.64403	10.9788	0.0026169	0.0154681
																												ENSBTAG00000011779	3.09088	-1.23169	10.9319	0.00266435	0.0156957
																												ENSBTAG00000023028	2.1522	-0.502103	10.9269	0.00266945	0.0157083
																												ENSBTAG00000010245	2.78118	-1.4091	10.9177	0.00267886	0.0157401
																												ENSBTAG00000009064	2.45219	-0.836768	10.9074	0.00268949	0.0157735
																												ENSBTAG00000016486	2.07951	0.501158	10.8775	0.00272052	0.0158902
																												ENSBTAG00000045757	3.4535	8.18483	10.838	0.00276209	0.0160439
																												ENSBTAG00000046011	2.30881	0.445657	10.801	0.00280173	0.0162383
																												ENSBTAG00000021218	3.76452	10.0809	10.7971	0.00280596	0.0162553
																												ENSBTAG00000021066	2.23752	5.12912	10.7964	0.00280673	0.0162553
																												ENSBTAG00000007547	3.38807	5.04941	10.7923	0.00281111	0.016274
																												ENSBTAG00000023177	3.37683	2.61781	10.7889	0.00281477	0.016274
																												ENSBTAG00000014523	4.17107	-2.22231	11.1623	0.0028172	0.016274
																												ENSBTAG00000046118	2.1795	0.480269	10.7792	0.00282531	0.0162853
																												ENSBTAG00000013569	-3.32393	-1.17175	10.7696	0.00283582	0.016322
																												ENSBTAG00000011869	3.85029	4.18461	10.7652	0.00284061	0.0163336
																												ENSBTAG00000046766	-2.06096	1.49678	10.7641	0.00284183	0.0163336
																												ENSBTAG00000035975	2.34465	-1.70522	10.7467	0.00285745	0.0163986
																												ENSBTAG00000010384	-2.49802	3.03239	10.7389	0.00286954	0.0164552
																												ENSBTAG00000030296	3.20646	-1.80191	11.319	0.00291088	0.0166387
																												ENSBTAG00000030333	2.41331	5.41332	10.6887	0.00292568	0.0166871
																												ENSBTAG00000030084	2.27591	-0.351886	10.6746	0.00294171	0.0167156
																												ENSBTAG00000008140	2.02648	7.0753	10.6614	0.0029568	0.0167857
																												ENSBTAG00000040053	2.57705	2.89537	10.638	0.00298363	0.0168746
																												ENSBTAG00000002699	2.4759	0.94559	10.628	0.00299523	0.0169126
																												ENSBTAG00000002613	-2.04091	4.39308	10.5855	0.00304494	0.0171078
																												ENSBTAG00000015520	3.12963	-0.810907	10.5785	0.00305327	0.0171457
																												ENSBTAG00000021673	-2.53782	4.34161	10.5388	0.00310056	0.0172856
																												ENSBTAG00000011381	2.68078	-1.03581	10.5162	0.00312791	0.0174003
																												ENSBTAG00000003544	2.4183	-0.913308	10.4879	0.0031626	0.0175394
																												ENSBTAG00000020872	3.44386	-1.16879	10.482	0.00316981	0.0175715
																												ENSBTAG00000005321	2.10914	2.74884	10.4309	0.00323356	0.0178102
																												ENSBTAG00000020569	2.03026	4.27811	10.4116	0.00325793	0.0179214
																												ENSBTAG00000007324	3.9963	-2.15658	10.9864	0.00327159	0.0179653
																												ENSBTAG00000013802	2.89583	1.94273	10.3881	0.00328799	0.0180467
																												ENSBTAG00000040386	3.39996	-1.7182	10.3875	0.0032887	0.0180467
																												ENSBTAG00000014581	2.12907	5.08278	10.3761	0.00330342	0.0181023
																												ENSBTAG00000020294	2.43479	-1.13259	10.3634	0.00331981	0.018164
																												ENSBTAG00000003334	2.89217	-1.27125	10.361	0.0033229	0.0181712
																												ENSBTAG00000015366	2.29271	8.81657	10.3557	0.00332976	0.0181961
																												ENSBTAG00000014177	2.29306	2.77497	10.3026	0.00339965	0.0184691
																												ENSBTAG00000020704	-4.14875	-2.23387	10.2955	0.00340903	0.0184948
																												ENSBTAG00000001706	2.54431	-1.22191	10.282	0.00342713	0.0185547
																												ENSBTAG00000006081	-2.16719	-1.44627	10.2478	0.00346636	0.0187093
																												ENSBTAG00000014058	2.12764	3.16814	10.2395	0.00348466	0.0187696
																												ENSBTAG00000020087	2.55683	0.791666	10.223	0.00350732	0.0188659
																												ENSBTAG00000010517	2.26401	-0.313066	10.22	0.00351139	0.0188774
																												ENSBTAG00000013412	2.85985	4.78685	10.2025	0.0035356	0.0189792
																												ENSBTAG00000023648	4.46673	-2.06507	11.4094	0.003538	0.0189856
																												ENSBTAG00000019262	-2.75701	6.52892	10.191	0.00355169	0.0190268
																												ENSBTAG00000014199	-2.6504	-1.41321	10.186	0.0035586	0.0190508
																												ENSBTAG00000004224	2.337	-0.989098	10.167	0.0035853	0.0191719
																												ENSBTAG00000010991	4.56066	5.33088	10.1664	0.0035861	0.0191719
																												ENSBTAG00000006951	2.53092	3.41341	10.1643	0.00358908	0.0191719
																												ENSBTAG00000020269	2.22843	-1.74077	10.1507	0.00359995	0.0191892
																												ENSBTAG00000012449	2.15018	2.38876	10.1488	0.00361099	0.0192205
																												ENSBTAG00000021842	3.74032	-1.87006	10.3006	0.00361245	0.0192217
																												ENSBTAG00000027563	2.11989	-1.25829	10.1328	0.00363158	0.0192975
																												ENSBTAG00000006882	-2.40502	4.57565	10.1077	0.00367	0.0194343
																												ENSBTAG00000017883	4.88119	-1.30155	10.4308	0.00368424	0.0194855
																												ENSBTAG00000017273	2.79968	-0.72698	10.0829	0.00370591	0.0195673
																												ENSBTAG00000020247	3.57861	-1.43456	10.215	0.00373287	0.0196665
																												ENSBTAG00000037768	3.37383	1.11464	10.0575	0.00374327	0.0197074
																												ENSBTAG00000014088	2.26739	0.313986	10.028	0.00378709	0.0198829
																												ENSBTAG00000045954	2.23626	1.27849	10.021	0.00379755	0.0199014
																												ENSBTAG00000007338	4.24707	-1.83055	10.34	0.00381077	0.0199335
																												ENSBTAG00000021576	-2.20671	5.54267	9.97034	0.00387441	0.0201337
																												ENSBTAG00000035844	2.03135	-0.454002	9.96775	0.00387838	0.0201477
																												ENSBTAG00000010927	2.6263	4.33352	9.94326	0.00391616	0.0202705
																												ENSBTAG00000009294	2.02209	-0.946326	9.91375	0.00396222	0.0204419
																												ENSBTAG00000004458	2.02041	-1.63272	9.89581	0.00398285	0.0205081
																												ENSBTAG00000037605	4.58753	-2.35512	10.4191	0.00400645	0.0206095
																												ENSBTAG00000020928	2.43344	2.63421	9.84876	0.00406574	0.0208112
																												ENSBTAG00000002865	2.98508	-0.00742791	9.79987	0.00414554	0.0210437
																												ENSBTAG00000007901	4.06226	-2.09493	9.93292	0.00416217	0.0210942
																												ENSBTAG00000042684	-2.27763	-0.868508	9.75766	0.00421582	0.0212841
																												ENSBTAG00000021735	-2.1477	-0.190219	9.74732	0.00423324	0.0213447
																												ENSBTAG00000008463	2.4242	-0.673279	9.74072	0.00424439	0.0213804
																												ENSBTAG00000015086	2.44344	3.89262	9.73085	0.00426113	0.0214503
																												ENSBTAG00000033292	-3.40988	-0.0546801	9.72528	0.00427061	0.0214782
																												ENSBTAG00000037399	2.10299	4.74625	9.70176	0.00431089	0.0216051
																												ENSBTAG00000044025	3.57845	-1.85995	10.2133	0.00431676	0.0216054
																												ENSBTAG00000016857	2.52279	0.948736	9.69832	0.00431682	0.0216054
																												ENSBTAG00000038361	-3.94547	0.461637	9.82745	0.00433625	0.0216745
																												ENSBTAG00000009836	-3.37678	0.114391	9.66235	0.00437929	0.0218354
																												ENSBTAG00000044862	2.14772	-1.53995	9.65722	0.00438415	0.0218474
																												ENSBTAG00000009752	2.6374	1.66416	9.6549	0.00439237	0.0218814
																												ENSBTAG00000020394	2.61775	-0.672173	9.65225	0.00439702	0.0218839
																												ENSBTAG00000009396	-2.77862	2.52722	9.6236	0.00444773	0.0220667
																												ENSBTAG00000007860	-2.64774	5.93237	9.61767	0.00445829	0.0220868
																												ENSBTAG00000038600	-3.42132	-0.824034	9.61471	0.00446359	0.0221036
																												ENSBTAG00000017824	2.99945	-1.29987	9.60854	0.00447463	0.022142
																												ENSBTAG00000009812	-3.31186	4.6294	9.60646	0.00447836	0.022142
																												ENSBTAG00000002444	-3.1365	8.19152	9.57254	0.00453966	0.0223541
																												ENSBTAG00000019818	2.38387	4.36224	9.56178	0.00455929	0.0224367
																												ENSBTAG00000043553	3.24204	8.66109	9.55669	0.00456862	0.0224687
																												ENSBTAG00000004215	2.2021	3.79486	9.53056	0.00461679	0.0226491
																												ENSBTAG00000002266	3.31636	-2.01589	9.52537	0.00462643	0.0226753
																												ENSBTAG00000022244	2.40605	7.52411	9.48945	0.00469372	0.0229409
																												ENSBTAG00000021904	2.80327	0.720031	9.48741	0.00469757	0.0229455
																												ENSBTAG00000016221	2.15165	4.61045	9.46244	0.00474501	0.0231368
																												ENSBTAG00000012638	5.34694	0.120124	9.7511	0.00475767	0.0231775
																												ENSBTAG00000002035	2.67131	-1.18417	9.4555	0.00475828	0.0231775
																												ENSBTAG00000045895	3.85915	1.24939	9.45062	0.00476764	0.0232088
																												ENSBTAG00000047944	-4.57523	-2.39306	9.69691	0.004857	0.0235132
																												ENSBTAG00000042358	-2.18268	-1.11785	9.39966	0.00486554	0.0235329
																												ENSBTAG00000001078	2.12538	7.48414	9.39145	0.00488273	0.0235944
																												ENSBTAG00000017780	-3.10873	0.560174	9.34557	0.00497406	0.0238961
																												ENSBTAG00000038630	4.08413	-0.682605	9.34388	0.00497747	0.0238985
																												ENSBTAG00000011043	5.04004	-2.32341	9.62075	0.00500048	0.023958
																												ENSBTAG00000010948	2.33086	2.86096	9.32333	0.005019	0.0240134
																												ENSBTAG00000021639	2.49942	-0.785038	9.28963	0.00508794	0.0242147
																												ENSBTAG00000048122	2.32207	-1.69643	9.28295	0.0050999	0.0242357
																												ENSBTAG00000014885	2.58555	6.44798	9.26535	0.00513823	0.0243665
																												ENSBTAG00000017183	2.83306	8.31921	9.25428	0.00516135	0.0244247
																												ENSBTAG00000018088	2.13398	2.8158	9.2165	0.00524109	0.0246984
																												ENSBTAG00000004948	2.23582	-1.51819	9.33336	0.00526475	0.0247729
																												ENSBTAG00000001417	6.63644	-1.70389	9.31814	0.00529659	0.0248708
																												ENSBTAG00000012684	4.62372	-1.3882	9.30818	0.00531756	0.024947
																												ENSBTAG00000021483	3.32733	4.98085	9.16516	0.0053516	0.0250769
																												ENSBTAG00000006745	2.29822	-1.68717	9.15217	0.00537996	0.0251799
																												ENSBTAG00000004019	2.59601	3.78565	9.1305	0.00542764	0.0253579
																												ENSBTAG00000001343	-2.63425	3.10151	9.12894	0.00543108	0.0253587
																												ENSBTAG00000005596	-2.5217	5.63365	9.11024	0.00547262	0.0255152
																												ENSBTAG00000046604	2.71797	5.02048	9.10349	0.0054877	0.0255684
																												ENSBTAG00000046044	4.12708	-2.62063	10.0702	0.00550734	0.0256316
																												ENSBTAG00000021835	2.26797	2.16103	9.06171	0.00558204	0.0258877
																												ENSBTAG00000011803	3.35793	11.7072	9.04801	0.00561336	0.0259947
																												ENSBTAG00000017746	2.59207	3.74803	9.01453	0.0056907	0.0262144
																												ENSBTAG00000038048	2.08524	3.2274	9.00868	0.00570435	0.0262337
																												ENSBTAG00000040323	3.27854	1.37926	8.99637	0.00573313	0.0263101
																												ENSBTAG00000008792	3.67385	-2.57948	9.4326	0.00575967	0.0263937
																												ENSBTAG00000023784	2.23519	2.15269	8.97143	0.00579199	0.026493
																												ENSBTAG00000021057	-2.96125	-1.35201	8.96927	0.00579711	0.026493
																												ENSBTAG00000020837	-2.03196	0.25413	8.96886	0.00579809	0.026493
																												ENSBTAG00000002661	2.4075	0.65953	8.95659	0.00582731	0.02656
																												ENSBTAG00000020142	2.43942	2.84296	8.95157	0.0058393	0.0265732
																												ENSBTAG00000012815	4.1905	-2.72566	9.35582	0.00592822	0.0268095
																												ENSBTAG00000009014	2.35336	-1.60938	8.91276	0.00593051	0.0268105
																												ENSBTAG00000023039	2.36981	4.55532	8.90342	0.00595581	0.0269017
																												ENSBTAG00000039356	4.4279	-0.240503	9.33669	0.00597107	0.0269475
																												ENSBTAG00000019686	2.38616	-1.11496	8.89119	0.00598579	0.0269957
																												ENSBTAG00000021717	2.16466	-0.810505	8.8884	0.00599267	0.0270141
																												ENSBTAG00000000053	2.56537	4.81055	8.88282	0.00600643	0.027032
																												ENSBTAG00000007445	2.70723	-0.984294	8.87835	0.00601746	0.027064
																												ENSBTAG00000017138	-3.76909	-1.54544	8.85997	0.00606309	0.0272072
																												ENSBTAG00000007153	4.02443	-1.26325	9.28962	0.00607795	0.0272597
																												ENSBTAG00000046755	2.27892	-0.225956	8.85391	0.00607825	0.0272597
																												ENSBTAG00000020042	2.09333	3.42694	8.80459	0.00620293	0.0277008
																												ENSBTAG00000002898	2.64839	5.84168	8.78635	0.00624974	0.0278547
																												ENSBTAG00000011558	3.18588	-1.98716	8.8697	0.00633647	0.0281221
																												ENSBTAG00000013488	3.14962	-1.98628	8.72863	0.00640043	0.0283025
																												ENSBTAG00000046030	2.47133	-1.13406	8.72489	0.00641032	0.0283304
																												ENSBTAG00000014596	2.41135	2.80215	8.71249	0.00644326	0.0284441
																												ENSBTAG00000005477	2.5666	2.36217	8.69601	0.00648732	0.0285872
																												ENSBTAG00000010048	-2.14747	2.18382	8.69578	0.00648795	0.0285872
																												ENSBTAG00000021193	-2.13277	3.12664	8.6947	0.00649085	0.0285902
																												ENSBTAG00000047807	-2.21733	1.41101	8.65547	0.00659713	0.0289503
																												ENSBTAG00000018077	2.36419	0.210593	8.6346	0.00665445	0.0290898
																												ENSBTAG00000008368	2.14852	-1.57458	8.6179	0.00670069	0.0292289
																												ENSBTAG00000005925	3.95065	-2.5417	9.23495	0.00670798	0.0292446
																												ENSBTAG00000021132	2.38484	6.25307	8.60469	0.00673754	0.0293491
																												ENSBTAG00000003774	2.58725	-1.8868	8.55939	0.00686268	0.0297219
																												ENSBTAG00000021994	2.33579	-1.4154	8.559	0.00686664	0.0297293
																												ENSBTAG00000044091	2.58969	-1.99614	8.5565	0.00687025	0.0297293
																												ENSBTAG00000011759	-2.10091	-0.595562	8.53402	0.00693837	0.0299839
																												ENSBTAG00000012088	2.02766	7.24712	8.50876	0.00701174	0.030187
																												ENSBTAG00000002680	-2.07383	0.716024	8.50121	0.00703381	0.0302555
																												ENSBTAG00000046309	2.1441	2.61655	8.49729	0.00704531	0.0302802
																												ENSBTAG00000005353	2.16692	10.7791	8.47863	0.00710033	0.0304091
																												ENSBTAG00000038606	3.25014	-2.4621	8.71281	0.00712227	0.0304782
																												ENSBTAG00000012234	-2.64663	-0.354138	8.4649	0.00714112	0.0305423
																												ENSBTAG00000009353	2.7406	-1.32727	8.46396	0.00714391	0.030546
																												ENSBTAG00000017864	-4.24975	-2.10472	8.44247	0.0072083	0.0307132
																												ENSBTAG00000047538	2.64387	0.287483	8.41636	0.00728735	0.0309247
																												ENSBTAG00000018778	2.27428	-1.85206	8.40681	0.00731652	0.0309985
																												ENSBTAG00000047009	-2.87026	-1.46722	8.40108	0.00733406	0.0310478
																												ENSBTAG00000034954	6.85617	-2.46277	10.0226	0.0073436	0.0310715
																												ENSBTAG00000004337	-2.06734	-0.169912	8.3927	0.00735982	0.0311232
																												ENSBTAG00000008575	2.19088	2.13031	8.37503	0.00741444	0.0312372
																												ENSBTAG00000015235	2.08462	5.49966	8.3684	0.00743506	0.031274
																												ENSBTAG00000003777	-3.42593	-1.39812	8.36448	0.00744727	0.031317
																												ENSBTAG00000011266	2.71061	1.90569	8.34901	0.00749567	0.0314619
																												ENSBTAG00000017348	-2.65835	1.25018	8.32544	0.00757013	0.0316817
																												ENSBTAG00000019159	2.57968	-0.111936	8.31765	0.00759489	0.0317597
																												ENSBTAG00000047650	2.23542	-0.730985	8.31269	0.00761072	0.0317926
																												ENSBTAG00000024449	-2.61355	6.05499	8.31053	0.00761761	0.0318045
																												ENSBTAG00000011234	2.24138	4.22927	8.30698	0.00762897	0.0318351
																												ENSBTAG00000001325	3.16591	-2.51694	8.2812	0.007712	0.0320798
																												ENSBTAG00000005261	3.57896	0.132176	8.2626	0.00777254	0.0322904
																												ENSBTAG00000038337	2.57168	-2.0468	8.24209	0.00783987	0.0324918
																												ENSBTAG00000009643	2.07883	1.7866	8.21917	0.00791585	0.032678
																												ENSBTAG00000026825	2.71728	-1.8659	8.2142	0.00793246	0.0327209
																												ENSBTAG00000019545	2.02884	1.79045	8.20272	0.00797089	0.0328135
																												ENSBTAG00000007550	3.14417	-0.519149	8.14043	0.00818313	0.0334576
																												ENSBTAG00000000477	3.84865	0.371591	8.13938	0.00818676	0.0334629
																												ENSBTAG00000003341	2.2769	-1.5786	8.12701	0.00822963	0.0335868
																												ENSBTAG00000048005	-5.89773	-2.68092	8.86148	0.00839863	0.0340214
																												ENSBTAG00000012223	2.95294	-0.368367	8.06714	0.00844076	0.0341569
																												ENSBTAG00000048230	-2.68249	-0.279972	8.03345	0.00856214	0.0345242
																												ENSBTAG00000007823	2.57089	2.41415	8.02444	0.00859492	0.0346054
																												ENSBTAG00000020755	-5.58897	-0.995741	8.23724	0.00861599	0.0346616
																												ENSBTAG00000007772	-2.56616	-0.738528	8.00985	0.00864828	0.0347492
																												ENSBTAG00000027684	2.89843	-1.24072	7.97151	0.00879027	0.0352014
																												ENSBTAG00000015238	3.08679	-0.652459	7.9621	0.00882552	0.035302
																												ENSBTAG00000009705	2.35309	9.12295	7.96041	0.00883187	0.0353141
																												ENSBTAG00000009968	2.06154	-0.121987	8.16649	0.00886631	0.0354159
																												ENSBTAG00000047514	2.12636	-0.798675	7.95023	0.0088702	0.0354224
																												ENSBTAG00000045498	-2.1902	-1.71958	7.93769	0.00891293	0.0355481
																												ENSBTAG00000047594	-2.22157	-0.660764	7.92925	0.00894975	0.0356319
																												ENSBTAG00000020699	2.03599	3.77452	7.89442	0.00908355	0.0360102
																												ENSBTAG00000000261	2.39556	-1.84171	7.84647	0.00927133	0.0365928
																												ENSBTAG00000008111	-2.35729	-0.209634	7.84316	0.00928444	0.0366162
																												ENSBTAG00000030523	2.19921	-1.59862	7.81657	0.00938647	0.0368887
																												ENSBTAG00000044010	3.5617	-1.30243	7.79786	0.00946604	0.0370923
																												ENSBTAG00000017376	2.26885	0.106927	7.7826	0.00952805	0.0372484
																												ENSBTAG00000015510	2.02312	0.863628	7.77216	0.00957077	0.0373691
																												ENSBTAG00000020839	-2.22621	5.69695	7.73052	0.00974316	0.0378735
																												ENSBTAG00000027383	6.79278	-2.25687	9.11383	0.0097581	0.0378898
																												ENSBTAG00000047379	2.62472	4.7538	7.71729	0.00979862	0.0380049
																												ENSBTAG00000020568	-3.3094	-1.57728	7.70896	0.00983372	0.038086
																												ENSBTAG00000019348	2.59534	-1.96905	7.70576	0.00984727	0.0381041
																												ENSBTAG00000026275	6.95584	-2.64083	9.06472	0.00991297	0.038251
																												ENSBTAG00000008732	2.0455	2.898	7.68165	0.00994981	0.0383394
																												ENSBTAG00000001975	2.61228	-1.80086	7.58893	0.0103552	0.0395128
																												ENSBTAG00000017343	3.90725	-2.34973	7.56634	0.0104567	0.0397822
																												ENSBTAG00000023617	3.01449	-2.27205	7.75031	0.0105114	0.0399219
																												ENSBTAG00000046177	2.02527	4.14194	7.54753	0.010542	0.0399936
																												ENSBTAG00000021092	2.08844	-1.27916	7.53919	0.01058	0.0400682
																												ENSBTAG00000039932	3.65474	-2.50082	7.53502	0.0105991	0.0400682
																												ENSBTAG00000023600	2.88054	6.22363	7.52782	0.0106322	0.0401613
																												ENSBTAG00000016575	2.88406	-1.57393	7.71642	0.0106595	0.0402341
																												ENSBTAG00000045943	2.3181	8.32658	7.51783	0.0106782	0.040274
																												ENSBTAG00000011356	2.56344	-1.67289	7.51172	0.0107065	0.0403268
																												ENSBTAG00000011196	3.3451	-1.99949	7.82975	0.0107249	0.0403558
																												ENSBTAG00000010738	2.83772	-2.35417	7.68847	0.0107834	0.0405007
																												ENSBTAG00000018539	3.24153	-1.90076	7.56729	0.0108568	0.0407131
																												ENSBTAG00000047155	2.53838	3.18955	7.47854	0.0108615	0.0407131
																												ENSBTAG00000022039	2.92545	0.773293	7.45929	0.0109525	0.0409505
																												ENSBTAG00000005243	2.34877	0.810772	7.44982	0.0109975	0.0410494
																												ENSBTAG00000046666	2.0139	-0.965604	7.39435	0.0112658	0.0417561
																												ENSBTAG00000007440	2.04244	-1.55025	7.37	0.0113808	0.0420736
																												ENSBTAG00000019636	3.59838	4.26294	7.36135	0.0114287	0.0421794
																												ENSBTAG00000000644	-2.10207	-0.750271	7.32311	0.0116207	0.0426705
																												ENSBTAG00000033008	2.26917	8.31405	7.31201	0.0116771	0.042788
																												ENSBTAG00000014335	3.66525	0.548421	7.27631	0.0118605	0.0432693
																												ENSBTAG00000005759	4.42937	-1.04032	7.45316	0.0118918	0.0433315
																												ENSBTAG00000001920	-2.21711	2.83423	7.26985	0.0118941	0.0433315
																												ENSBTAG00000047526	2.02311	-1.87025	7.21683	0.0121683	0.0439955
																												ENSBTAG00000003829	2.83542	-1.86626	7.20529	0.0122349	0.0441755
																												ENSBTAG00000001051	2.44565	-0.520087	7.18443	0.0123473	0.0444541
																												ENSBTAG00000003574	2.17891	2.1089	7.16993	0.012426	0.0446512
																												ENSBTAG00000047894	-4.21331	0.0918519	7.16478	0.0124542	0.0446972
																												ENSBTAG00000011036	2.69994	3.79169	7.16329	0.0124623	0.0447002
																												ENSBTAG00000001049	2.16592	1.3371	7.15888	0.0124865	0.0447258
																												ENSBTAG00000012838	-2.89991	-0.838039	7.14396	0.0125685	0.0449308
																												ENSBTAG00000003923	-2.0224	-1.58571	7.13107	0.012635	0.0451062
																												ENSBTAG00000017411	2.04006	1.65361	7.10849	0.0127661	0.0454693
																												ENSBTAG00000047231	2.50739	6.50686	7.09969	0.0128156	0.0455942
																												ENSBTAG00000006035	2.0434	2.91609	7.08163	0.0129179	0.045824
																												ENSBTAG00000007687	2.59057	0.553466	7.07981	0.0129283	0.0458298
																												ENSBTAG00000030016	2.09874	-1.75404	7.07887	0.0129336	0.0458298
																												ENSBTAG00000020979	2.97935	3.57087	7.06736	0.0129994	0.0459756
																												ENSBTAG00000039892	2.61134	-1.40973	7.05627	0.0130631	0.0461212
																												ENSBTAG00000006720	3.42803	-0.488137	7.05507	0.01307	0.0461353
																												ENSBTAG00000008428	-2.16364	1.12251	7.05149	0.0130906	0.0461977
																												ENSBTAG00000021681	-2.34104	2.59815	7.02588	0.0132394	0.0465948
																												ENSBTAG00000010562	2.06552	2.71906	7.02509	0.013244	0.0465948
																												ENSBTAG00000006453	2.78713	0.505446	7.09386	0.0132991	0.0467244
																												ENSBTAG00000030024	2.46349	-2.05279	6.99312	0.0134307	0.0470507
																												ENSBTAG00000048075	2.05585	3.15021	6.95878	0.013638	0.0476077
																												ENSBTAG00000004958	-2.72362	0.227586	6.94666	0.0137114	0.04779
																												ENSBTAG00000004150	-2.39195	-0.535392	6.94408	0.013727	0.047834
																												ENSBTAG00000021425	-2.14224	-0.879234	6.921	0.0138681	0.0481555
																												ENSBTAG00000045702	2.53583	4.4597	6.90681	0.0139557	0.0483427
																												ENSBTAG00000001021	-2.99901	0.0236761	6.90122	0.0139904	0.0484096
																												ENSBTAG00000014921	-2.94597	1.00901	6.89388	0.014036	0.0485143
																												ENSBTAG00000012393	7.31155	-1.8817	7.97815	0.0141981	0.0488497
																												ENSBTAG00000010531	2.47636	2.84981	6.85475	0.0142822	0.0490216
																												ENSBTAG00000032631	5.0688	-2.44187	7.93179	0.0144244	0.049403
																												ENSBTAG00000001851	3.4021	0.943086	6.90115	0.0144612	0.04948
																												ENSBTAG00000033545	2.94504	-1.3534	6.98236	0.0145075	0.0495901
